# Supplementary material
Source: PubMed Central journal article supplement (PMC2796191)
Supplement: NIHMS152020-supplement-1_si_001.pdf [file NIHMS152020-supplement-1_si_001.pdf]

# Enantioselective Rhodium-Catalyzed [2+2+2] Cycloadditions of Terminal Alkynes and Alkenyl Isocyanates: Mechanistic Insights Lead to a Unified Model that Rationalizes Product Selectivity

*Derek M. Dalton, Kevin M. Oberg, Robert T. Yu, Ernest E. Lee, Stéphane Perreault, Mark Emil Oinen, Melissa L. Pease, Guillaume Malik, and Tomislav Rovis\**

Department of Chemistry, Colorado State University, Fort Collins, CO 80523

\*[rovis@lamar.colostate.edu](mailto:rovis@lamar.colostate.edu)

## Supporting Information

|                                                                              |       |
|------------------------------------------------------------------------------|-------|
| 1. General Methods.....                                                      | S-2   |
| 2. General Procedure for Synthesis of Ligands.....                           | S-2   |
| 3. Synthesis of Isocyanate Precursors.....                                   | S-4   |
| 4. General Procedure for Synthesis of Isocyanates.....                       | S-5   |
| 5. General Procedure for Rhodium-Catalyzed [2+2+2] Cycloadditions.....       | S-6   |
| 6. Dimerization of Terminal Alkynes.....                                     | S-11  |
| 7. Competition Experiments of Alkenyl Isocyanates.....                       | S-12  |
| 8. Synthesis of Rhodium Ligand Complexes.....                                | S-13  |
| 9. Linear Free Energy Relationship.....                                      | S-14  |
| 10. <sup>1</sup> H NMR and <sup>13</sup> C NMR Spectra of New Compounds..... | S-15  |
| 11. Crystallographic Data.....                                               | S-49  |
| 12. References.....                                                          | S-113 |

## General Methods:

All reactions were carried out under an atmosphere of argon in oven-dried glassware with magnetic stirring. Toluene was degassed with argon and passed through one column of neutral alumina and one column of Q5 reactant. Tetrahydrofuran was degassed with argon and passed through two columns of neutral alumina. Column chromatography was performed on Silicycle Inc. silica gel 60 (230-400 mesh). Thin layer chromatography was performed on Silicycle Inc. 0.25 mm silica gel 60-F plates. Visualization was accomplished with UV light (254 nm), potassium permanganate, and/or ceric ammonium molybdate.

$^1\text{H}$  NMR and  $^{13}\text{C}$  NMR spectra were obtained in  $\text{CDCl}_3$  at ambient temperature and chemical shifts are expressed in parts per million ( $\delta$ , ppm). Proton chemical shifts are referenced to 7.26 ppm ( $\text{CHCl}_3$ ) and carbon chemical shifts are referenced to 77.0 ppm ( $\text{CDCl}_3$ ). Data reporting uses the following abbreviations: s, singlet; bs, broad singlet; d, doublet; t, triplet; m, multiplet; and  $J$ , coupling constant in Hz.

Ligands **B1** and **B3** were purchased from Aldrich Chemicals Co. and used without further purification. Ligands **T1-T3**,<sup>1</sup> **T8** and **T9**,<sup>2</sup> and **B4**<sup>3</sup> were synthesized as previously reported. **A1**<sup>4</sup> and **T5**<sup>5</sup> were prepared according to literature procedures. Alkynes were purchased from Aldrich Chemicals Co. and used without further purification or synthesized as previously reported.<sup>1</sup>  $[\text{Rh}(\text{C}_2\text{H}_4)_2\text{Cl}]_2$  was purchased from Strem Chemicals, Inc. and used without further purification. Isocyanates **2a-2e** and **2h-2k** were prepared as previously reported.<sup>2</sup> The synthesis of isocyanates **2f**, **2g**, and **2l-2q** are described herein.

## General Procedure for Synthesis of Ligands:

The diol (0.27 mmol) was dissolved in THF in an oven-dried round bottom flask with a magnetic stir bar.  $\text{Et}_3\text{N}$  (3.5 eq, 0.95 mmol) was added and the reaction mixture was cooled to 0 °C before dropwise addition of phosphorous trichloride (1.1 eq, 0.30 mmol). The reaction mixture was stirred for 1 h and the amine (10 eq, 2.70 mmol) was added slowly at 0 °C. The reaction was stirred overnight at 23 °C, diluted with ether, and filtered. The filtrate was concentrated in *vacuo* and the resulting crude material was purified by flash column chromatography (98:2 Hex:EtOAc) to afford the desired phosphoramidite.

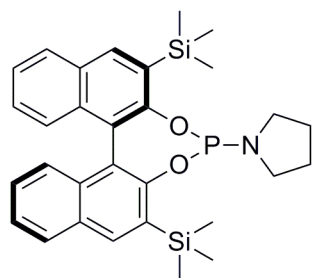

$[\text{C}_{30}\text{H}_{37}\text{NO}_2\text{PSi}_2]^+$  calcd 530.2095, found 530.2104.

### ***O,O*-(*R*)-3,3'-bis(trimethylsilyl)-1,1'-binaphthyl-2,2'-diyl-**

**pyrrolidinephosphoramidite (B5).** General procedure yielded a white solid (85%).  $[\alpha]_{\text{D}}^{20} = -550.4^\circ$ ,  $c = 0.01$  g/ml  $\text{CHCl}_3$ .  $^1\text{H}$  NMR (400 MHz,  $\text{CDCl}_3$ )  $\delta$  8.07 (m, 2H), 7.90 (m, 2H), 7.32 (m, 2H), 7.18 (m, 4H), 3.18 (m, 2H), 2.84 (bs, 2H), 1.65 (m, 4H), 0.45 (s, 9H), 0.44 (s, 9H).  $^{13}\text{C}$  NMR (75 MHz,  $\text{CDCl}_3$ )  $\delta$  137.8, 136.6, 134.0, 133.7, 132.5, 132.2, 130.7, 130.1, 128.5, 128.3, 128.1, 127.5, 126.8, 126.7, 126.1, 124.2, 123.9, 123.6, 45.9, 45.7, 25.9, 25.8, 0.1, 0.0, -0.1, -0.9.  $^{31}\text{P}$  NMR (75 MHz,  $\text{CDCl}_3$ )  $\delta$  149.82.  $R_f = 0.62$  (98:2 Hex:EtOAc). IR (NaCl, Thin Film) 3534, 3053, 3032, 2960, 2899, 2858, 1578, 1388, 1255, 1086, 968, 835, 753  $\text{cm}^{-1}$ . HRMS (ESI)  $m/z$

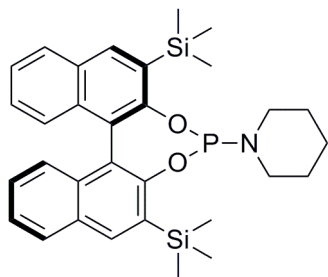

$[\text{C}_{31}\text{H}_{39}\text{NO}_2\text{PSi}_2]^+$  calcd 544.2251, found 544.2263.

### ***O,O*-(*R*)-3,3'-bis(trimethylsilyl)-1,1'-binaphthyl-2,2'-diyl-**

**piperidinephosphoramidite (B6).** General procedure yielded a white solid (89%).  $[\alpha]_{\text{D}} = -505.4^\circ$ ,  $c = 0.01$  g/ml  $\text{CHCl}_3$ .  $^1\text{H}$  NMR (400 MHz,  $\text{CDCl}_3$ )  $\delta$  8.07 (m, 2H), 7.91 (m, 2H), 7.39 (m, 3H), 7.17 (m, 3H), 2.92 (m, 2H), 1.53 (m, 4H), 1.32 (m, 2H), 0.51 (s, 9H), 0.45 (s, 9H).  $^{13}\text{C}$  NMR (75 MHz,  $\text{CDCl}_3$ )  $\delta$  153.6, 136.7, 133.9, 133.7, 132.6, 132.1, 130.7, 130.0, 128.3, 128.2, 126.8, 126.7, 126.1, 126.0, 124.3, 124.1, 30.3, 27.2, 24.8.  $^{31}\text{P}$  NMR (75 MHz,  $\text{CDCl}_3$ )  $\delta$  146.25.  $R_f = 0.40$  (98:2 Hex:EtOAc). IR (NaCl, Thin Film) 3052, 2935, 2853, 1368, 1240, 1091, 1055,



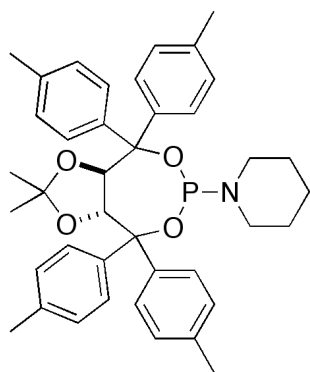

**1-((3aR,8aR)-2,2-dimethyl-4,4,8,8-tetraphenyltetrahydro-[1,3]dioxolo[4,5-e][1,3,2]dioxaphosphepin-6-yl)piperidine (T6).** General procedure yielded a white solid (69%).  $[\alpha]_D^{20} = -95.9^\circ$ ,  $c = 0.01\text{g/ml}$ ,  $\text{CH}_2\text{Cl}_2$ .  $^1\text{H NMR}$  (300 MHz,  $\text{CDCl}_3$ )  $\delta$  7.596 (d,  $J = 8.25$  Hz, 2H), 7.425 (d,  $J = 8.14$  Hz, 2H), 7.254 (dd,  $J = 18.02, 8.16$ , 4H), 7.028 (dd,  $J = 7.98, 4.14$  Hz, 6H), 6.979 (d,  $J = 8.19$  Hz, 2H), 5.039 (dd,  $J = 8.56$  Hz, 1H), 4.645 (d,  $J = 8.55$  Hz, 1H), 3.210 (m, 2H), 3.086 (m, 2H), 2.236 (d,  $J = 2.34$  Hz, 9H), 2.202 (s, 3H), 1.509 (m, 6H), 1.269 (s, 3H), 0.211 (s, 3H).  $^{13}\text{C NMR}$  (100 MHz,  $\text{CDCl}_3$ )  $\delta$  144.8, 144.3, 139.6, 139.5, 136.9, 136.8, 136.7, 136.6, 129.1, 128.9, 128.8, 128.5, 128.4, 128.0, 127.2, 111.4, 83.1, 82.9, 82.7, 81.4, 81.1, 45.3, 45.1, 27.9, 27.3, 25.6, 25.5, 21.4, 21.3, 21.2.  $^{31}\text{P NMR}$  (75 MHz,  $\text{CDCl}_3$ )  $\delta$  138.7.

$R_f = 0.34$  (19:1 Hex:EtOAc). IR (NaCl, Thin Film) 3027, 2986, 2940, 2853, 2361, 1506, 1445, 1378, 1255, 1209, 1168, 1050, 1030, 958, 830, 738  $\text{cm}^{-1}$ . HRMS (ESI)  $m/z$  calcd ( $\text{C}_{40}\text{H}_{46}\text{NO}_4\text{P}$ ) $^+$  635.3164, found 635.3174.

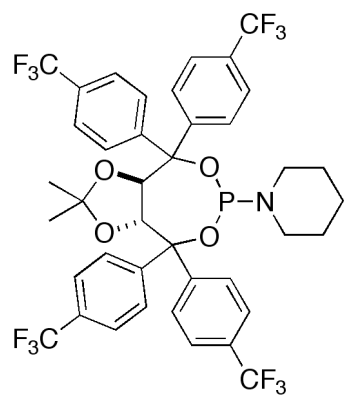

**1-((3aR,8aR)-2,2-dimethyl-4,4,8,8-tetrakis(trifluoromethyl)phenyltetrahydro-[1,3]dioxolo[4,5-e][1,3,2]dioxaphosphepin-6-yl)piperidine (T7).** General procedure yielded a white solid (51%).

$[\alpha]_D^{20} = -84.5^\circ$ ,  $c = 0.01\text{g/ml}$   $\text{CH}_2\text{Cl}_2$ .  $^1\text{H NMR}$  (300 MHz,  $\text{CDCl}_3$ )  $\delta$  7.88 (d,  $J = 8.3$  Hz, 2H), 7.72 (d,  $J = 8.3$  Hz, 2H), 7.66-7.49 (m, 13H), 5.08 (dd,  $J = 8.6, 3.5$  Hz, 1H), 4.58 (d,  $J = 8.6$  Hz, 1H), 3.25 (d,  $J = 26.5, 6.6$  Hz, 4H), 1.71-1.57 (m, 6H), 1.37 (s, 3H), 0.31 (s, 3H).  $^{13}\text{C NMR}$  (75 MHz,  $\text{CDCl}_3$ )  $\delta$  150.1, 149.3, 129.4, 129.1, 129.0, 127.6, 127.4, 126.0, 125.7, 125.6, 125.2, 124.5, 112.3, 82.5, 82.3, 82.0, 80.9, 45.4, 45.1, 27.7, 27.3, 27.2, 25.5, 25.2.  $^{31}\text{P NMR}$  (75 MHz,  $\text{CDCl}_3$ )  $\delta$  138.6.  $R_f = 0.44$  (19:1 Hex:EtOAc). IR (NaCl, Thin Film) 3581, 2991, 2935, 2848, 2366, 2330, 1782, 1716, 1619, 1450, 1409, 1368, 1322, 1158,

1117, 845, 728  $\text{cm}^{-1}$ . HRMS (ESI)  $m/z$  calcd [ $\text{C}_{40}\text{H}_{34}\text{F}_{12}\text{NO}_4\text{P}$ ] $^+$  851.2034, found 851.2032.

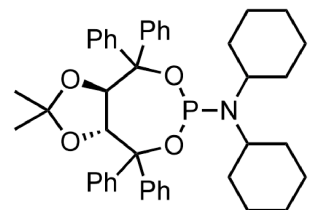

**(3aR,8aR)-N,N-dicyclohexyl-2,2-dimethyl-4,4,8,8-tetraphenyltetrahydro-[1,3]dioxolo[4,5-e][1,3,2]dioxaphosphepin-6-amine (T4).** General procedure yielded a white solid.

$[\alpha]_D^{20} = -60.6^\circ$ ,  $c = 0.01\text{g/ml}$ ,  $\text{CH}_2\text{Cl}_2$ .  $^1\text{H NMR}$  (400 MHz,  $\text{CDCl}_3$ )  $\delta$  7.80 (d,  $J = 7.4$  Hz, 2H), 7.60 (d,  $J = 7.6$  Hz, 2H), 7.42 (dd,  $J = 7.7, 2.3$  Hz, 4H), 7.29-7.14 (m, 12H), 5.13 (dd,  $J = 8.6, 3.3$  Hz, 1H), 4.60 (d,  $J = 8.6$  Hz, 1H), 3.45 (s, 2H), 1.86-1.74 (m, 8H), 1.59-1.28 (m, 15H), 1.02 (d,  $J = 13.1$  Hz, 2H) 0.20 (s, 3H).  $^{13}\text{C NMR}$  (100 MHz,  $\text{CDCl}_3$ )  $\delta$  147.7, 147.1, 143.0, 142.4, 129.2, 128.9, 128.8, 127.9, 127.7, 127.6, 127.5, 127.4, 127.1, 12

6.9, 111.2, 83.3, 83.0, 82.8, 54.0, 53.9, 35.5, 35.4, 35.2, 35.1, 27.9, 27.1, 27.0, 25.7, 25.2.  $^{31}\text{P NMR}$  (75 MHz,  $\text{CDCl}_3$ )  $\delta$  141.2.  $R_f = 0.30$  (19:1 Hex:EtOAc). IR (NaCl, Thin Film) 2991, 2919, 2843, 2356, 2331, 2249, 1783, 1711, 1440, 1327, 1168, 1025, 907. HRMS (ESI)  $m/e$  calcd ( $\text{C}_{43}\text{H}_{50}\text{NO}_4\text{P}+\text{H}^+$ ) 675.3477, found 675.3472.

## Synthesis of Isocyanate Precursors:

Acids **SM1** and **SM2** were synthesized as previously reported.<sup>2</sup>

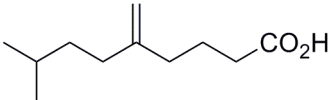 **8-Methyl-5-methylene-nonanoic acid (SM1).** General procedure yielded a clear liquid (56%). <sup>1</sup>H NMR (400 MHz, CDCl<sub>3</sub>) δ 4.75 (s, 1H), 4.72 (s, 1H), 2.37 (t, *J* = 7.0 Hz, 2H), 2.04 (t, *J* = 7.0 Hz, 2H), 1.97 (t, *J* = 7.0 Hz, 2H), 1.75 (tt, *J* = 7.0, 7.0 Hz, 2H), 1.50 (sext, *J* = 7.0 Hz, 1H), 1.27 (td, *J* = 7.0, 7.0 Hz, 2H), 0.86 (d, *J* = 7.0 Hz, 6H). <sup>13</sup>C NMR (100 MHz, CDCl<sub>3</sub>) δ 180.7, 149.1, 109.6, 37.2, 35.4, 33.8, 33.7, 28.0, 22.8. *R*<sub>f</sub> = 0.20 (Hex:EtOAc 3:1). IR (NaCl, Thin Film) 2962, 1709, 1413, 1248 cm<sup>-1</sup>.

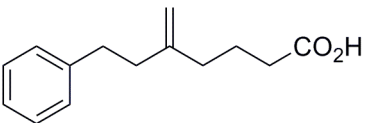 **5-Methylene-7-phenyl-heptanoic acid (SM2).** General procedure yielded a clear liquid (60%). <sup>1</sup>H NMR (400 MHz, CDCl<sub>3</sub>) δ 7.30-7.25 (m, 2H), 7.20-7.16 (m, 3H), 4.81 (s, 1H), 4.79 (s, 1H), 2.75 (t, *J* = 8.0 Hz, 2H), 2.36 (t, *J* = 7.5 Hz, 2H), 2.32 (t, *J* = 8.0 Hz, 2H), 2.11 (t, *J* = 7.5 Hz, 2H), 1.80 (tt, *J* = 8.0, 8.0 Hz, 2H). <sup>13</sup>C NMR (100 MHz, CDCl<sub>3</sub>) δ 180.5, 148.1, 142.3, 128.5, 126.1, 110.4, 37.8, 35.6, 34.5, 33.7, 22.7. *R*<sub>f</sub> = 0.20 (Hex:EtOAc 3:1). IR (NaCl, Thin Film) 3027, 2937, 1708, 1454, 1291, 1243, 893 cm<sup>-1</sup>.

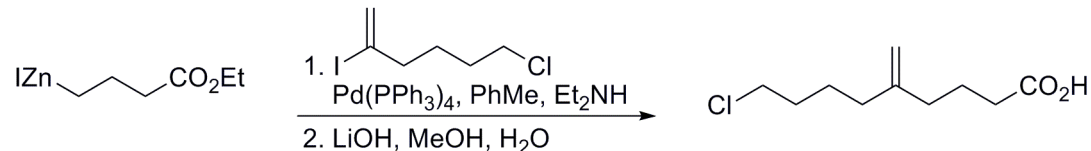

In a flame dried flask containing a suspension of zinc powder (204 mg, 3.12 mmol) in THF (0.5 mL) under Ar atmosphere, dibromoethane (23 mg, 0.12 mmol) was added. The solution was heated to 65 °C for 1 minute and cooled to room temperature. TMSCl (10 mg, 0.1 mmol) was then added, and the reaction stirred for 15 minutes. A solution of iodobutyrate (726 mg, 3.00 mmol) in THF (1.0 mL) was then added. The reaction was then stirred at 45 °C for 16 hours, cooled, and diluted with toluene/Et<sub>2</sub>NH (10 mL/1 mL). The solution was then transferred by cannula into a flask containing palladium (116 mg, 0.1 mmol) and vinyl iodide (500 mg, 2.04 mmol). The reaction was stirred at 65 °C for 2 hours. The reaction was cooled to 23 °C, concentrated, loaded onto silica gel, and purified by flash chromatography (99:1 Hex:EtOAc). The resulting ester (0.2 M) was added to a stirring suspension of LiOH (5 eq) in MeOH:H<sub>2</sub>O (3:1) and stirred at room temperature for 16 hours. The reaction was quenched with 1M HCl, extracted (Et<sub>2</sub>O x 3), dried over MgSO<sub>4</sub>, filtered, and concentrated in *vacuo*. The acid was then purified by silica gel flash chromatography (4:1 Hex:EtOAc).

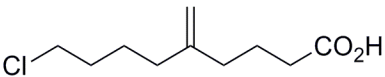 **9-Chloro-5-methylene-nonanoic acid (SM3).** Preceding procedure yielded a clear liquid (85%). <sup>1</sup>H NMR (400 MHz, CDCl<sub>3</sub>) δ 4.74 (s, 1H), 4.74 (s, 1H), 3.52 (t, *J* = 6.5 Hz, 2H), 2.34 (t, *J* = 7.0 Hz, 2H), 2.04 (t, *J* = 7.5 Hz, 2H), 2.01 (t, *J* = 7.5 Hz, 2H), 1.80-1.71 (m, 4H), 1.56 (tt, *J* = 7.5, 7.5 Hz, 2H). <sup>13</sup>C NMR (100 MHz, CDCl<sub>3</sub>) δ 179.6, 147.9, 110.4, 45.1, 35.2, 35.2, 33.5, 32.3, 25.0, 22.7. *R*<sub>f</sub> = 0.25 (3:1 Hex:EtOAc). IR (NaCl, Thin Film) 2940, 1709, 1413, 1273 cm<sup>-1</sup>.

## General Procedure for Synthesis of Isocyanates:

Isocyanates were synthesized as previously reported.<sup>2</sup>

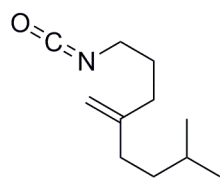

**1-Isocyanato-7-methyl-4-methylene-octane (2h).** General procedure yielded a clear liquid (79%). <sup>1</sup>H NMR (300 MHz, CDCl<sub>3</sub>) δ 4.81 (s, 1H), 4.77 (s, 1H), 3.56 (t, *J* = 6.5 Hz, 2H), 2.16 (t, *J* = 7.5 Hz, 2H), 2.06 (t, *J* = 7.0 Hz, 2H), 1.79 (dt, *J* = 6.5, 6.5 Hz, 2H), 1.59 (sept, *J* = 6.5 Hz, 1H), 1.41-1.32 (m, 2H), 0.95 (d, *J* = 6.5 Hz, 6H). <sup>13</sup>C NMR (100 MHz, CDCl<sub>3</sub>) δ 148.5, 109.7, 42.6, 37.1, 33.9, 32.9, 29.3, 28.0, 22.7. IR (NaCl, Thin Film) 2955, 2870, 2276, 1645, 1468, 1367, 890 cm<sup>-1</sup>.

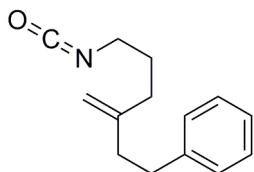

**(6-Isocyanato-3-methylene-hexyl)-benzene (2i).** General procedure yielded a clear liquid (56%). <sup>1</sup>H NMR (400 MHz, CDCl<sub>3</sub>) δ 7.30-7.15 (m, 5H), 4.82 (s, 1H), 4.78 (s, 1H), 3.29 (t, *J* = 6.5 Hz, 2H), 2.74 (t, *J* = 7.5 Hz, 2H), 2.30 (t, *J* = 7.5 Hz, 2H), 2.13 (t, *J* = 7.0 Hz, 2H), 1.74 (tt, *J* = 7.0, 7.0 Hz, 2H). <sup>13</sup>C NMR (100 MHz, CDCl<sub>3</sub>) δ 147.6, 142.1, 128.6, 128.5, 126.1, 110.6, 42.6, 37.9, 34.5, 33.2, 29.3. IR (NaCl, Thin Film) 2941, 2277, 1645, 1496, 1454, 1355, 893 cm<sup>-1</sup>.

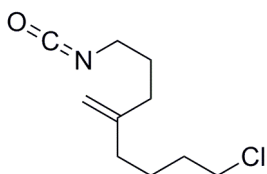

**8-Chloro-1-isocyanato-4-methylene-octane (2n).** General procedure yielded a clear liquid (75%). <sup>1</sup>H NMR (400 MHz, CDCl<sub>3</sub>) δ 4.76 (s, 1H), 4.74 (s, 1H), 3.52 (t, *J* = 7.0 Hz, 2H), 3.29 (t, *J* = 8.0 Hz, 2H), 2.08 (t, *J* = 7.0 Hz, 2H), 2.01 (t, *J* = 7.5 Hz, 2H), 1.79-1.68 (m, 4H), 1.56 (tt, *J* = 8.0 Hz, 2H). <sup>13</sup>C NMR (100 MHz, CDCl<sub>3</sub>) δ 147.4, 110.6, 45.1, 42.7, 35.2, 32.8, 32.3, 29.3, 25.0. IR (NaCl, Thin Film) 3026, 2954, 2276, 1603, 1448, 1354, 963 cm<sup>-1</sup>.

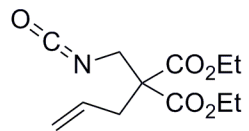

**Diethyl 2-allyl-2-(isocyanomethyl)malonate (2p).** General procedure yielded a clear liquid (86%). <sup>1</sup>H NMR (300 MHz, CDCl<sub>3</sub>) δ 5.61 (ddt, *J* = 17.1, 9.6, 7.5 Hz, 1H), 5.20 (bd, *J* = 15.3 Hz, 1H), 5.17 (bd, *J* = 8.1 Hz, 1H), 4.25 (q, *J* = 7.2 Hz, 4H), 3.77 (s, 2H), 2.75 (d, *J* = 7.5 Hz, 2H), 1.28 (t, *J* = 7.2 Hz, 6H). <sup>13</sup>C NMR (75 MHz, CDCl<sub>3</sub>) δ 168.9, 131.3, 120.5, 62.0, 58.2, 44.8, 35.9, 14.4. IR (NaCl, Thin Film) 3083, 2976, 2930, 2259, 1737, 1440, 1368, 1224, 1091, 1004, 922 cm<sup>-1</sup>.

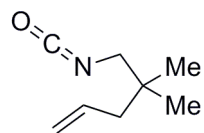

**5-isocyanato-4,4-dimethylpent-1-ene (2q).** General procedure yielded a clear liquid (42%). <sup>1</sup>H NMR (400 MHz, CDCl<sub>3</sub>) δ 5.73 (ddt, *J* = 17.1, 10.0, 7.2 Hz, 1H), 5.06 (bd, *J* = 6.8 Hz, 1H), 5.03 (bd, *J* = 10.0 Hz, 1H), 3.05 (s, 2H), 1.99 (d, *J* = 7.6 Hz, 2H), 0.90 (s, 6H). <sup>13</sup>C NMR (100 MHz, CDCl<sub>3</sub>) δ 134.2, 118.3, 53.2, 43.8, 35.4, 24.8. IR (NaCl, Thin Film) 3078, 2950, 2930, 2264, 2131, 1711, 1629, 1469, 1342 cm<sup>-1</sup>.

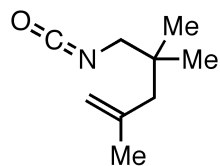

**5-isocyanato-2,4,4-trimethylpent-1-ene (2r).** General procedure yielded a colorless liquid (78%). <sup>1</sup>H NMR (300 MHz, CDCl<sub>3</sub>) δ 4.90 (d, *J* = 1.0 Hz, 1H), 4.68 (d, *J* = 1.0 Hz, 1H), 3.12 (s, 2H), 2.00 (s, 2H), 1.78 (s, 3H), 0.95 (s, 6H). <sup>13</sup>C NMR (75 MHz, CDCl<sub>3</sub>) δ 142.5, 115.2, 53.5, 46.8, 36.0, 25.6, 25.4. IR (NaCl, Thin Film) 3068, 2960, 2929, 2868, 2269, 1634, 1465, 886 cm<sup>-1</sup>.

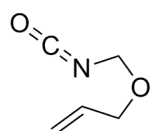

**3-(isocyanatomethoxy)prop-1-ene (2s).** General procedure yielded a clear liquid (36%). <sup>1</sup>H NMR (400 MHz, CDCl<sub>3</sub>) δ 5.88 (ddt, *J* = 17.2, 11.6, 5.6 Hz, 1H), 5.32 (bd, *J* = 18.8 Hz, 1H), 5.24 (bd, *J* = 10.4 Hz, 1H), 4.79 (s, 2H), 4.10 (d, *J* = 8.4 Hz, 2H). <sup>13</sup>C NMR (100 MHz, CDCl<sub>3</sub>) δ 133.2, 118.8, 74.6, 70.1. IR (NaCl, Thin Film) 2863, 2254, 2136, 1731, 1183, 1055 cm<sup>-1</sup>.

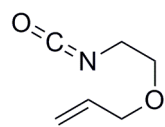

**3-(2-isocyanatoethoxy)prop-1-ene (2t).** General procedure yielded a clear liquid (48%). <sup>1</sup>H NMR (400 MHz, CDCl<sub>3</sub>) δ 5.90 (ddt, *J* = 16.0, 10.4, 5.6 Hz, 1H), 5.28 (dd, *J* = 17.2, 1.6 Hz, 1H), 4.03 (bd, *J* = 5.6 Hz, 1H), 3.55 (t, *J* = 5.2 Hz, 2H), 3.39 (t, *J* = 5.2 Hz, 2H). <sup>13</sup>C NMR (100 MHz, CDCl<sub>3</sub>) δ 134.3, 117.7, 72.3, 69.3, 43.5. IR (NaCl, Thin Film) 2929, 2863, 2259, 2171, 1639, 1562, 1260, 1102 cm<sup>-1</sup>.

### General Procedure for Rhodium-Catalyzed [2+2+2] Cycloadditions:

An oven-dried round bottom flask was charged with [Rh(C<sub>2</sub>H<sub>4</sub>)<sub>2</sub>Cl]<sub>2</sub> (2.3 mg, 0.006 mmol) and ligand (0.012 mmol) and fitted with an oven-dried reflux condenser in an inert atmosphere (N<sub>2</sub>) glove box. Upon removal from the glove box, 1 ml of toluene was added via syringe and the resulting yellow solution was stirred at ambient temperature for 15 min. To this solution, alkyne **1** (0.48 mmol) and isocyanate **2** (0.24 mmol) in 2 ml of toluene was added via syringe. An additional 4 ml of toluene was used to wash down the residue and added to the reaction mixture. The reaction mixture was heated to 110 °C in an oil bath and kept at reflux for 16 h. The reaction mixture was cooled to 23 °C, concentrated in *vacuo*, and purified by flash column chromatography (typically 20:1 EtOAc:MeOH). Evaporation of solvent afforded the analytically pure products. Absolute stereochemistry was established as previously reported.<sup>1,3</sup>

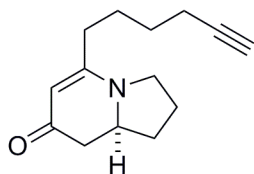

**(S)-5-(hex-5-ynyl)-2,3,8,8a-tetrahydroindolizin-7(1H)-one (4y).** General procedure yielded an amorphous brown solid (48%). [α]<sub>D</sub><sup>20</sup> = -412.7°, *c* = 0.01 g/ml CHCl<sub>3</sub>. HPLC analysis - Chiralcel IA column, 90:10 Hex(0.5% HNEt<sub>2</sub>):iPrOH, 1 ml/min, RT<sub>major</sub> = 22.16 min, RT<sub>minor</sub> = 25.88 min, 330 nm detection light, ee = 90% ee. <sup>1</sup>H NMR (400 MHz, CDCl<sub>3</sub>) δ 4.93 (s, 1H), 3.72 (dddd, *J* = 5.2, 5.2, 10.4, 15.8 Hz, 1H), 3.58 (m, 1H), 3.44 (m, 1H), 2.39 (dd, *J* = 4.8, 15.9 Hz, 1H), 2.30 - 2.20 (m, 6H), 2.07 (m, 1H), 1.94 (m, 1H), 1.88 (m, 1H), 1.72 - 1.55 (m, 5H). <sup>13</sup>C NMR (100 MHz, CDCl<sub>3</sub>) δ 191.6, 163.9, 97.2, 83.7, 68.8, 59.1, 46.6, 41.2, 33.0, 32.4, 27.8, 26.0, 23.7, 18.0. R<sub>f</sub> = 0.15 (20:1 EtOAc:MeOH). IR (NaCl, Thin Film) 2935, 2868, 1614, 1542, 1342, 1301, 1260, 1235 cm<sup>-1</sup>. HRMS (ESI) *m/z* [C<sub>14</sub>H<sub>20</sub>NO]<sup>+</sup> calcd 218.1539, found 218.1541.

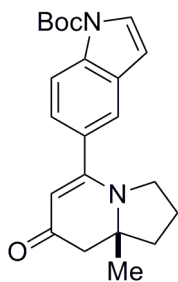

**(S)-5-(8a-Methyl-7-oxo-1,2,3,7,8,8a-hexahydro-indolizin-5-yl)-indole-1-carboxylic acid tert-butyl ester (9h).** General procedure yielded a clear syrup (85%). 91% ee by HPLC (Chiralcel ODH, Hex:iPrOH 85:15, 1 ml/min, RT<sub>major</sub> = 12.0 min, RT<sub>minor</sub> = 10.2 min). [α]<sub>D</sub><sup>20</sup> = +230.0°, *c* = 0.01 g/ml CHCl<sub>3</sub>. <sup>1</sup>H NMR (400 MHz, CDCl<sub>3</sub>) δ 8.12 (d, *J* = 8.0 Hz, 1H), 7.60 (d, *J* = 3.5 Hz, 1H), 7.56 (s, 1H), 7.28 (dd, *J* = 8.5, 1.5 Hz, 1H), 7.55 (d, *J* = 4.0 Hz, 1H), 5.11 (s, 1H), 3.57 (ddd, *J* = 10.5, 6.5, 6.5 Hz, 1H), 3.15 (ddd, *J* = 11.0, 7.0, 7.0 Hz, 1H), 2.68 (d, *J* = 16.0 Hz, 1H), 2.29 (d, *J* = 16.0 Hz, 1H), 2.02-1.88 (m, 4H), 1.63 (s, 9H), 1.40 (s, 3H). <sup>13</sup>C NMR (100 MHz, CDCl<sub>3</sub>) δ 191.9, 162.4, 149.7, 136.1, 131.4, 130.6, 127.2, 124.2, 120.9, 115.3, 107.6, 99.4, 84.4, 62.8, 50.5, 47.9, 39.9, 28.3, 24.1, 22.1. R<sub>f</sub> = 0.26 (EtOAc). IR (NaCl, Thin Film) 2973, 2872, 1737, 1626, 1528, 1449, 1371, 1336, 1282, 1231, 1159, 1085, 768 cm<sup>-1</sup>. MS (EI) *m/e* (rel intensity) 367 (100), 366 (49), 311 (80), 310 (22), 309 (13), 295 (22), 154 (15). HRMS (ESI) *m/z* [C<sub>22</sub>H<sub>27</sub>N<sub>2</sub>O<sub>3</sub>]<sup>+</sup> calcd 367.2022, found 367.2013.

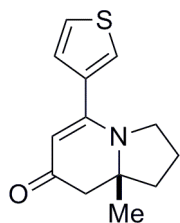

**(S)-8a-Methyl-5-thiophen-3-yl-2,3,8,8a-tetrahydro-1H-indolizin-7-one (9i).** General procedure yielded a clear syrup (78%). 83% *ee* by HPLC (Chiralcel ODH, Hex:*i*PrOH 85:15, 1 ml/min, RT<sub>major</sub> = 16.3 min, RT<sub>minor</sub> = 12.1 min).  $[\alpha]_D^{20} = +280.0^\circ$ ,  $c = 0.009$  g/ml CHCl<sub>3</sub>. <sup>1</sup>H NMR (400 MHz, CDCl<sub>3</sub>)  $\delta$  7.46 (d,  $J = 3.0$  Hz, 1H), 7.32 (dd,  $J = 5.0, 3.0$  Hz, 1H), 7.11 (d,  $J = 5.0$  Hz, 1H), 5.15 (s, 1H), 3.61 (ddd,  $J = 11.0, 6.0, 6.0$  Hz, 1H), 3.33 (ddd,  $J = 11.0, 7.0, 3.5$  Hz, 1H), 2.64 (d,  $J = 16.5$  Hz, 1H), 2.27 (d,  $J = 16.5$  Hz, 1H), 2.00-1.82 (m, 4H), 1.36 (m, 3H). <sup>13</sup>C NMR (100 MHz, CDCl<sub>3</sub>)  $\delta$  192.0, 156.1, 138.0, 127.4, 126.8, 126.4, 98.8, 62.9, 50.5, 47.8, 39.8, 24.2, 22.0. R<sub>f</sub> = 0.20 (EtOAc). IR (NaCl, Thin Film) 2965, 1618, 1543, 1523, 1463, 1367, 1267 cm<sup>-1</sup>. MS (EI) *m/e* (rel intensity) 234 (100), 233 (35), 218 (14), 154 (18), 138 (5), 137 (9). HRMS (ESI) *m/z* [C<sub>13</sub>H<sub>16</sub>NOS]<sup>+</sup> calcd 234.0953, found 234.0962.

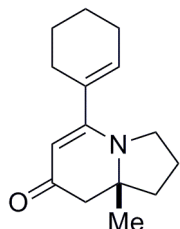

**(S)-5-Cyclohex-1-enyl-8a-methyl-2,3,8,8a-tetrahydro-1H-indolizin-7-one (9p).** General procedure yielded a clear syrup (84%). 91% *ee* by HPLC (Chiralcel ODH, Hex:*i*PrOH 85:15, 1 ml/min, RT<sub>major</sub> = 6.8 min, RT<sub>minor</sub> = 8.0 min).  $[\alpha]_D^{20} = +340^\circ$ ,  $c = 0.01$  g/ml CHCl<sub>3</sub>. <sup>1</sup>H NMR (400 MHz, CDCl<sub>3</sub>)  $\delta$  5.85 (s, 1H), 4.86 (s, 1H), 3.45 (ddd,  $J = 11.0, 7.0, 7.0$  Hz, 1H), 3.32 (ddd,  $J = 11.0, 6.5, 5.0$  Hz, 1H), 2.52 (d,  $J = 16.5$  Hz, 1H), 2.17 (d,  $J = 16.5$  Hz, 1H), 2.15-2.04 (m, 3H), 2.02-1.78 (m, 5H), 1.68-1.50 (m, 4H), 1.22 (s, 3H). <sup>13</sup>C NMR (100 MHz, CDCl<sub>3</sub>)  $\delta$  192.1, 164.1, 135.2, 130.4, 96.8, 62.5, 49.1, 47.7, 39.8, 27.3, 25.3, 23.9, 22.5, 21.9, 21.6. R<sub>f</sub> = 0.30 (EtOAc). IR (NaCl, Thin Film) 2928, 2859, 1626, 1526, 1445, 1262, 1212 cm<sup>-1</sup>. MS (EI) *m/e* (rel intensity) 232 (100), 231 (31), 230 (11), 216 (10), 154 (8), 136 (6). HRMS (ESI) *m/z* [C<sub>15</sub>H<sub>22</sub>NO]<sup>+</sup> calcd 232.1701, found 232.1699.

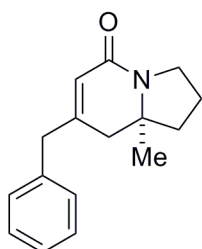

**(R)-7-Benzyl-8a-methyl-2,3,8,8a-tetrahydro-1H-indolizin-5-one (8s).** General procedure yielded an off white syrup (71%). 92% *ee* by HPLC (Chiralcel ODH, Hex:*i*PrOH 85:15, 1 ml/min, RT<sub>major</sub> = 8.5 min, RT<sub>minor</sub> = 11.0 min).  $[\alpha]_D^{20} = +123.0^\circ$ ,  $c = 0.007$  g/ml CHCl<sub>3</sub>. <sup>1</sup>H NMR (400 MHz, CDCl<sub>3</sub>)  $\delta$  7.28 (t,  $J = 7.0$  Hz, 2H), 7.21 (t,  $J = 7.0$  Hz, 1H), 7.13 (d,  $J = 7.0$  Hz, 2H), 5.76 (t,  $J = 1.0$  Hz, 1H), 3.57-3.45 (m, 2H), 3.47 (d,  $J = 15.0$  Hz, 1H), 3.39 (d,  $J = 15.0$  Hz, 1H), 2.27 (d,  $J = 17.0$  Hz, 1H), 2.15 (d,  $J = 17.0$  Hz, 1H), 1.93-1.86 (m, 3H), 1.75-1.66 (m, 1H), 1.03 (s, 3H). <sup>13</sup>C NMR (100 MHz, CDCl<sub>3</sub>)  $\delta$  163.4, 150.6, 137.1, 129.4, 128.8, 127.0, 120.9, 60.9, 43.7, 43.4, 41.0, 40.8, 23.6, 21.5. R<sub>f</sub> = 0.48 (EtOAc). IR (NaCl, Thin Film) 2967, 2882, 1661, 1612, 1454, 1430 cm<sup>-1</sup>. HRMS (ESI) *m/z* [C<sub>16</sub>H<sub>20</sub>NO]<sup>+</sup> calcd 242.1539, found 242.1540.

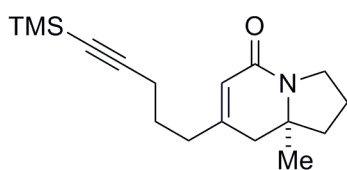

**(R)-8a-Methyl-7-(5-trimethylsilyl-pent-4-ynyl)-2,3,8,8a-tetrahydro-1H-indolizin-5-one (8ae).** General procedure yielded a light yellow syrup (39%). 93% *ee* by HPLC (Chiralcel ADH, Hex:*i*PrOH 90:10, 1 ml/min, RT<sub>major</sub> = 14.0 min, RT<sub>minor</sub> = 11.5 min).  $[\alpha]_D^{20} = +24.0^\circ$ ,  $c = 0.01$  g/ml CHCl<sub>3</sub>. <sup>1</sup>H NMR (400 MHz, CDCl<sub>3</sub>)  $\delta$  5.70 (dd,  $J = 1.5, 3.0$  Hz, 1H), 3.54-3.46 (m, 2H), 2.36 (dd,  $J = 17.0, 3.0$  Hz, 1H), 2.25-2.18 (m, 5H), 2.00-1.89 (m, 3H), 1.79-1.60 (m, 3H), 1.13 (s, 3H), 0.11 (s, 9H). <sup>13</sup>C NMR (100 MHz, CDCl<sub>3</sub>)  $\delta$  163.4, 151.2, 119.9, 106.4, 85.6, 60.8, 43.7, 41.8, 40.9, 35.7, 25.8, 23.6, 21.5, 19.6, 0.3. R<sub>f</sub> = 0.45 (EtOAc). IR (NaCl, Thin Film) 2962, 1663, 1614, 1428, 1249, 842 cm<sup>-1</sup>. HRMS (ESI) *m/z* [C<sub>17</sub>H<sub>28</sub>NOSi]<sup>+</sup> calcd 290.1935, found 290.1936.

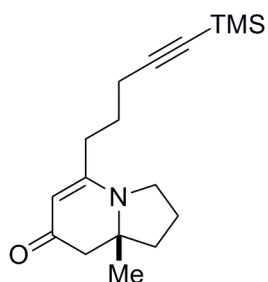

**(S)-8a-Methyl-5-(5-trimethylsilyl-pent-4-ynyl)-2,3,8,8a-tetrahydro-1H-indolizin-7-one (9ae).** From the same reaction above, a light yellow syrup was isolated (6%). 85% ee by HPLC (Chiralcel ADH, Hex:*i*PrOH 80:20, 1 ml/min, RT<sub>major</sub> = 7.7 min, RT<sub>minor</sub> = 8.6 min).  $[\alpha]_D^{20} = +24.0^\circ$ ,  $c = 0.01$  g/ml CHCl<sub>3</sub>. <sup>1</sup>H NMR (400 MHz, CDCl<sub>3</sub>)  $\delta$  4.92 (s, 1H), 3.61 (ddd,  $J = 11.0, 5.0, 5.0$  Hz, 1H), 3.47 (ddd,  $J = 11.0, 8.0, 8.0$  Hz, 1H), 2.49 (d,  $J = 16.0$  Hz, 1H), 2.35-2.25 (m, 4H), 2.07-1.97 (m, 3H), 1.86-1.68 (m, 4H), 1.18 (s, 3H), 0.12 (s, 9H). <sup>13</sup>C NMR (100 MHz, CDCl<sub>3</sub>)  $\delta$  191.1, 162.3, 106.1, 96.2, 86.0, 63.2, 47.9, 46.6, 39.7, 32.7, 29.9, 26.4, 22.4, 20.0, 19.5, 0.3.  $R_f = 0.25$  (EtOAc). IR (NaCl, Thin Film) 2959, 1626, 1536, 1485, 1249, 842 cm<sup>-1</sup>. HRMS (ESI)  $m/z$  [C<sub>17</sub>H<sub>28</sub>NOSi]<sup>+</sup> calcd 290.1935, found 290.1927.

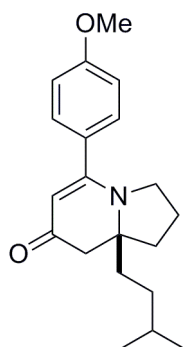

**(S)-5-(4-Methoxy-phenyl)-8a-(3-methyl-butyl)-2,3,8,8a-tetrahydro-1H-indolizin-7-one (10h).** General procedure yielded a light yellow solid (83%). 91% ee by HPLC (Chiralcel ODH, Hex:*i*PrOH 80:20, 1 ml/min, RT<sub>major</sub> = 6.0 min, RT<sub>minor</sub> = 8.4 min).  $[\alpha]_D^{20} = +251.0^\circ$ ,  $c = 0.007$  g/ml CHCl<sub>3</sub>. <sup>1</sup>H NMR (400 MHz, CDCl<sub>3</sub>)  $\delta$  7.34 (d,  $J = 8.5$  Hz, 2H), 6.88 (d,  $J = 8.5$  Hz, 2H), 5.09 (s, 1H), 3.81 (s, 3H), 3.49 (ddd,  $J = 11.0, 7.5, 7.5$  Hz, 1H), 3.24 (ddd,  $J = 11.0, 5.0, 5.0$  Hz, 1H), 2.62 (d,  $J = 16.0$  Hz, 1H), 2.31 (d,  $J = 16.0$  Hz, 1H), 2.10-2.02 (ddd,  $J = 12.5, 8.0, 8.0$  Hz, 1H), 1.90-1.83 (m, 2H), 1.81-1.74 (m, 3H), 1.48 (sept,  $J = 6.5$  Hz, 1H), 1.33-1.27 (m, 1H), 1.16-1.09 (m, 1H), 0.85 (d,  $J = 7.0$  Hz, 6H). <sup>13</sup>C NMR (100 MHz, CDCl<sub>3</sub>)  $\delta$  192.1, 162.0, 161.4, 130.0, 129.4, 114.1, 99.2, 65.6, 55.6, 52.3, 45.8, 36.7, 33.4, 32.1, 28.6, 25.0, 22.8, 22.8.  $R_f = 0.22$  (EtOAc). IR (NaCl, Thin Film) 2944, 1606, 1577, 1508, 1455, 1244, 1175, 1028 cm<sup>-1</sup>.

HRMS (ESI)  $m/z$  [C<sub>20</sub>H<sub>28</sub>NO<sub>2</sub>]<sup>+</sup> calcd 314.2115, found 314.2114.

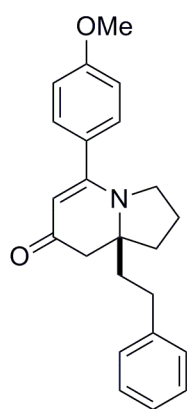

**(S)-5-(4-Methoxy-phenyl)-8a-phenethyl-2,3,8,8a-tetrahydro-1H-indolizin-7-one (10i).** General procedure yielded a light yellow solid (80%). 89% ee by HPLC (Chiralcel ODH, Hex:*i*PrOH 85:15, 1 ml/min, RT<sub>major</sub> = 17.0 min, RT<sub>minor</sub> = 22.9 min).  $[\alpha]_D^{20} = +215.0^\circ$ ,  $c = 0.009$  g/ml CHCl<sub>3</sub>. <sup>1</sup>H NMR (400 MHz, CDCl<sub>3</sub>)  $\delta$  7.31 (d,  $J = 8.5$  Hz, 2H), 7.25-7.20 (m, 2H), 7.18-7.14 (m, 3H), 6.87 (d,  $J = 9.0$  Hz, 2H), 5.13 (s, 1H), 3.80 (s, 2H), 3.53 (ddd,  $J = 11.0, 7.5, 7.5$  Hz, 1H), 3.27 (ddd,  $J = 11.0, 6.0, 5.5$  Hz, 1H), 2.74 (ddd,  $J = 12.0, 12.0, 6.0$  Hz, 1H), 2.70 (d,  $J = 16.0$  Hz, 1H), 2.60 (ddd,  $J = 12.0, 12.0, 6.0$  Hz, 1H), 2.40 (d,  $J = 16.0$  Hz, 1H), 2.22-2.05 (m, 3H), 1.87-1.84 (m, 3H). <sup>13</sup>C NMR (100 MHz, CDCl<sub>3</sub>)  $\delta$  191.9, 162.0, 161.5, 141.7, 129.9, 129.2, 128.7, 128.5, 126.2, 114.1, 99.5, 65.4, 55.6, 52.2, 45.7, 36.9, 36.7, 31.0, 25.0.  $R_f = 0.29$  (EtOAc). IR (NaCl, Thin Film) 2947, 1626, 1605, 1508, 1454, 1244, 1174, 1028 cm<sup>-1</sup>. HRMS (FAB) [C<sub>23</sub>H<sub>26</sub>NO<sub>2</sub>]<sup>+</sup> calcd 348.1953, found 348.1943.

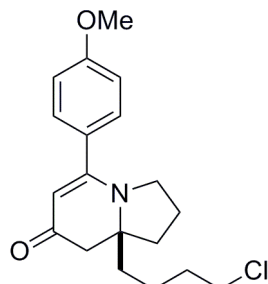

**(S)-8a-(4-Chloro-butyl)-5-(4-methoxy-phenyl)-2,3,8,8a-tetrahydro-1H-indolizin-7-one (10n).** General procedure yielded a light yellow solid (74%). 91% ee by HPLC (Chiralcel ODH, Hex:*i*PrOH 85:15, 1 ml/min, RT<sub>major</sub> = 10.1 min, RT<sub>minor</sub> = 14.0 min).  $[\alpha]_D^{20} = +248.0^\circ$ ,  $c = 0.008$  g/ml CHCl<sub>3</sub>. <sup>1</sup>H NMR (400 MHz, CDCl<sub>3</sub>)  $\delta$  7.33 (d,  $J = 8.5$  Hz, 2H), 6.87 (d,  $J = 8.5$  Hz, 2H), 5.08 (s, 1H), 3.80 (s, 3H), 3.55-3.46 (m, 3H), 3.24 (ddd,  $J = 10.8, 5.5, 5.5$  Hz, 1H), 2.64 (d,  $J = 16.5$  Hz, 1H), 2.29 (d,  $J = 16.5$  Hz, 1H), 2.12-2.05 (m, 1H), 1.91-1.70 (m, 7H), 1.57-1.43 (m, 2H). <sup>13</sup>C NMR (100 MHz, CDCl<sub>3</sub>)  $\delta$  191.9, 162.1, 161.5, 129.9, 129.2, 114.1, 99.3, 65.3, 55.6, 52.3, 45.8, 45.0, 36.7, 33.6, 32.8, 25.0, 21.7.  $R_f = 0.25$  (EtOAc). HRMS (ESI)  $m/z$  [C<sub>19</sub>H<sub>25</sub>ClNO<sub>2</sub>]<sup>+</sup> calcd 334.1568,

found 334.1565.



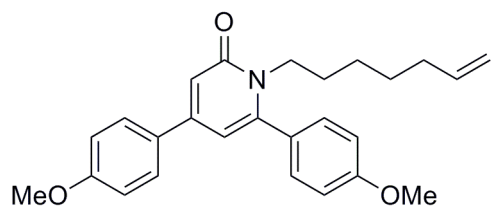

**1-(hept-6-enyl)-4,6-bis(4-methoxyphenyl)-2-pyridone (7).** General procedure yielded amorphous solid (62%).  $^1\text{H}$  NMR (400 MHz,  $\text{CDCl}_3$ )  $\delta$  7.52 (d,  $J = 9.2$  Hz, 2H), 7.28 (d,  $J = 8.8$  Hz, 2H), 6.97 – 6.91 (m, 4H), 6.73 (d,  $J = 2.0$  Hz, 1H), 6.28 (d,  $J = 2.0$  Hz, 1H), 5.69 (dddd,  $J = 16.8, 10.5, 6.6, 6.6$  Hz, 1H), 4.92 – 4.85 (m, 2H), 3.87 (t,  $J = 8.0$  Hz, 2H), 3.85 (s, 3H), 3.81 (s, 3H), 1.90 (q,  $J = 7.2$  Hz, 2H), 1.56 (m, 2H), 1.23 – 1.11 (m, 4H).  $^{13}\text{C}$  NMR (100 MHz,  $\text{CDCl}_3$ )  $\delta$  163.8, 160.9, 160.3, 149.8, 149.5, 139.0, 130.2, 130.0, 128.4, 128.2, 114.5, 114.1, 107.8, 55.6, 45.6, 33.6, 28.7, 28.4, 26.4.  $R_f = 0.54$  (EtOAc). IR (NaCl,  $\text{CDCl}_3$ ) 1652, 1609, 1586, 1508, 1463, 1251, 1179, 1030  $\text{cm}^{-1}$ . HRMS (ESI)  $m/z$  [ $\text{C}_{26}\text{H}_{29}\text{NO}_3$ ] $^+$  calcd 403.21474, found 403.21447.

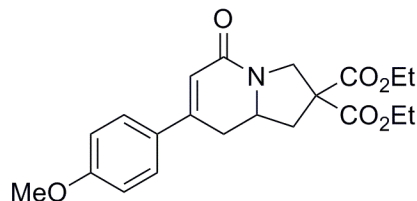

**Diethyl 7-(4-methoxyphenyl)-5-oxo-8,8a-dihydroindolizine-2,2-dicarboxylate (11p).** General procedure yielded a brown oil (35%). 74% ee by HPLC (Chiralcel OJH, Hex:*i*PrOH 80:20, 1 ml/min,  $\text{RT}_{\text{major}} = 20.6$  min,  $\text{RT}_{\text{minor}} = 24.8$  min).  $^1\text{H}$  NMR (400 MHz,  $\text{CDCl}_3$ )  $\delta$  7.42 (d,  $J = 8.8$  Hz, 2H), 6.90 (d,  $J = 8.8$  Hz, 2H), 6.21 (d,  $J = 2.4$  Hz, 1H), 4.23 (q,  $J = 7.2$  Hz, 4H), 4.19 (d,  $J = 12.8$  Hz, 1H), 4.11 (d,  $J = 12.8$  Hz, 1H), 3.99 (dddd,  $J = 19.2, 10.4, 4.8, 4.8$  Hz, 1H), 3.82 (s, 3H), 2.93 (dd,  $J = 16.4, 4.4$  Hz, 1H), 2.83 (dd,  $J = 12.8, 5.6$  Hz, 1H), 2.54 (ddd,  $J = 16.4, 14.0, 2.8$  Hz, 1H), 2.27 (dd,  $J = 12.8, 10.8$  Hz, 1H), 1.26 (t,  $J = 7.2$  Hz, 6H).  $^{13}\text{C}$  NMR (100 MHz,  $\text{CDCl}_3$ )  $\delta$  170.4, 169.7, 164.2, 161.0, 148.6, 129.9, 127.5, 118.4, 114.4, 62.5, 57.6, 55.6, 55.5, 50.5, 40.5, 32.9, 14.2.  $R_f = 0.50$  (EtOAc). IR (NaCl,  $\text{CH}_2\text{Cl}_2$ ) 2980, 2945, 2893, 1726, 1650, 1603, 1562, 1516, 1450, 1250, 1178, 1096, 1024  $\text{cm}^{-1}$ . HRMS (ESI)  $m/z$  [ $\text{C}_{21}\text{H}_{26}\text{NO}_6$ ] $^+$  calcd 388.1755, found 388.1737.

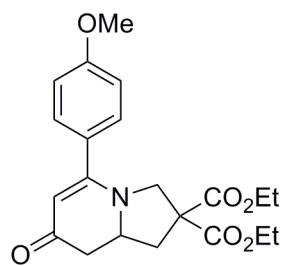

**Diethyl 5-(4-methoxyphenyl)-7-oxo-8,8a-dihydroindolizine-2,2-dicarboxylate (12p).** From the same reaction above, a brown oil was isolated (35%). 91% ee by HPLC (Chiralcel ADH, Hex:*i*PrOH 80:20, 1 ml/min,  $\text{RT}_{\text{major}} = 8.7$  min,  $\text{RT}_{\text{minor}} = 12.1$  min).  $[\alpha]_{\text{D}}^{20} = +399.5^\circ$ ,  $c = 0.018$  g/ml  $\text{CHCl}_3$ .  $^1\text{H}$  NMR (400 MHz,  $\text{CDCl}_3$ )  $\delta$  7.37 (d,  $J = 8.8$  Hz, 2H), 6.93 (d,  $J = 8.8$  Hz, 2H), 5.12 (s, 1H), 4.26 (q,  $J = 7.2$  Hz, 4H), 4.23-4.09 (m, 2H), 3.84 (s, 1H), 3.67 (d,  $J = 11.6$  Hz, 1H), 2.93 (dd,  $J = 13.2, 6.8$  Hz, 1H), 2.55-2.42 (m, 3H), 2.35 (dd,  $J = 13.2, 8.8$  Hz, 1H), 1.29 (t,  $J = 7.2$  Hz, 3H), 1.23 (t,  $J = 7.2$  Hz, 3H).  $^{13}\text{C}$  NMR (100 MHz,  $\text{CDCl}_3$ )  $\delta$  191.9, 169.7, 169.2, 162.2, 161.3, 129.6, 127.9, 114.2, 101.4, 62.6, 62.5, 58.8, 57.5, 55.6, 54.2, 41.6, 38.9, 14.2.  $R_f = 0.17$  (EtOAc). IR (NaCl,  $\text{CH}_2\text{Cl}_2$ ) 2975, 2945, 2924, 2899, 2858, 1731, 1623, 1506, 1465, 1265, 1173, 1096, 1019  $\text{cm}^{-1}$ . HRMS (ESI)  $m/z$  [ $\text{C}_{21}\text{H}_{26}\text{NO}_6$ ] $^+$  calcd 388.1755, found 388.1737.

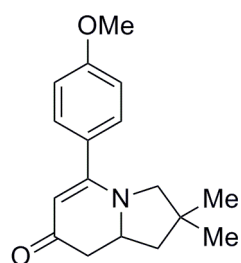

**5-(4-methoxyphenyl)-2,2-dimethyl-2,3,8,8-tetrahydroindolizin-7(1H)-one (12q).** General procedure yielded a brown oil (72%). 83% ee by HPLC (Chiralcel ADH, Hex:*i*PrOH 80:20, 1 ml/min,  $\text{RT}_{\text{major}} = 7.8$  min,  $\text{RT}_{\text{minor}} = 9.2$  min).  $[\alpha]_{\text{D}}^{20} = +490.9^\circ$ ,  $c = 0.018$  g/ml  $\text{CHCl}_3$ .  $^1\text{H}$  NMR (400 MHz,  $\text{CDCl}_3$ )  $\delta$  7.30 (d,  $J = 8.8$  Hz, 2H), 6.92 (d,  $J = 8.4$  Hz, 2H), 5.07 (s, 1H), 4.20 (m, 1H), 3.83 (s, 3H), 3.35 (d,  $J = 10.8$  Hz, 1H), 3.02 (d,  $J = 10.8$  Hz, 1H), 2.48 (dd,  $J = 16.0, 16.0$  Hz, 1H), 2.41 (dd,  $J = 16.0, 5.2$  Hz, 1H), 2.07 (dd,  $J = 12.4, 6.8$  Hz, 1H), 1.61 (dd,  $J = 12.4, 9.2$  Hz, 1H), 1.15 (s, 3H), 1.12 (s, 3H).  $^{13}\text{C}$  NMR (100 MHz,  $\text{CDCl}_3$ )  $\delta$  192.3, 162.9, 161.0, 129.5, 128.5, 114.1, 100.2, 61.6, 58.0, 55.6, 46.2, 42.1, 37.9, 26.9.  $R_f = 0.17$  (EtOAc). IR (NaCl,  $\text{CH}_2\text{Cl}_2$ ) 2955, 2868, 1603, 1506, 1465, 1296, 1260, 1173, 1019  $\text{cm}^{-1}$ . HRMS (ESI)  $m/z$  [ $\text{C}_{17}\text{H}_{22}\text{NO}_2$ ] $^+$  calcd 272.1645, found 272.1641.



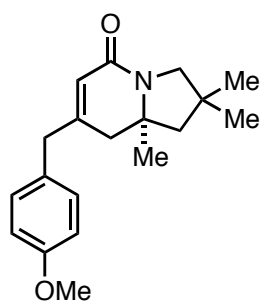

**(R)-7-(4-methoxybenzyl)-2,2,8a-trimethyl-2,3,8,8a-tetrahydro-1H-indolizin-5-one (11r).** General procedure yielded a clear syrup (21%). 52% ee by HPLC (Chiralcel ADH, Hex:*i*PrOH 90:10, 1 mL/min, RT<sub>major</sub> = 17.6 min, RT<sub>minor</sub> = 14.5 min). <sup>1</sup>H NMR (300 MHz, CDCl<sub>3</sub>) δ 7.07 (d, *J* = 8.4 Hz, 2H), 6.85 (d, *J* = 8.4 Hz, 2H), 5.75 (d, *J* = 1.5 Hz, 1H), 3.79 (s, 3H), 3.71 (d, *J* = 12.1, 1H), 3.45-3.31 (ABq, 2H), 3.01 (d, *J* = 12.1 Hz, 1H), 2.37 (d, *J* = 17.0 Hz, 1H), 2.06 (d, *J* = 17.0 Hz, 1H), 1.73 (s, 2H), 1.14 (s, 3H), 1.12 (s, 3H), 1.07 (s, 3H).

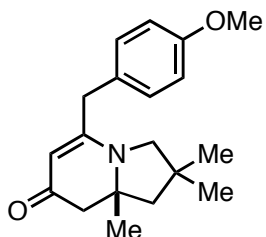

**(S)-5-(4-methoxybenzyl)-2,2,8a-trimethyl-2,3,8,8a-tetrahydro-1H-indolizin-7-one (12r).** General procedure yielded an off white solid (44%). 94% ee by HPLC (Chiralcel ADH, Hex:*i*PrOH 90:10, 1 mL/min, RT<sub>major</sub> = 17.7 min, RT<sub>minor</sub> = 19.7 min). [α]<sub>D</sub><sup>20</sup> = 111.7°, *c* = 0.010 g/mL CHCl<sub>3</sub>. <sup>1</sup>H NMR (300 MHz, CDCl<sub>3</sub>) δ 7.10 (d, *J* = 8.8 Hz, 2H), 6.84 (d, *J* = 8.8 Hz, 2H), 4.97 (s, 1H), 3.79 (s, 3H), 3.53-3.42 (ABq, 2H), 3.19 (d, *J* = 11.0 Hz, 1H), 2.92 (d, *J* = 11.0 Hz, 1H), 2.66 (d, *J* = 16.1 Hz, 1H), 2.25 (d, *J* = 16.1 Hz, 1H), 1.74 (s, 2H), 1.24 (s, 3H), 1.07 (s, 3H), 1.05 (s, 3H). <sup>13</sup>C NMR (75 MHz, CDCl<sub>3</sub>) δ 191.8, 160.7, 158.7, 129.7, 127.9, 114.4, 98.3, 64.2, 59.5, 55.5, 53.5, 48.9, 40.2, 38.8, 29.3, 27.8, 21.8. IR (NaCl, Thin Film) 2955, 2868, 2832, 1623, 1547, 1506, 1465, 1244, 1178 cm<sup>-1</sup>. MS (EI) *m/e* (rel intensity) 300 (100), 187 (75). HRMS (ESI) *m/z* [C<sub>19</sub>H<sub>26</sub>NO<sub>2</sub>]<sup>+</sup> calcd 300.1958, found 300.1960.

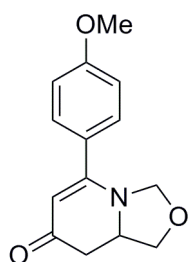

**5-(4-methoxyphenyl)-8,8a-dihydro-1H-oxazolo[3,4-a]pyridine-7(3H)-one (13s).** General procedure yielded a brown oil (37%). 92% ee by HPLC (Chiralcel ADH, Hex:*i*PrOH 80:20, 1 ml/min, RT<sub>major</sub> = 11.4 min, RT<sub>minor</sub> = 13.0 min). [α]<sub>D</sub><sup>20</sup> = +292.6°, *c* = 0.008 g/ml CHCl<sub>3</sub>. <sup>1</sup>H NMR (400 MHz, CDCl<sub>3</sub>) δ 7.39 (d, *J* = 7.8 Hz, 2H), 6.93 (d, *J* = 8.4 Hz, 2H), 5.23 (s, 1H), 4.95 (d, *J* = 3.3 Hz, 1H), 4.70 (d, *J* = 3.6 Hz, 1H), 4.33-4.23 (m, 2H), 3.85 (s, 3H), 3.91-3.80 (m, 1H), 2.66 (dd, *J* = 15.6, 15.6 Hz, 1H), 2.44 (dd, *J* = 16.2, 4.5 Hz, 1H). <sup>13</sup>C NMR (100 MHz, CDCl<sub>3</sub>) δ 191.5, 162.0, 161.0, 129.6, 127.8, 114.4, 100.6, 81.8, 72.2, 55.9, 55.6, 38.9. R<sub>f</sub> = 0.15 (EtOAc). IR (NaCl, CH<sub>2</sub>Cl<sub>2</sub>) 2955, 2873, 1634, 1608, 1578, 1501, 1460, 1378, 1301, 1255, 1168, 1106, 1014 cm<sup>-1</sup>. HRMS (ESI) *m/z* [C<sub>14</sub>H<sub>16</sub>NO<sub>3</sub>]<sup>+</sup> calcd 246.1125, found 246.1113.

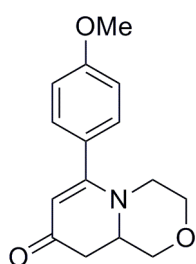

**6-(4-methoxyphenyl)-3,4,9,9a-tetrahydropyrido[2,1-c][1,4]oxazin-8(1H)-one (13t).** General procedure yielded a brown oil (41%). 96% ee by HPLC (Chiralcel ADH, Hex:*i*PrOH 80:20, 1 ml/min, RT<sub>major</sub> = 9.32 min, RT<sub>minor</sub> = 11.30 min). [α]<sub>D</sub><sup>20</sup> = -28.1°, *c* = 0.013 g/ml CHCl<sub>3</sub>. <sup>1</sup>H NMR (400 MHz, CDCl<sub>3</sub>) δ 7.21 (d, *J* = 8.8 Hz, 2H), 6.92 (d, *J* = 8.8 Hz, 2H), 5.15 (s, 1H), 3.94 (dd, *J* = 11.2, 3.2 Hz, 1H), 3.85 (m, 1H), 3.83 (s, 3H), 3.64-3.49 (m, 3H), 3.40 (ddd, *J* = 12.8, 2.0, 2.0 Hz, 1H), 2.79 (ddd, *J* = 12.0, 12.0, 3.2 Hz, 1H), 2.37 (d, *J* = 10.4 Hz, 2H). <sup>13</sup>C NMR (100 MHz, CDCl<sub>3</sub>) δ 190.8, 165.9, 160.6, 128.9, 127.8, 114.3, 104.8, 70.9, 67.0, 56.9, 55.6, 48.5, 37.7. R<sub>f</sub> = 0.20 (EtOAc). IR (NaCl, CH<sub>2</sub>Cl<sub>2</sub>) 2965, 2832, 1639, 1603, 1552, 1511, 1429, 1240, 1122 cm<sup>-1</sup>. HRMS (ESI) *m/z* [C<sub>15</sub>H<sub>18</sub>NO<sub>3</sub>]<sup>+</sup> calcd 260.1281, found 260.1276.

### Dimerization of Terminal Alkynes:

An oven-dried round bottom flask was charged with  $[\text{Rh}(\text{cod})\text{Cl}]_2$  or  $[\text{Rh}(\text{C}_2\text{H}_4)_2\text{Cl}]_2$  (0.012 mmol) and ligand (0.048 mmol  $\text{P}(4\text{-MeO-C}_6\text{H}_4)_3$  or 0.024 mmol MonoPhos) and fitted with an oven-dried reflux condenser in an inert atmosphere ( $\text{N}_2$ ) glove box. Upon removal from the glove box, 1 ml of toluene was added via syringe and the resulting yellow solution was stirred at ambient temperature for 15 min. To this solution, alkyne **1** (0.48 mmol) in 2 ml of toluene was added via syringe. An additional 4 ml of toluene was used to wash down the residue and added to the reaction mixture. The reaction mixture was heated to  $110\text{ }^\circ\text{C}$  in an oil bath and kept at reflux for 12 or 16 h. The reaction mixture was cooled to  $23\text{ }^\circ\text{C}$ , concentrated in *vacuo*, and purified by flash column chromatography. Evaporation of solvent afforded the mixture of products.

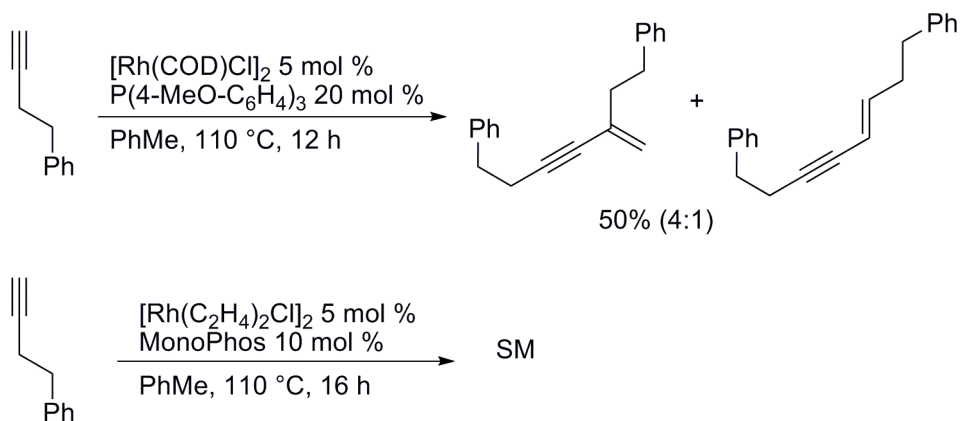

## Competition Experiments of Alkenyl Isocyanates:

An oven-dried round bottom flask was charged with  $[\text{Rh}(\text{C}_2\text{H}_4)_2\text{Cl}]_2$  (2.3 mg, 0.006 mmol) and ligand (0.012 mmol) and fitted with an oven-dried reflux condenser in an inert atmosphere ( $\text{N}_2$ ) glove box. Upon removal from the glove box, 1 ml of toluene was added via syringe and the resulting yellow solution was stirred at ambient temperature for 15 min. To this solution, alkyne **1** (0.24 mmol) and isocyanate **2a** and **2b** (0.24 mmol, 0.24 mmol) in 2 ml of toluene was added via syringe. An additional 4 ml of toluene was used to wash down the residue and added to the reaction mixture. The reaction mixture was heated to 110 °C in an oil bath and kept at reflux for 16 h. The reaction mixture was cooled to 23 °C, concentrated in *vacuo*, and NMR's were taken of crude reaction and can be seen below.

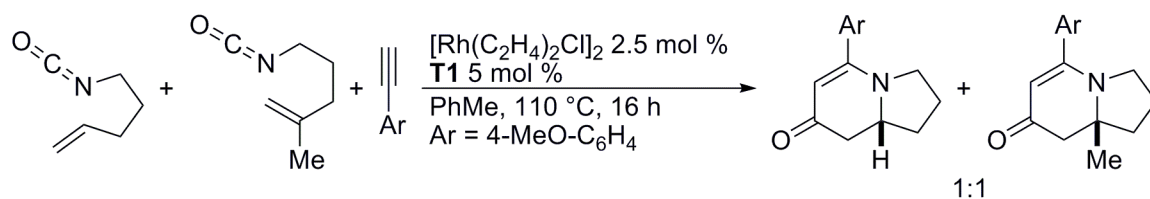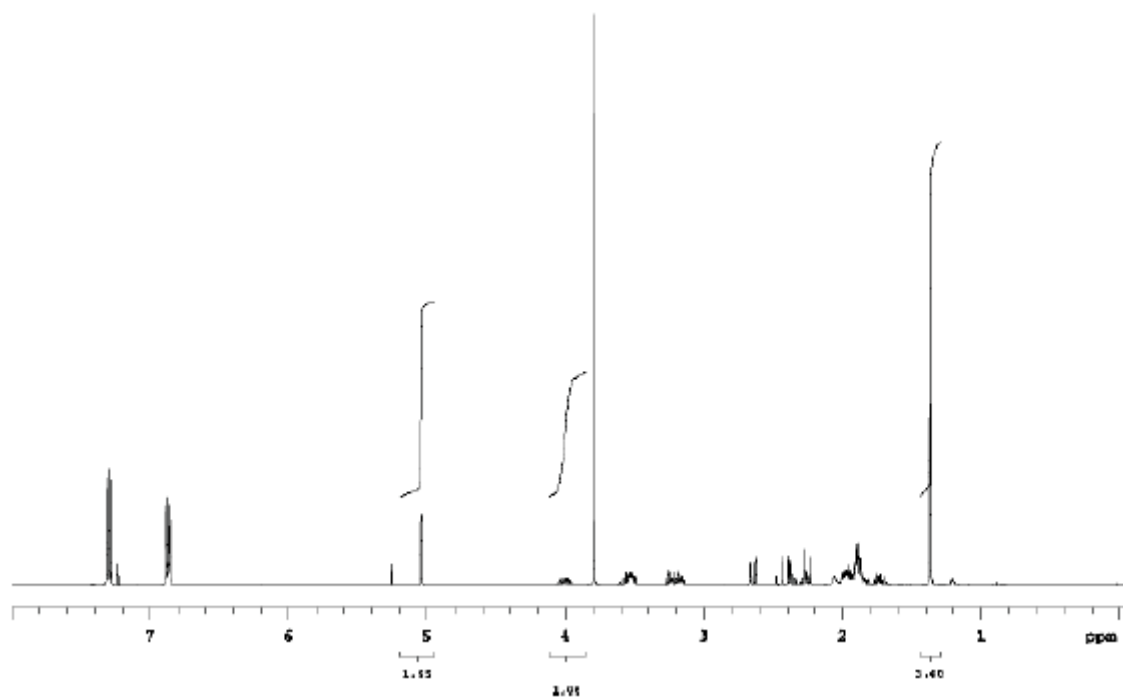

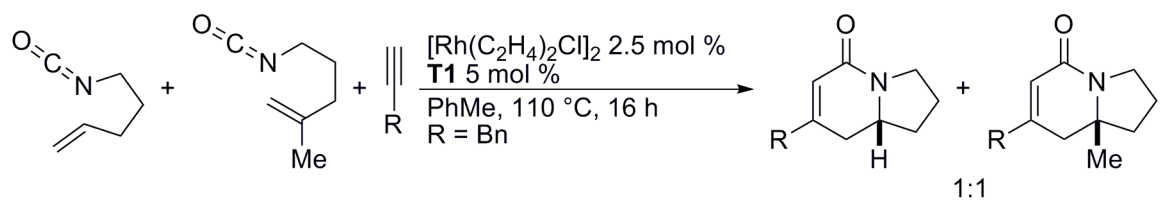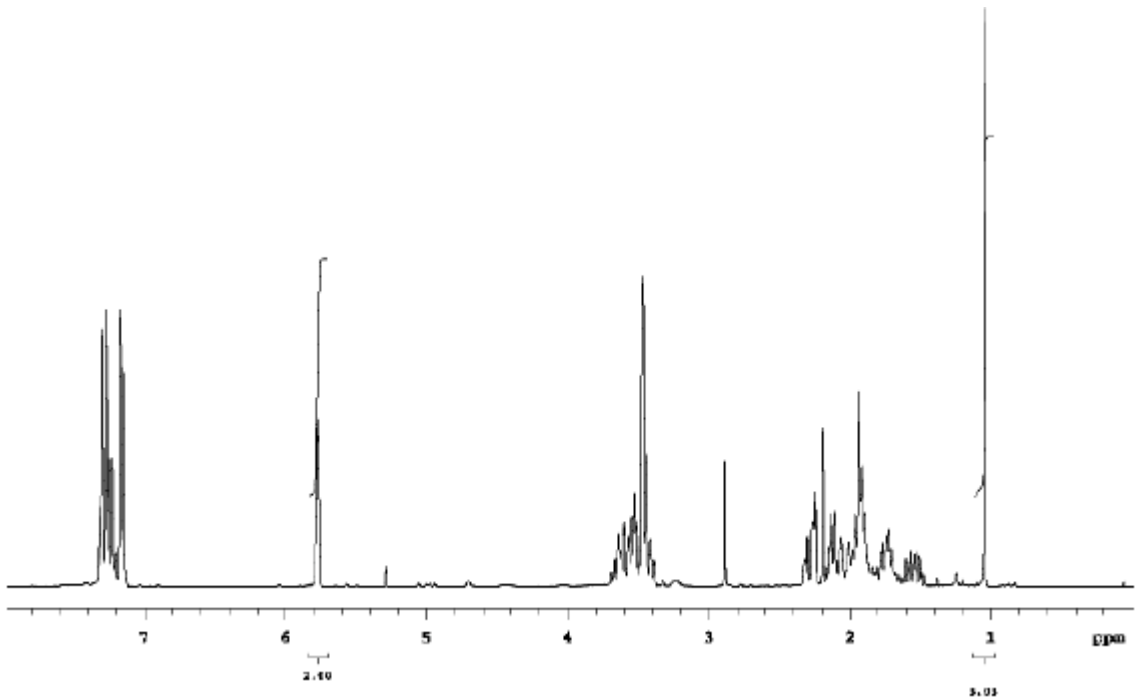

**Synthesis of Rhodium(cod)chloride/phosphoramidite Complexes:**

A 10 ml vial was charged with  $[\text{Rh}(\text{cod})\text{Cl}]_2$  (28 mg, 0.057 mmol) and ligand (0.114 mmol) in an inert atmosphere ( $\text{N}_2$ ) glove box. Upon removal from the glove box, 1 ml of  $\text{CH}_2\text{Cl}_2$  was added via syringe and the resulting yellow solution was layered with heptanes (~2 ml). The cap was loosely sealed and the solvent was allowed to evaporated slowly, yielding X-ray quality crystals.

### Linear Free Energy Relationship

A plot of the Hammett values was made against the log of the ratio of **4/3** using Numbers software. *p*-dimethylaminophenylacetylene was not included in the plot because the sensitivity of the NMR restricted the detection of ratios as it was >20:1.

|          | Hammett Value | Log (4/3)         | 3    | 4    |
|----------|---------------|-------------------|------|------|
| -pNMe2   | -0.83         | 1.27875360095283  | 5    | 95   |
| -pOMe    | -0.27         | 1.27875360095283  | 5    | 95   |
| -mMe     | -0.07         | 0.916941098889173 | 10.8 | 89.2 |
| -H       | 0.00          | 0.845098040014257 | 12.5 | 87.5 |
| -pCl     | 0.23          | 0.580661846626732 | 20.8 | 79.2 |
| -pBr     | 0.23          | 0.505378014283088 | 23.8 | 76.2 |
| -mF      | 0.34          | 0.255542756812029 | 35.7 | 64.3 |
| -pC(O)Me | 0.47          | 0.176091259055681 | 40   | 60   |
| -pCF3    | 0.54          | -0.39946118179257 | 71.5 | 28.5 |

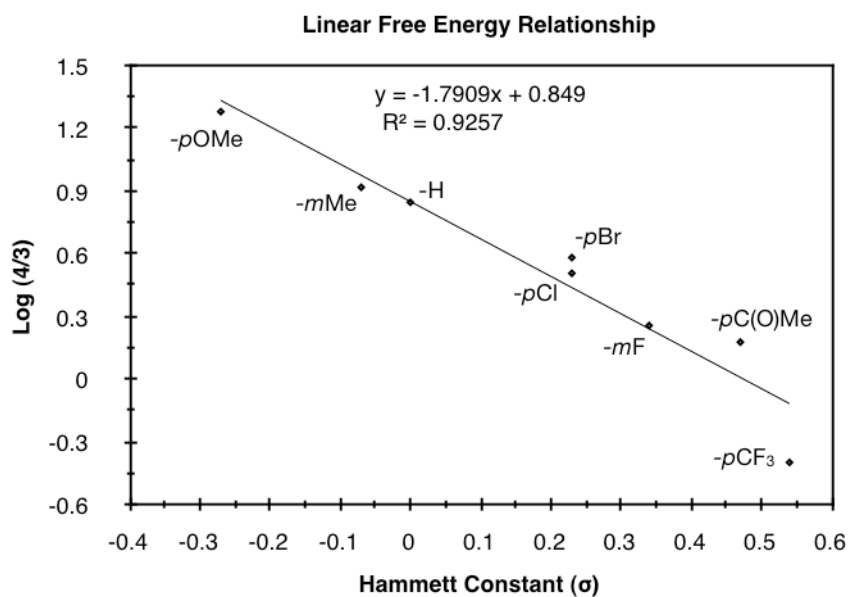

# $^1\text{H}$ NMR and $^{13}\text{C}$ NMR Spectra of New Compounds:

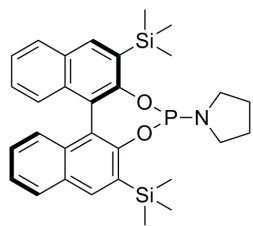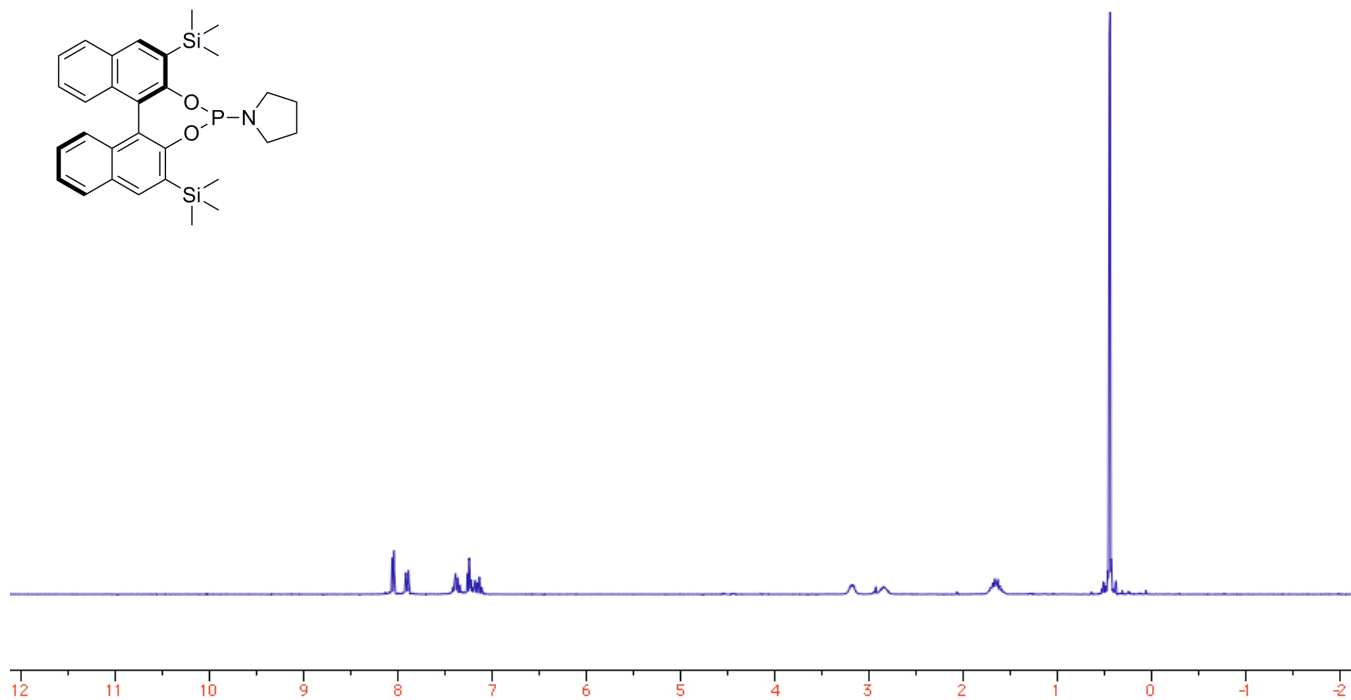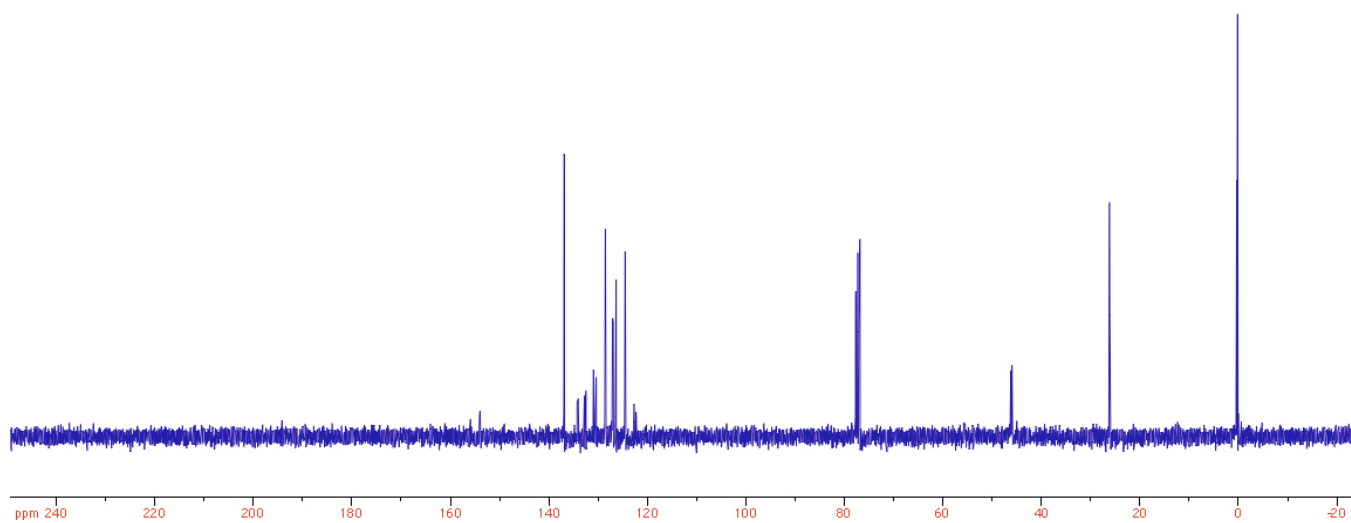

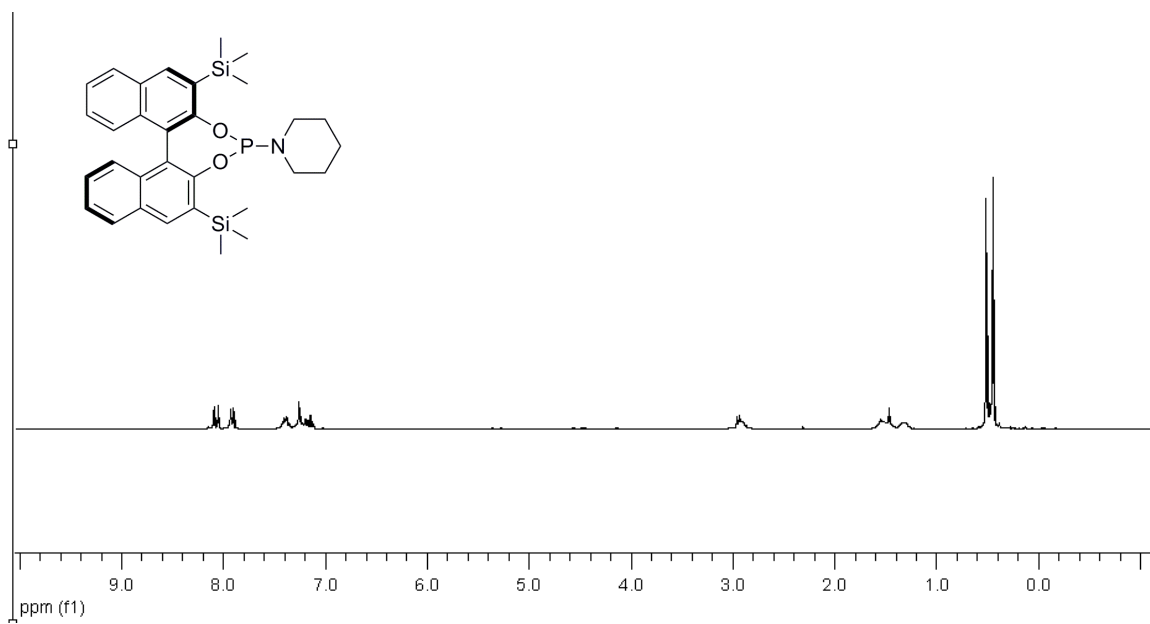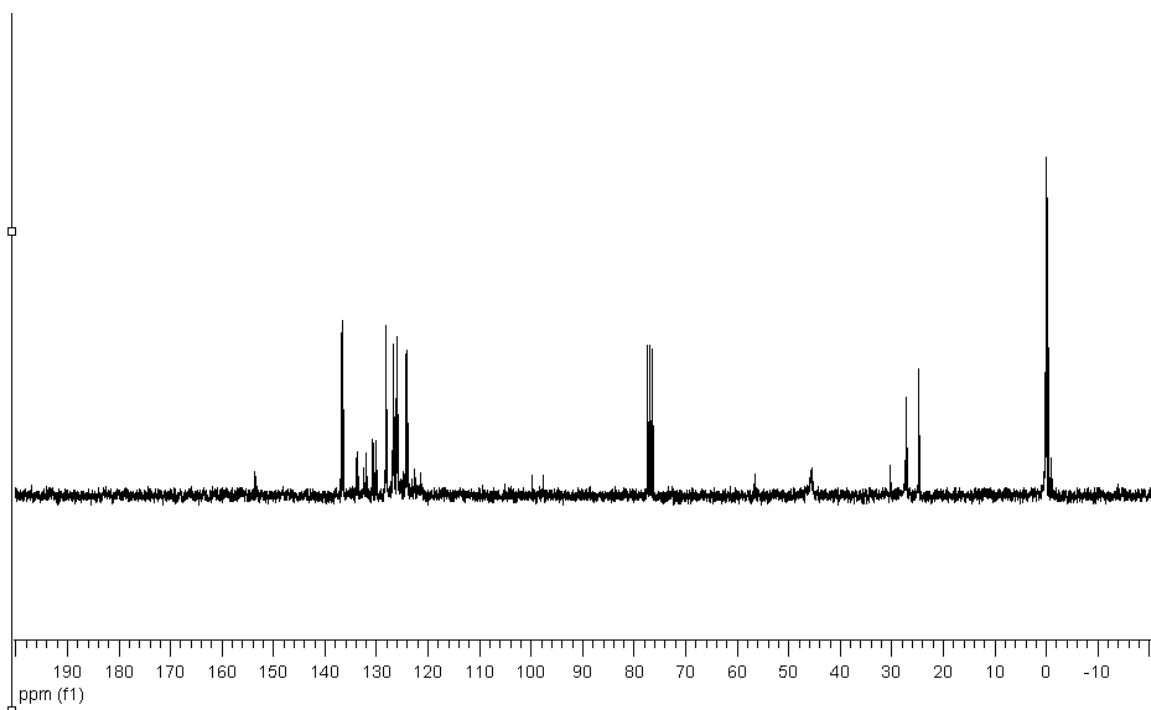



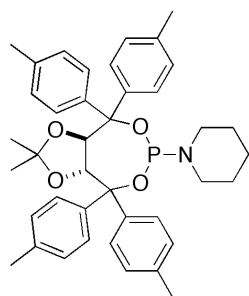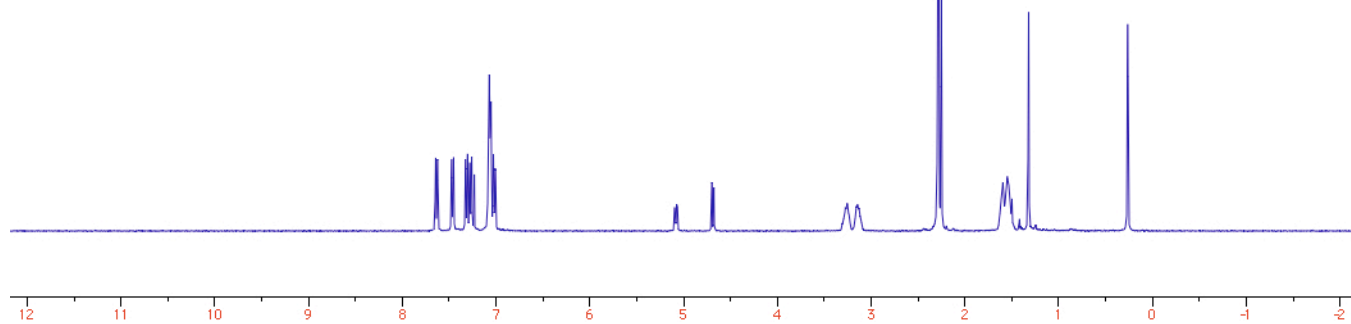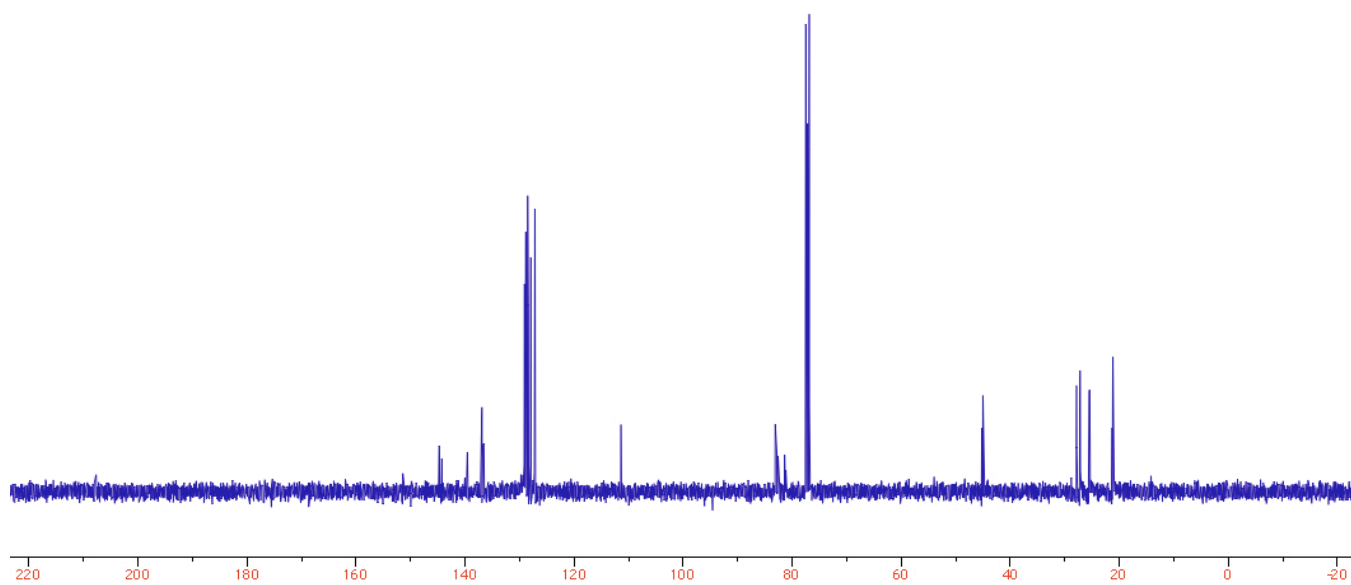



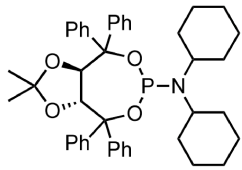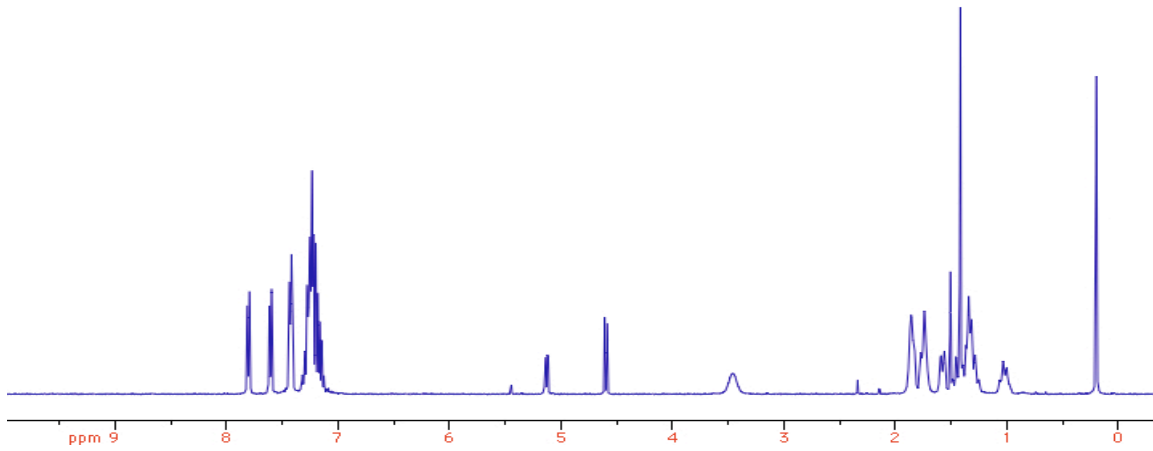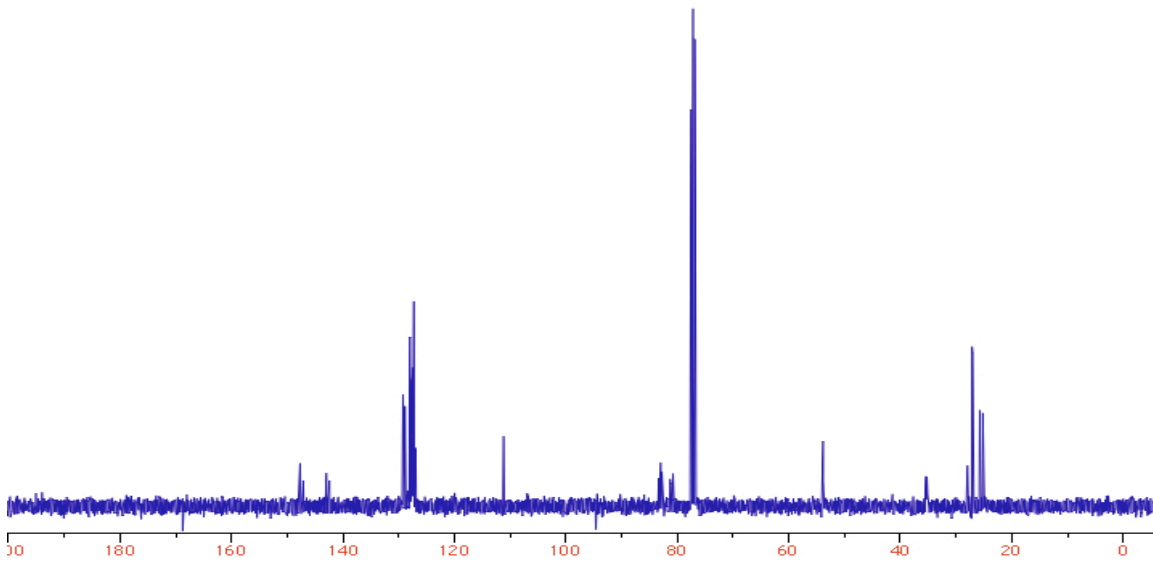

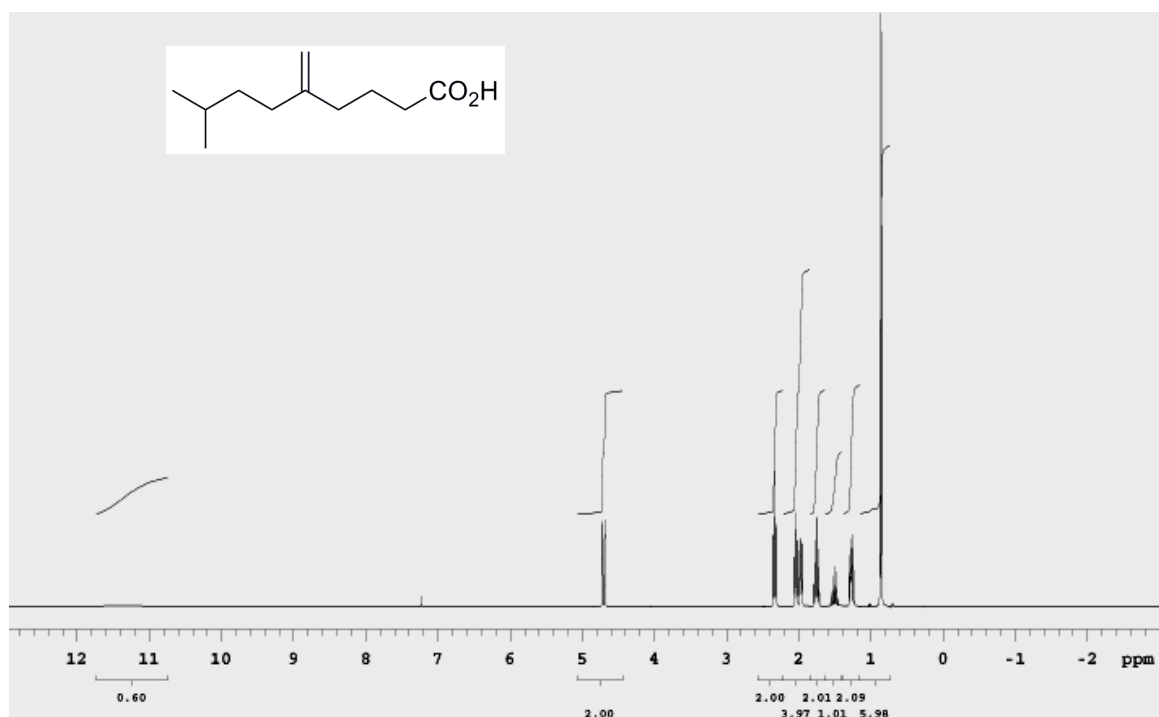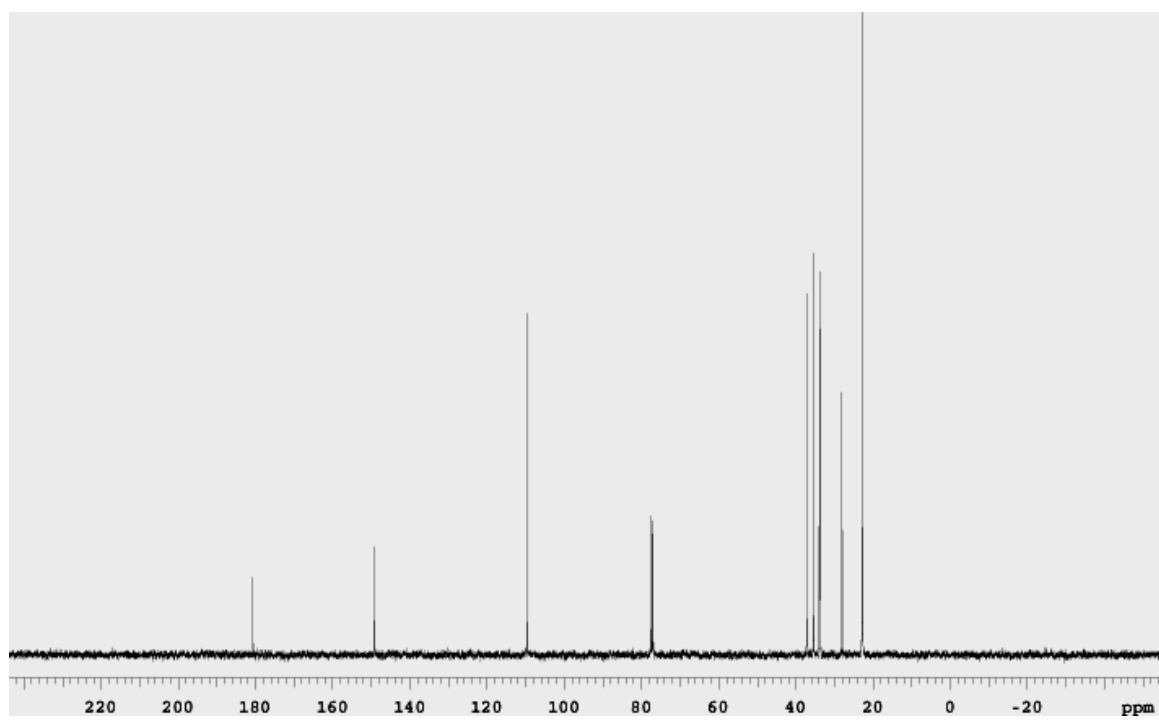

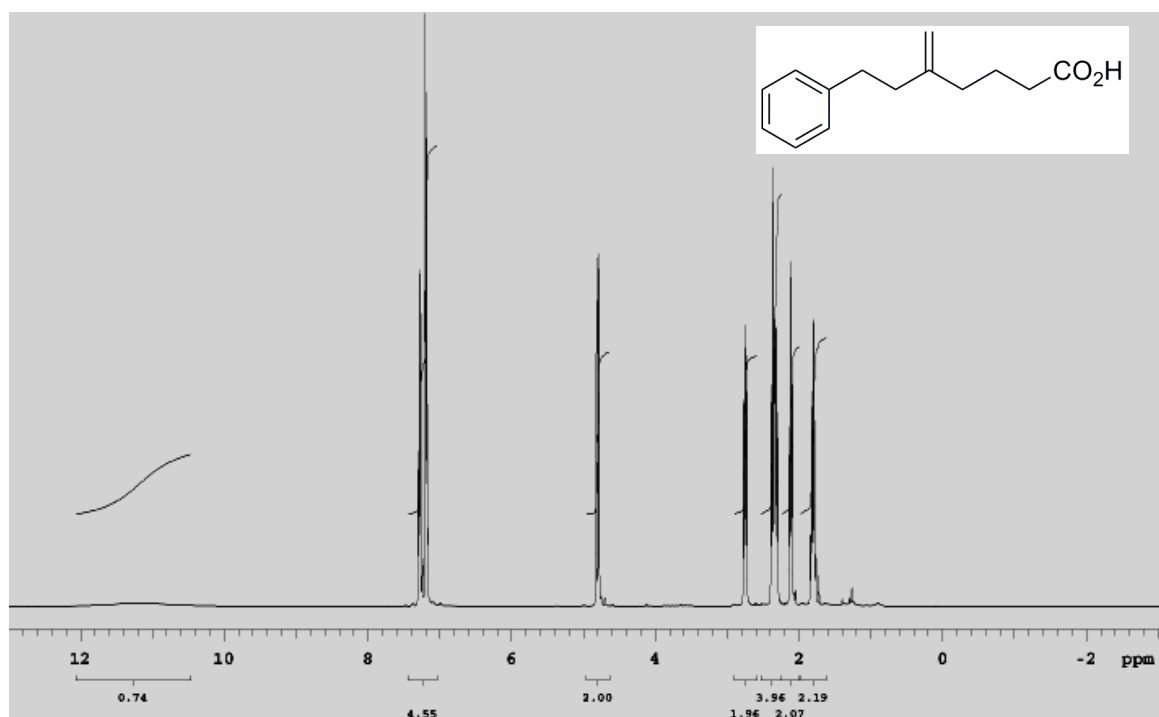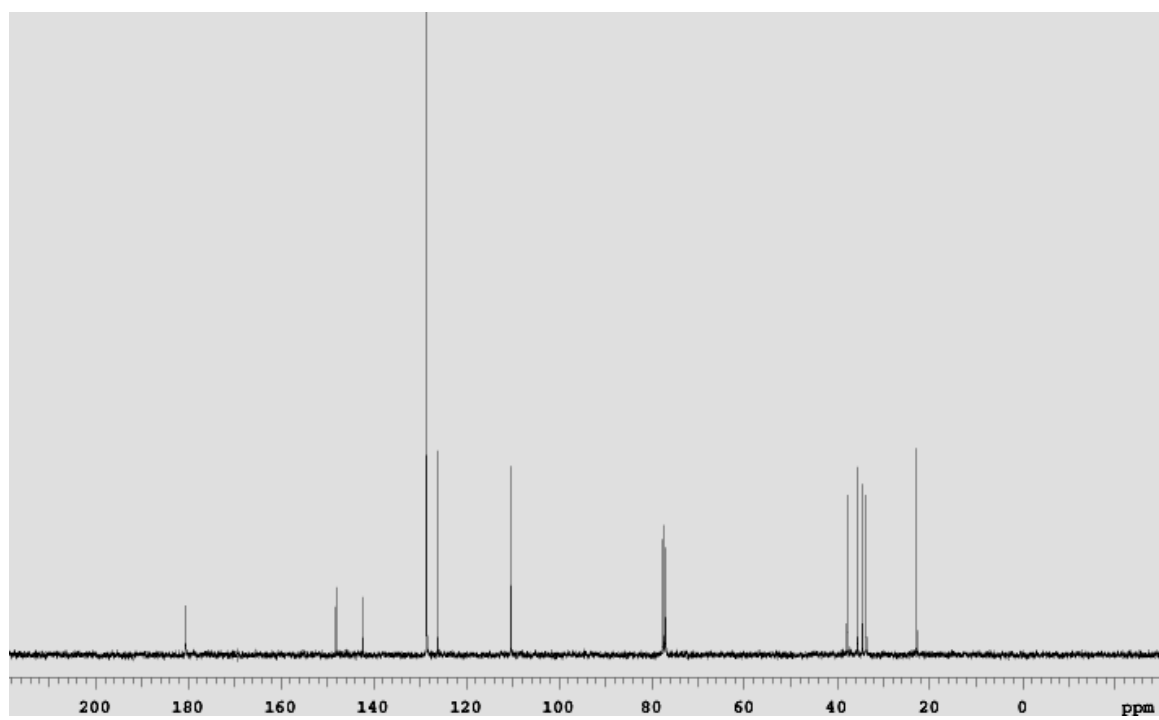

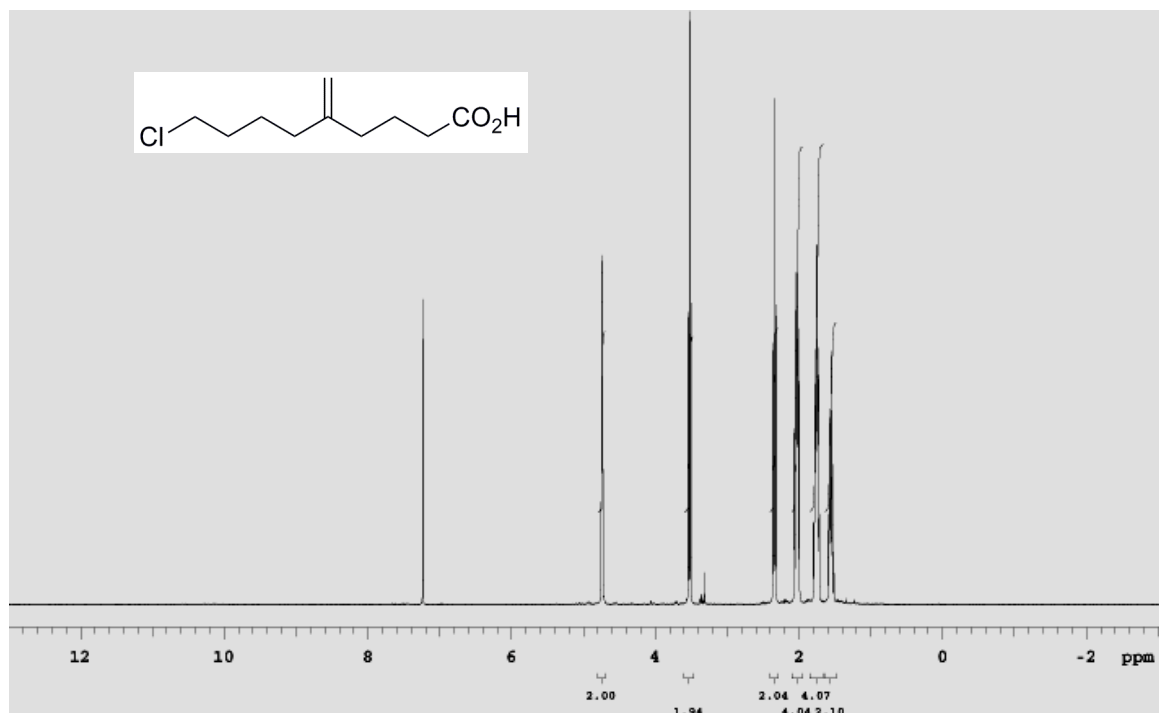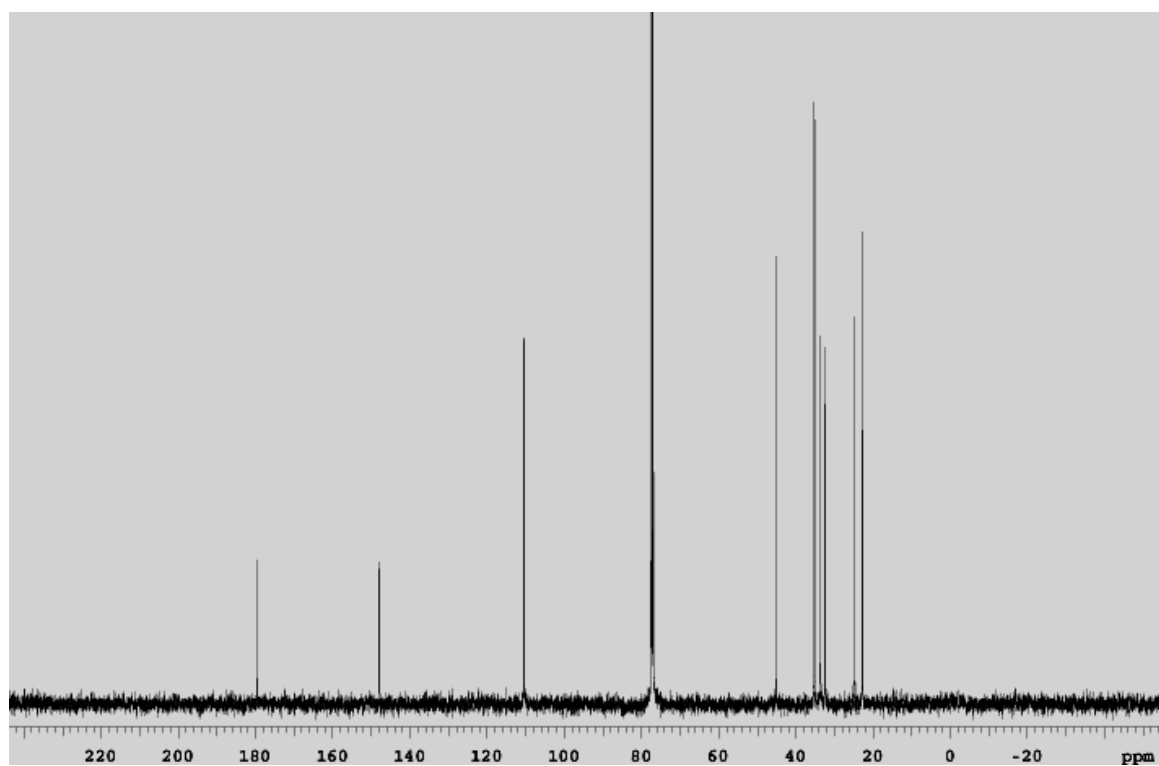

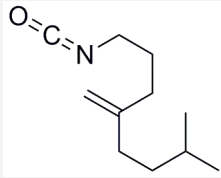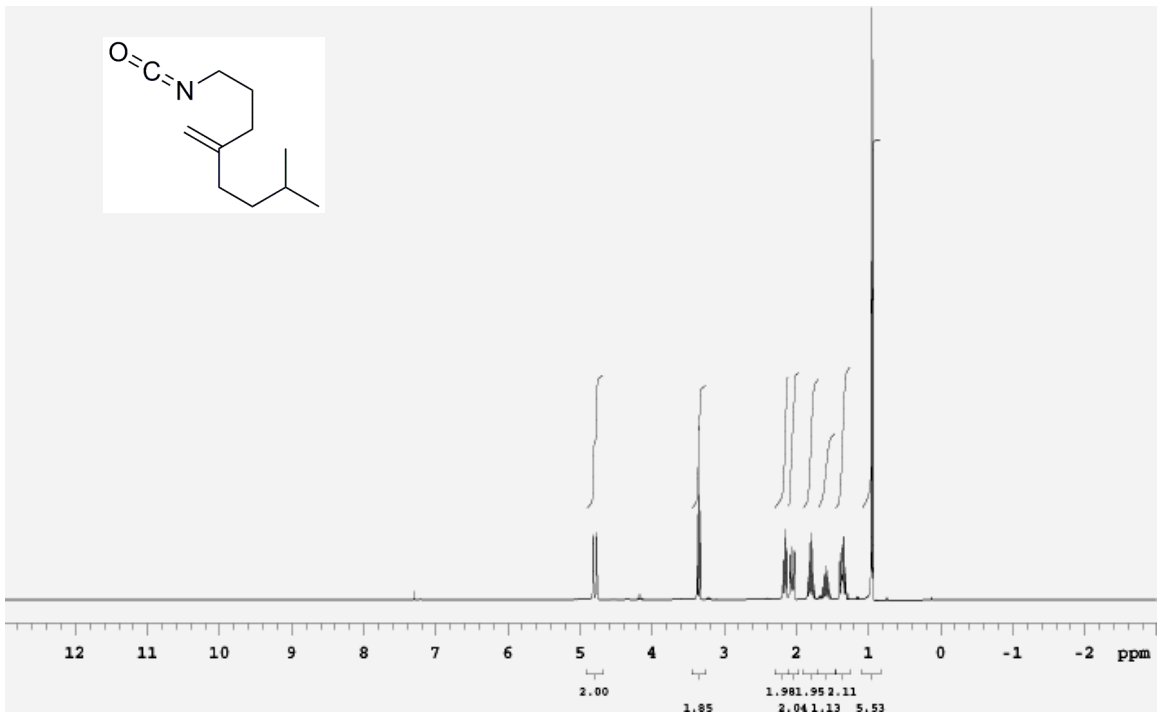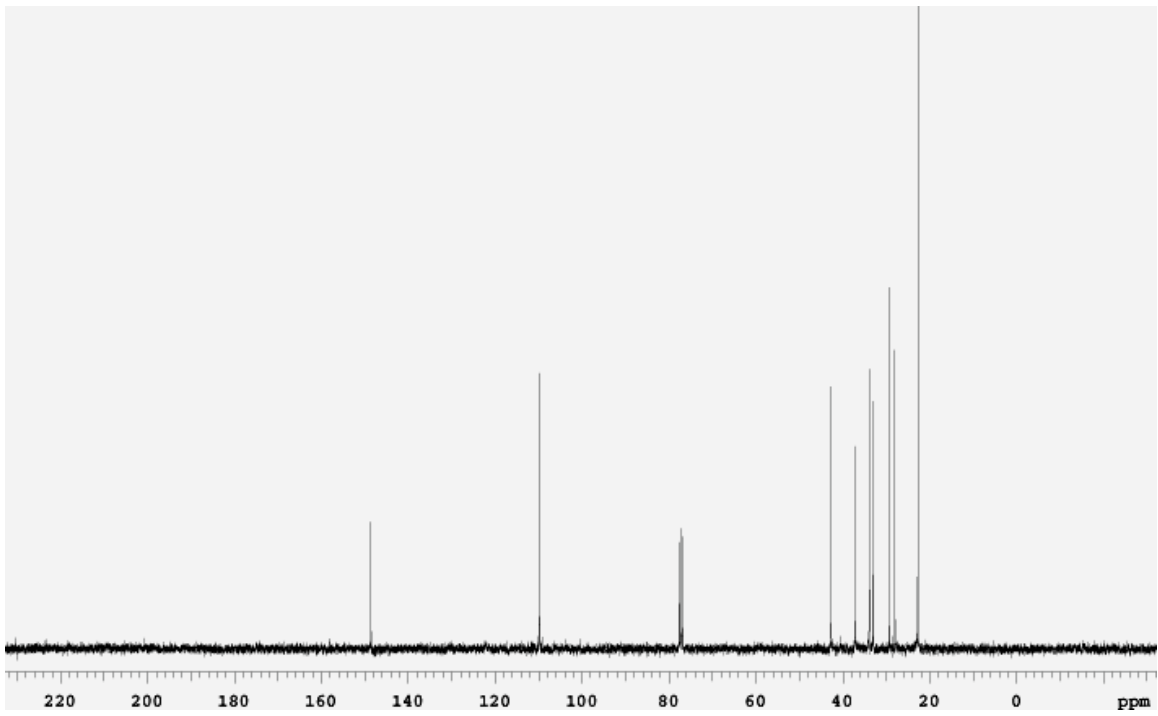



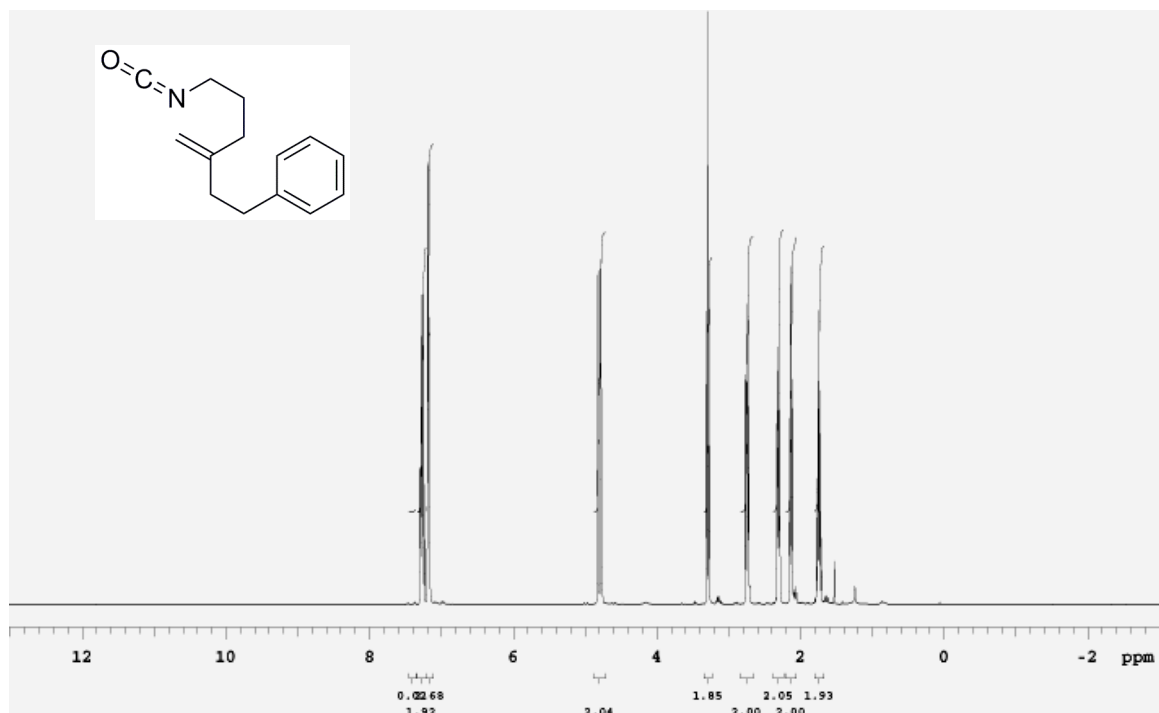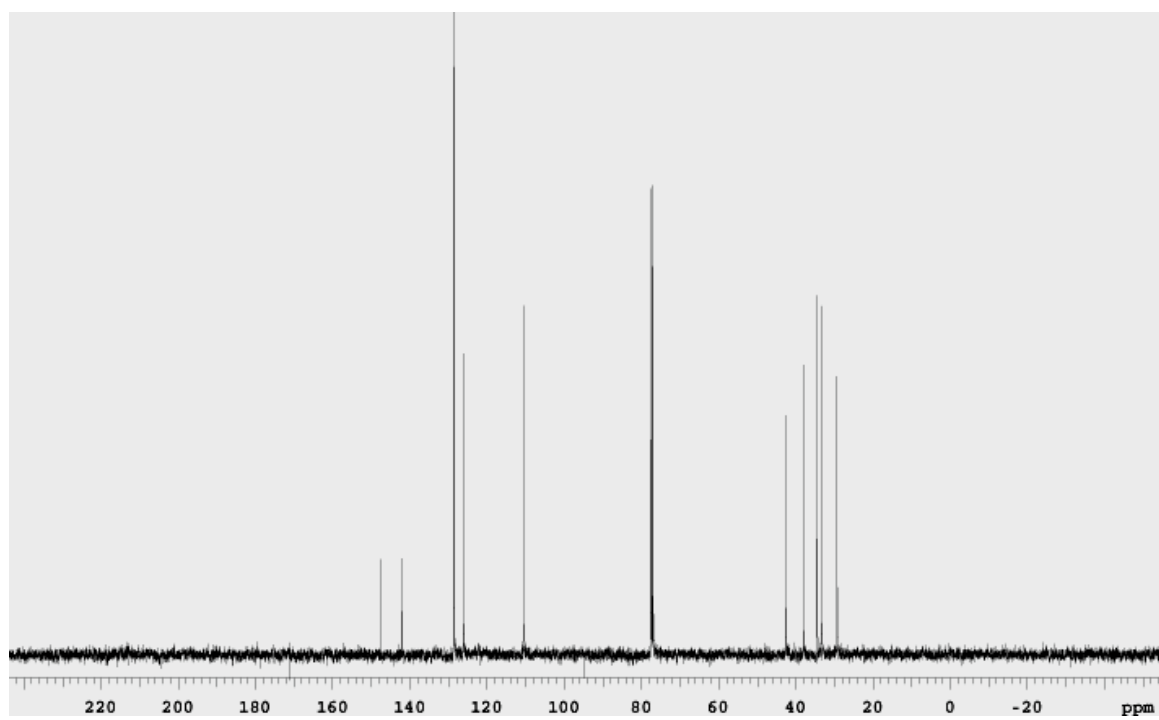

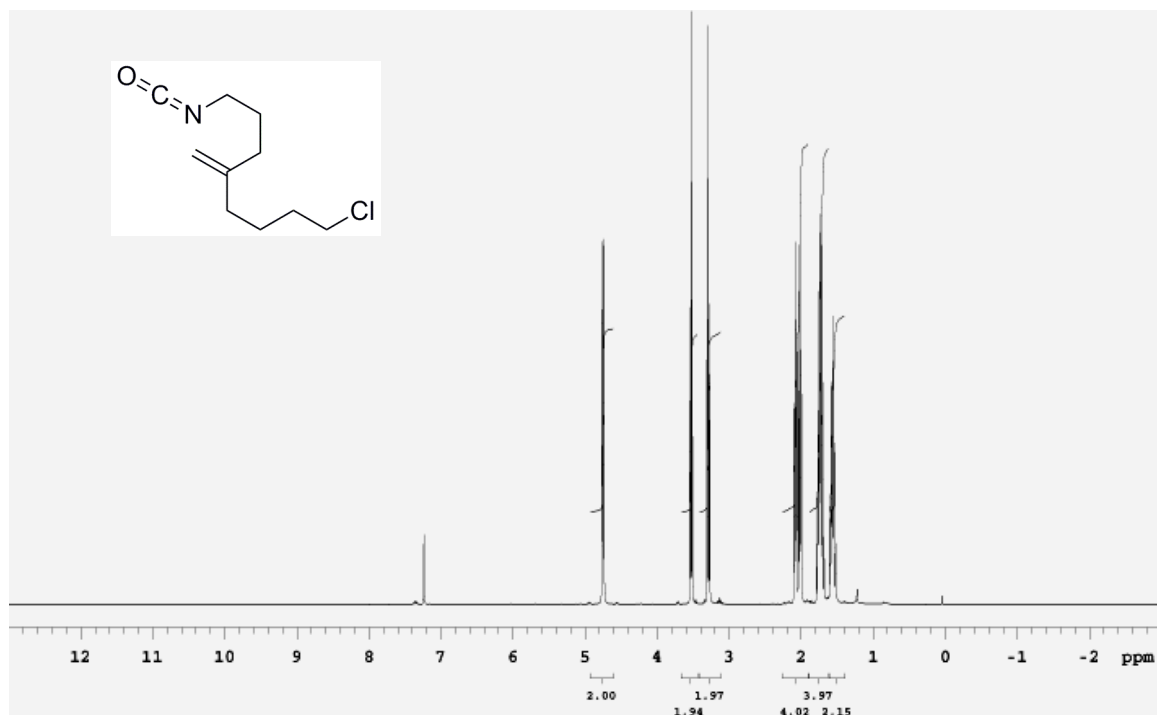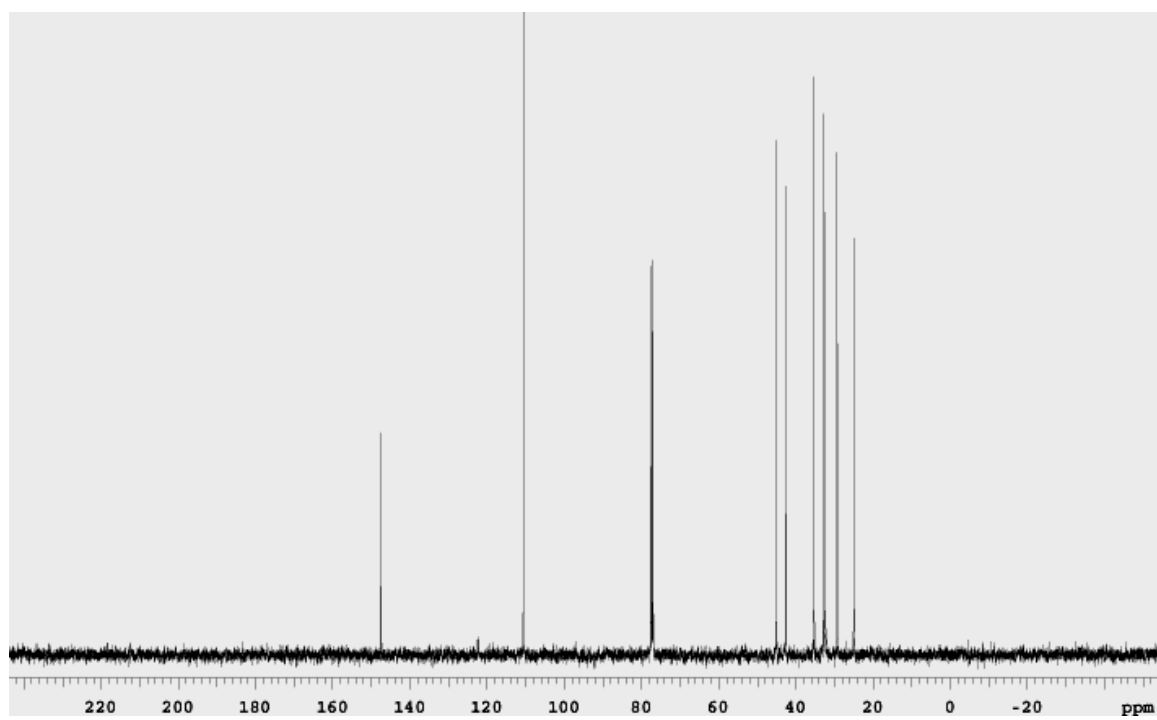

mp-156-isocyanate

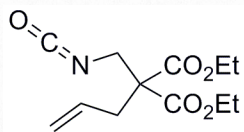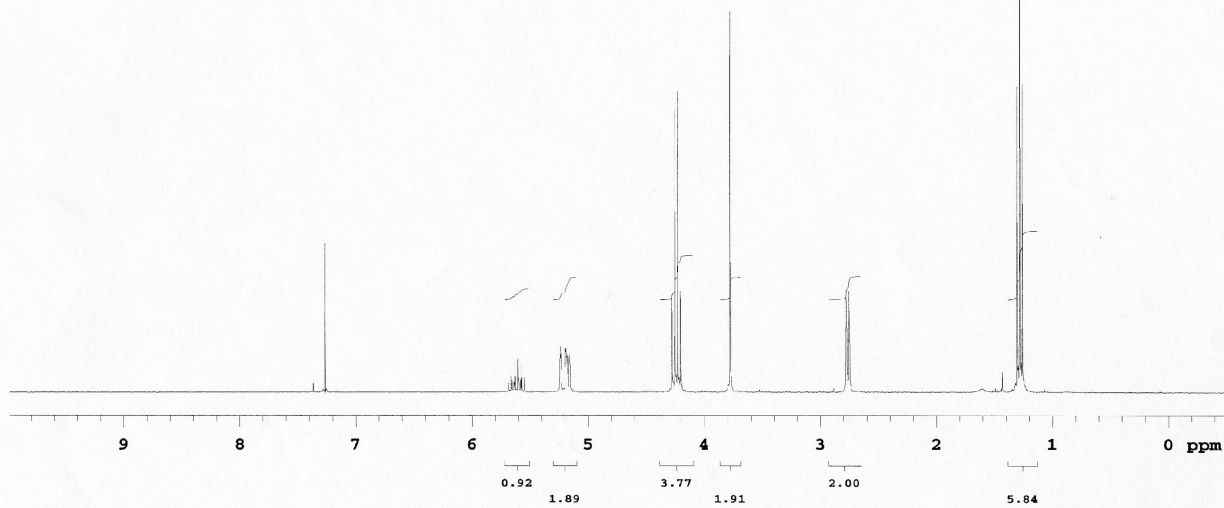

mp-109-10-7-05-carbon

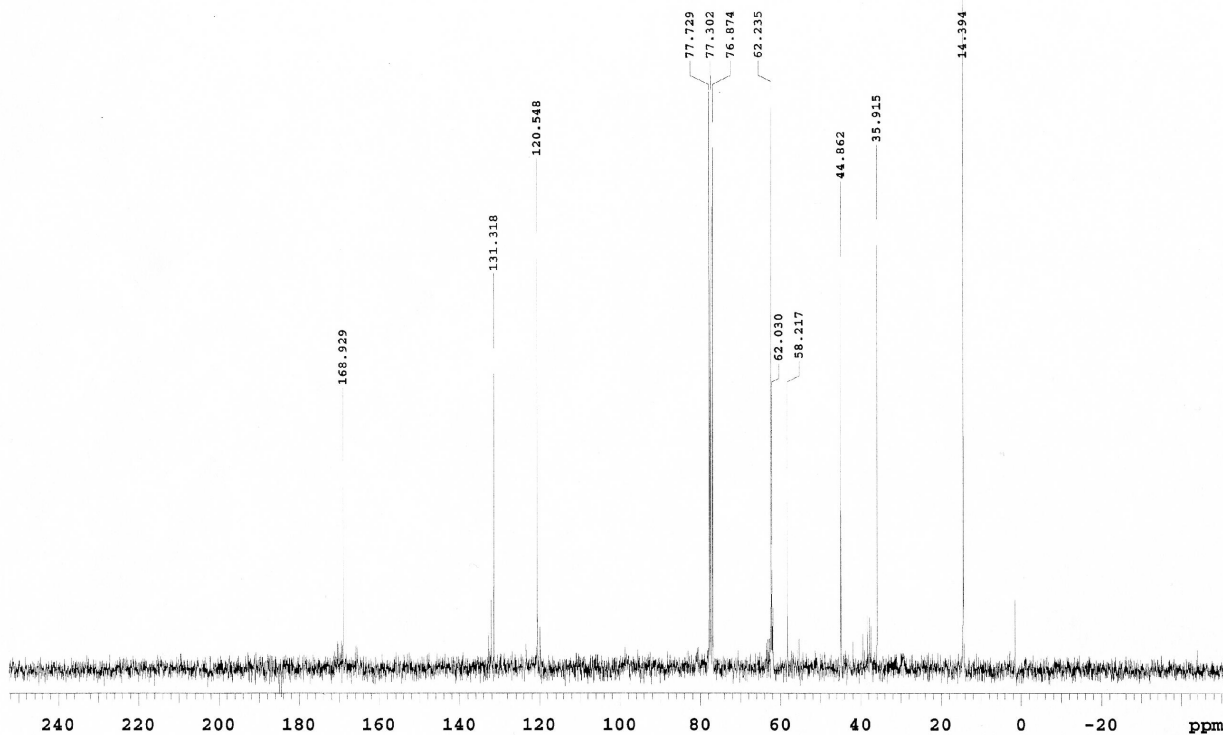

mp-isocy-gemdimethyl

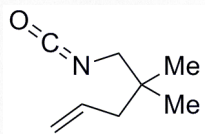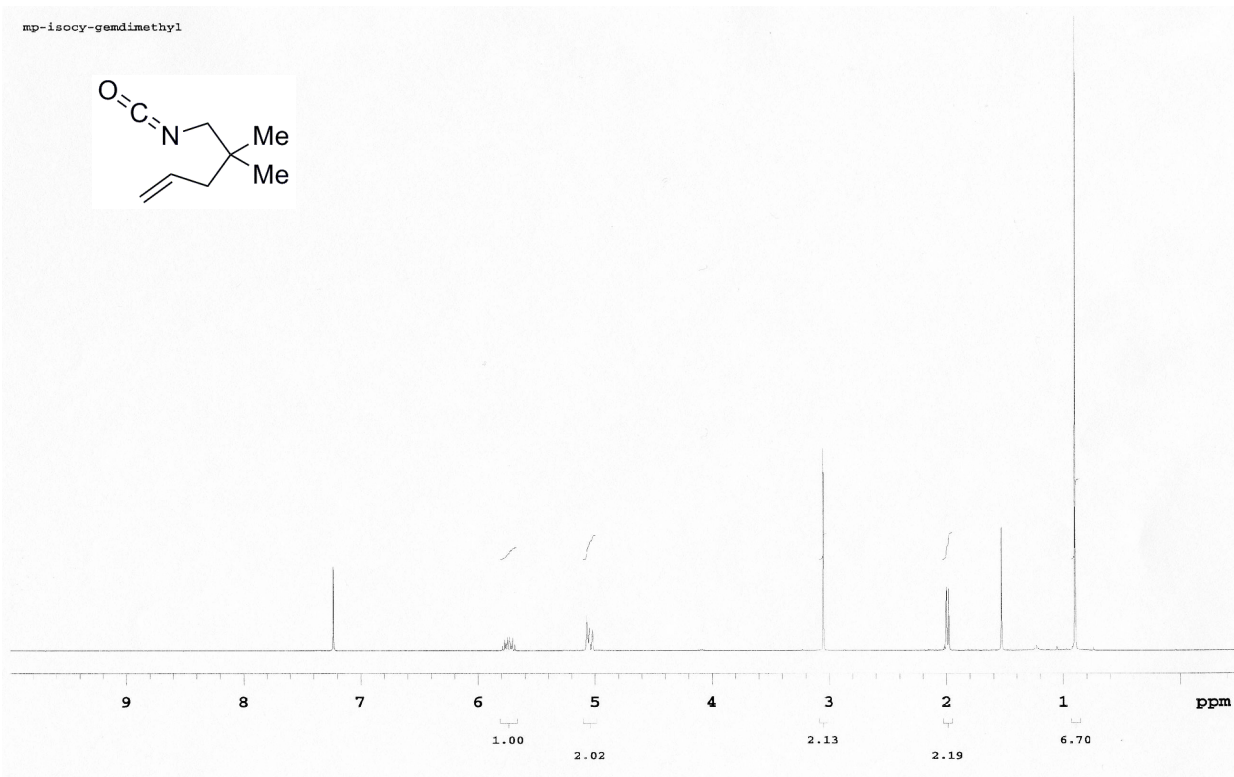

mp-isocy-gemdimethyl

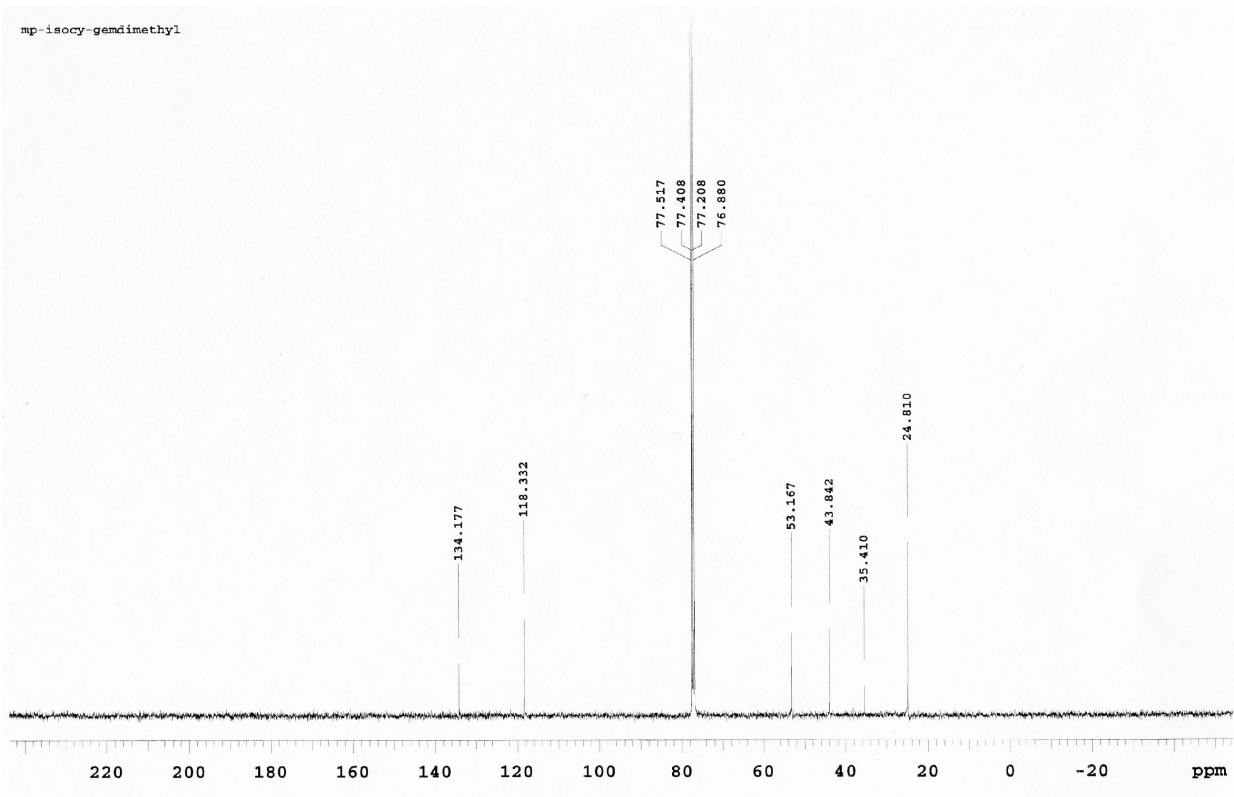

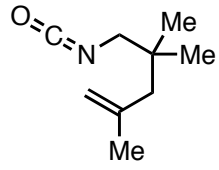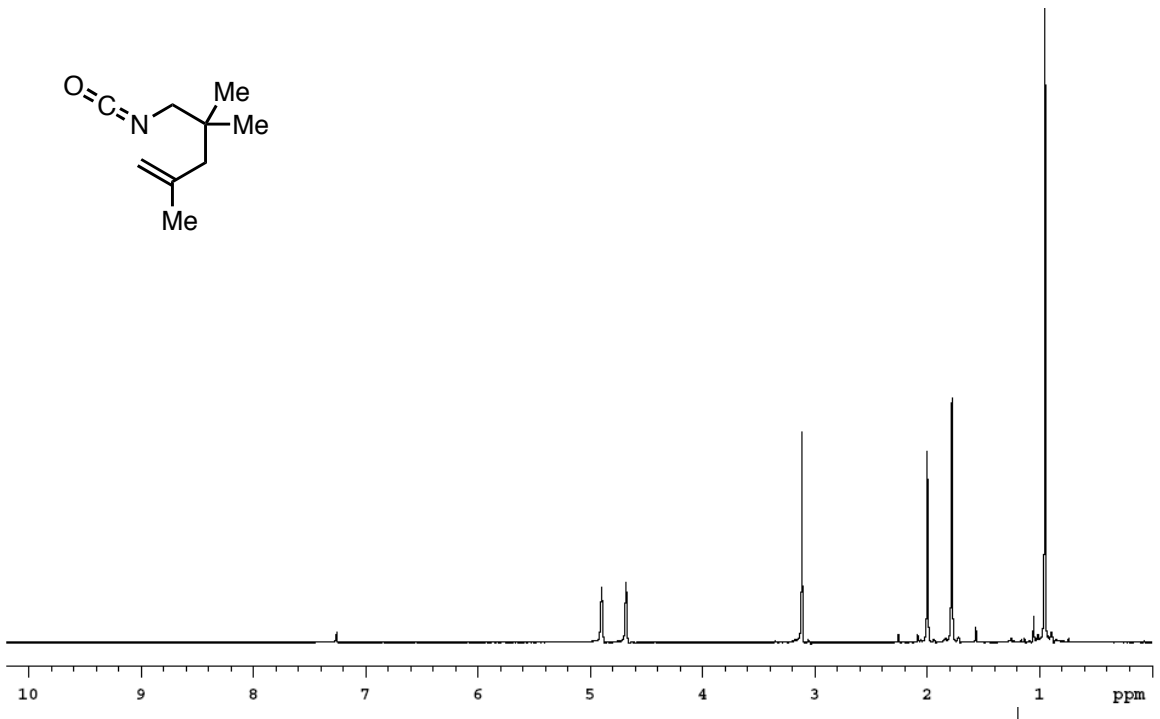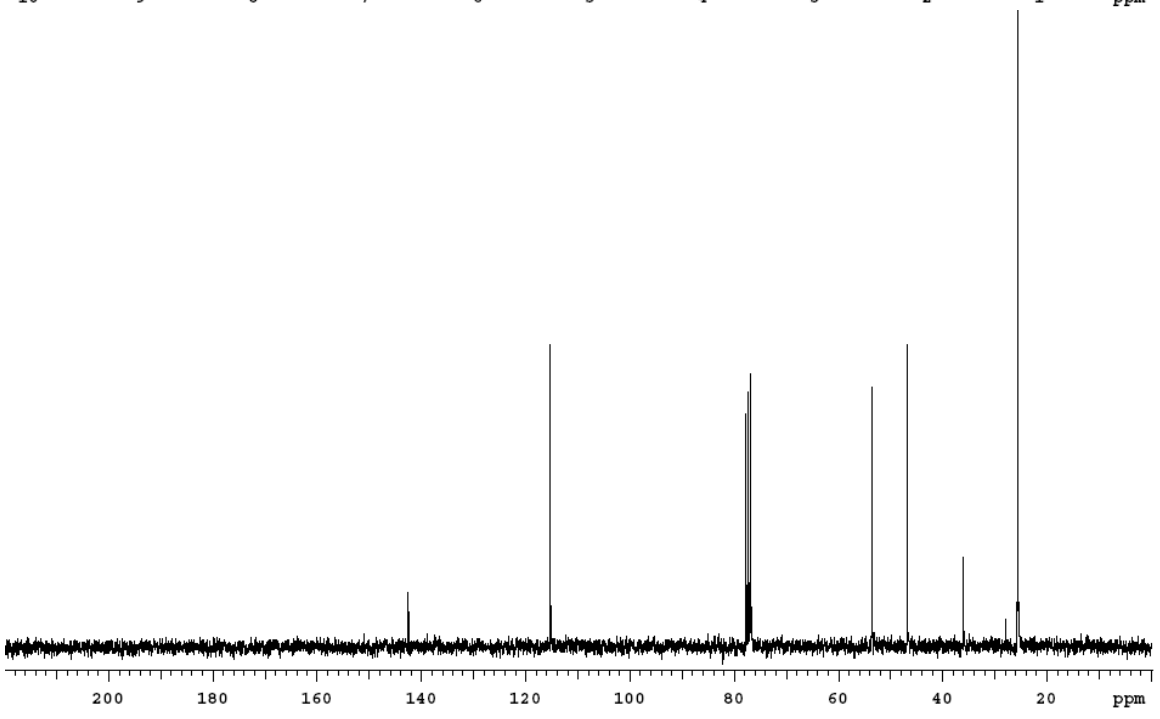

4-28-06-isocy-o-tethered

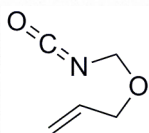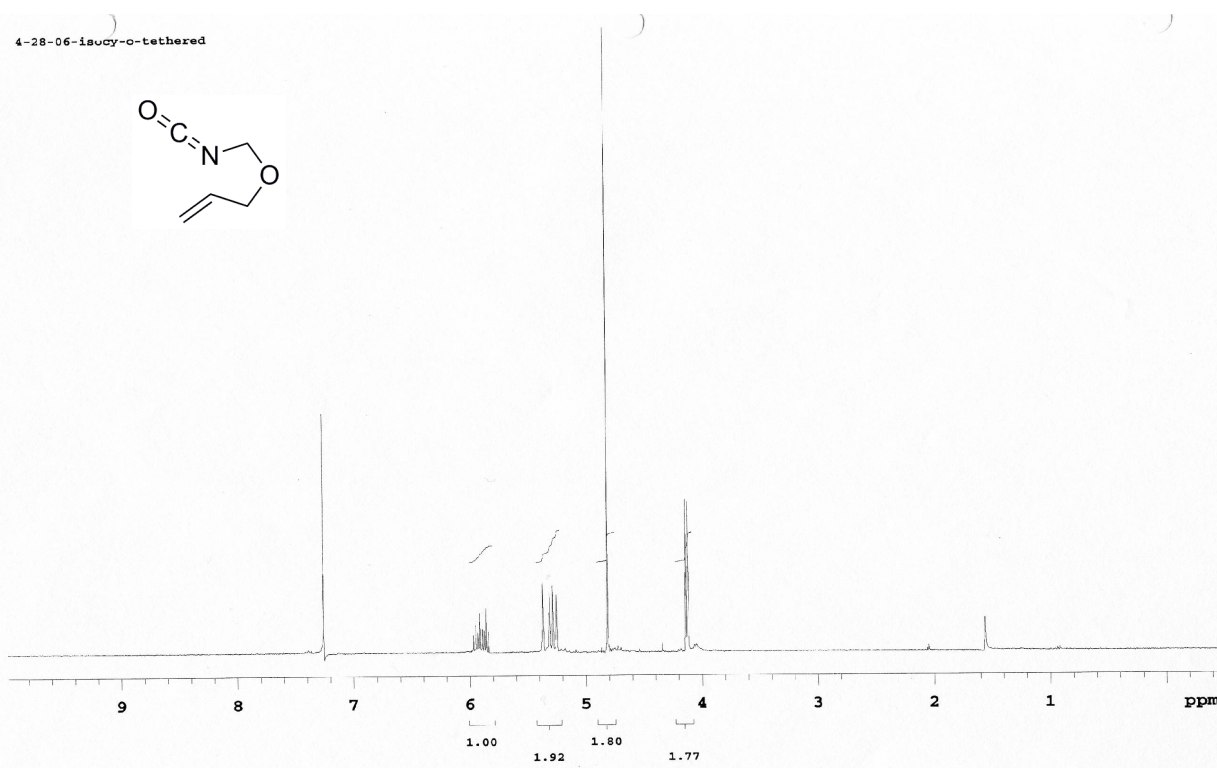

mp-isocy-oxyteth-6-5

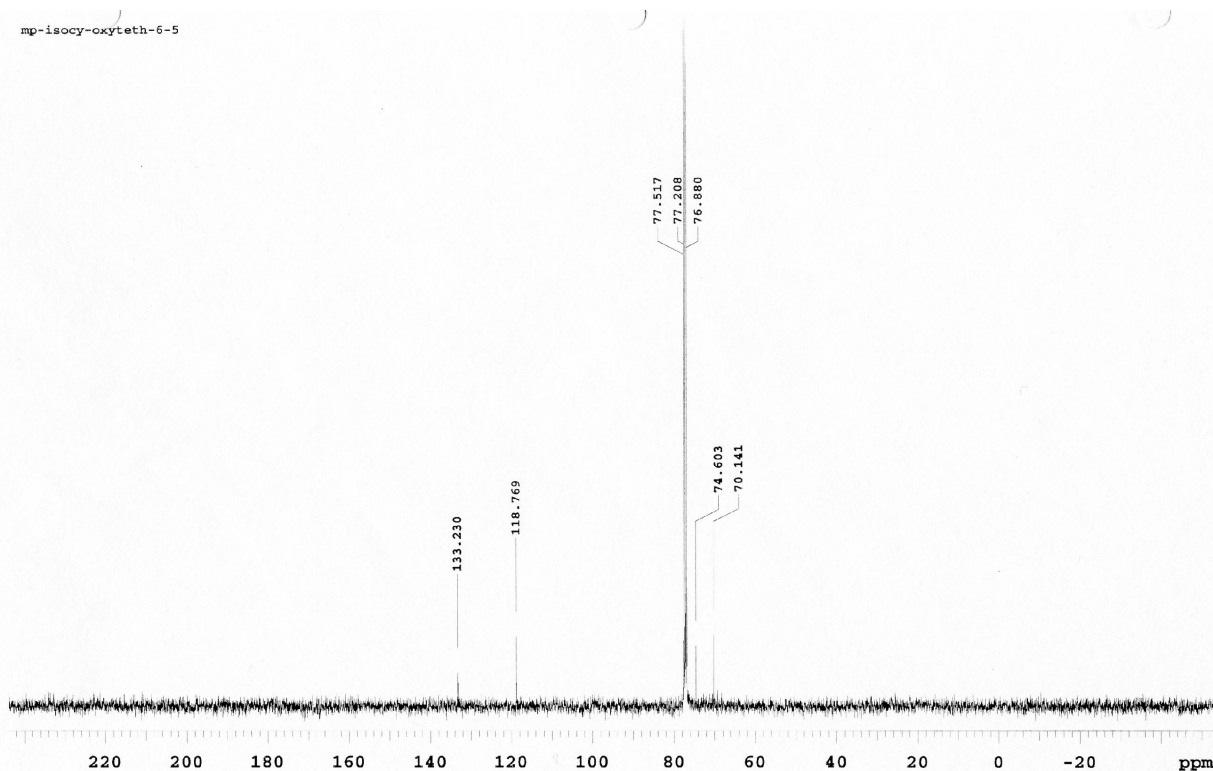



mp-oxyteth-6-6

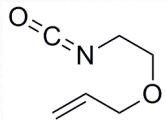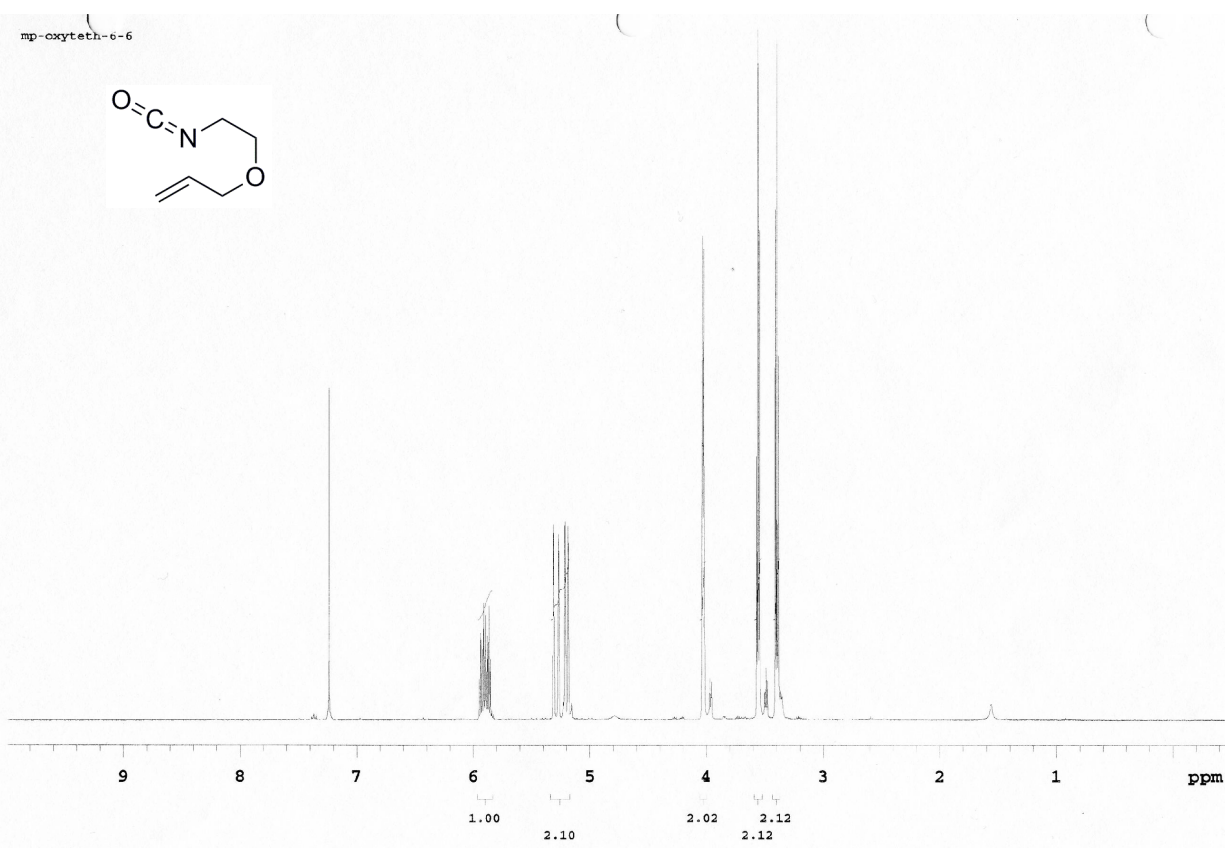

mp-oxyteth-6-6

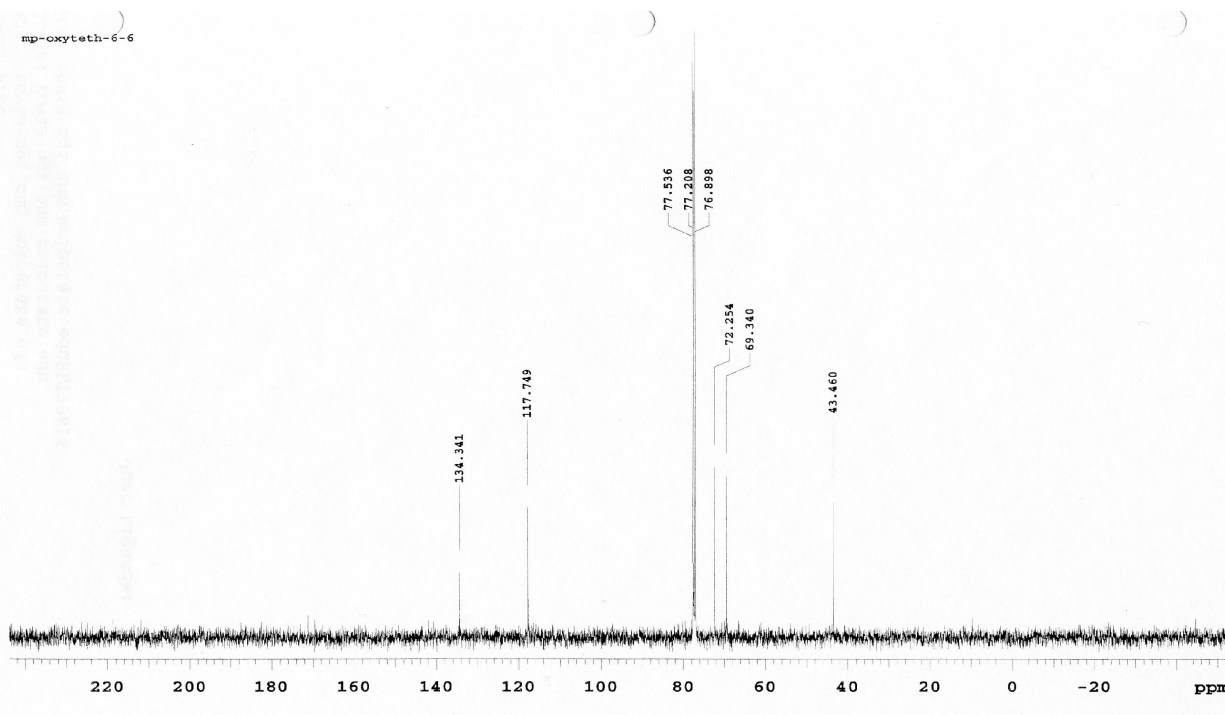



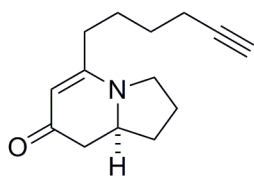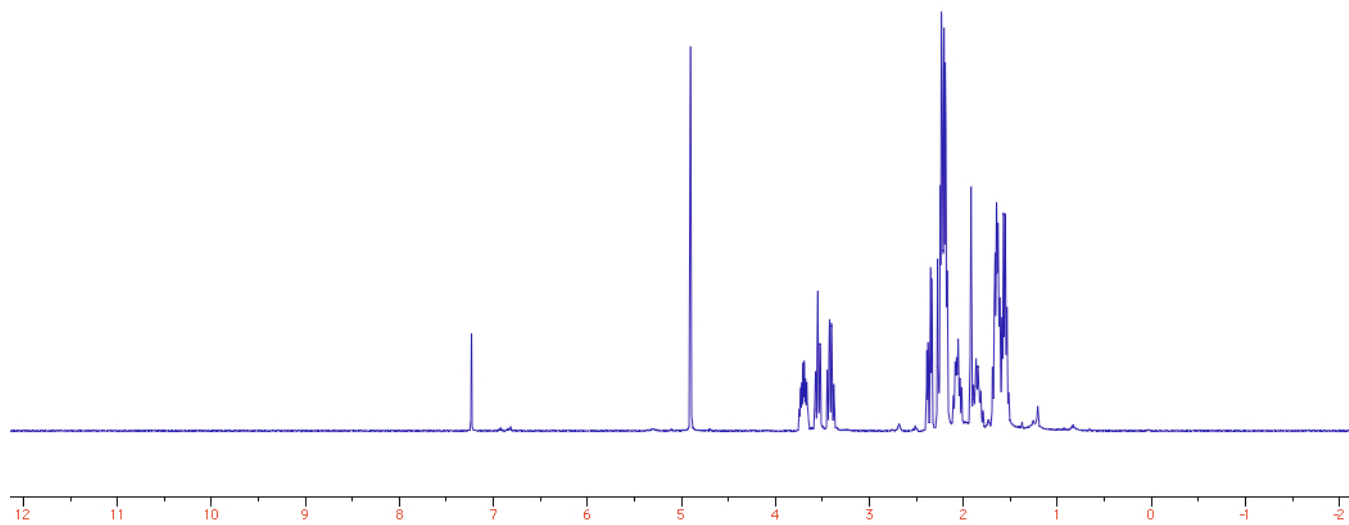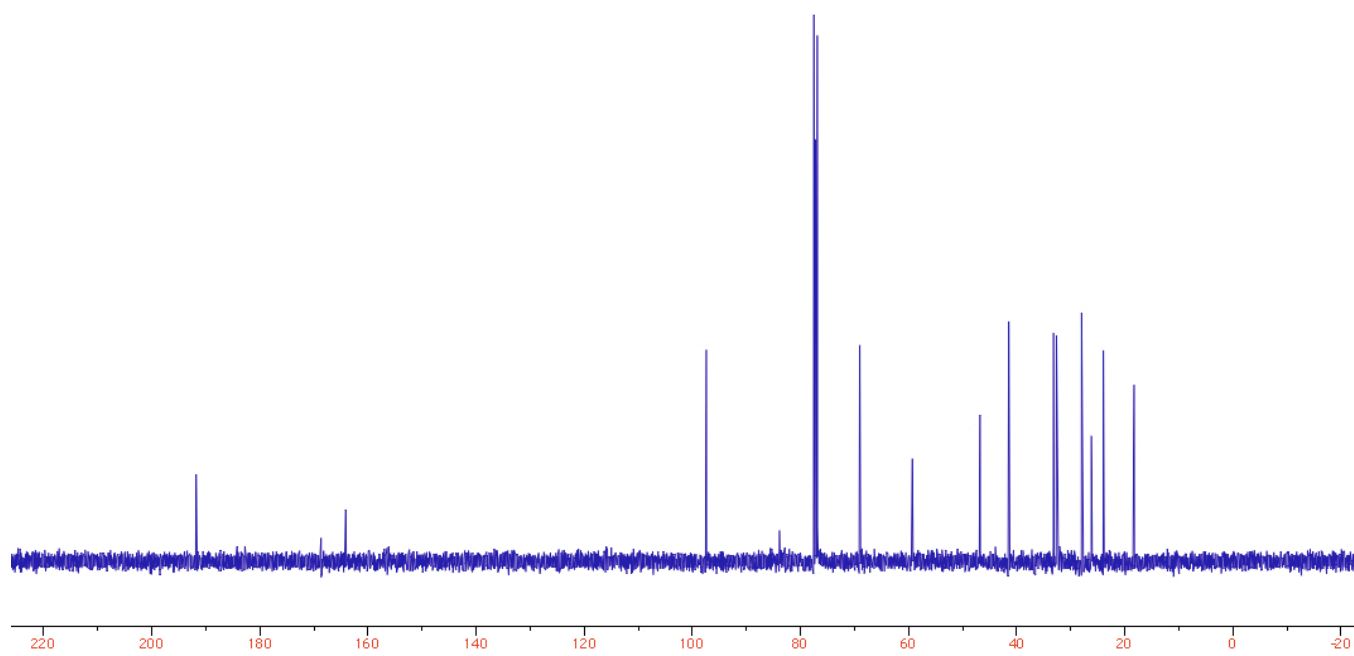

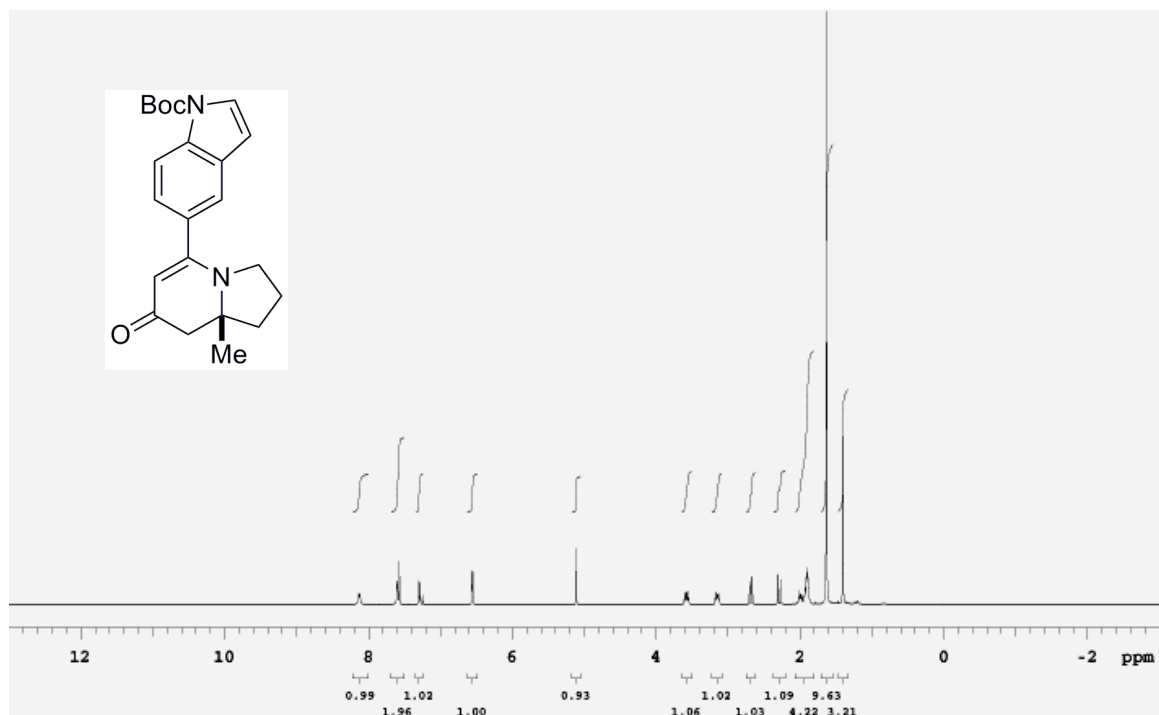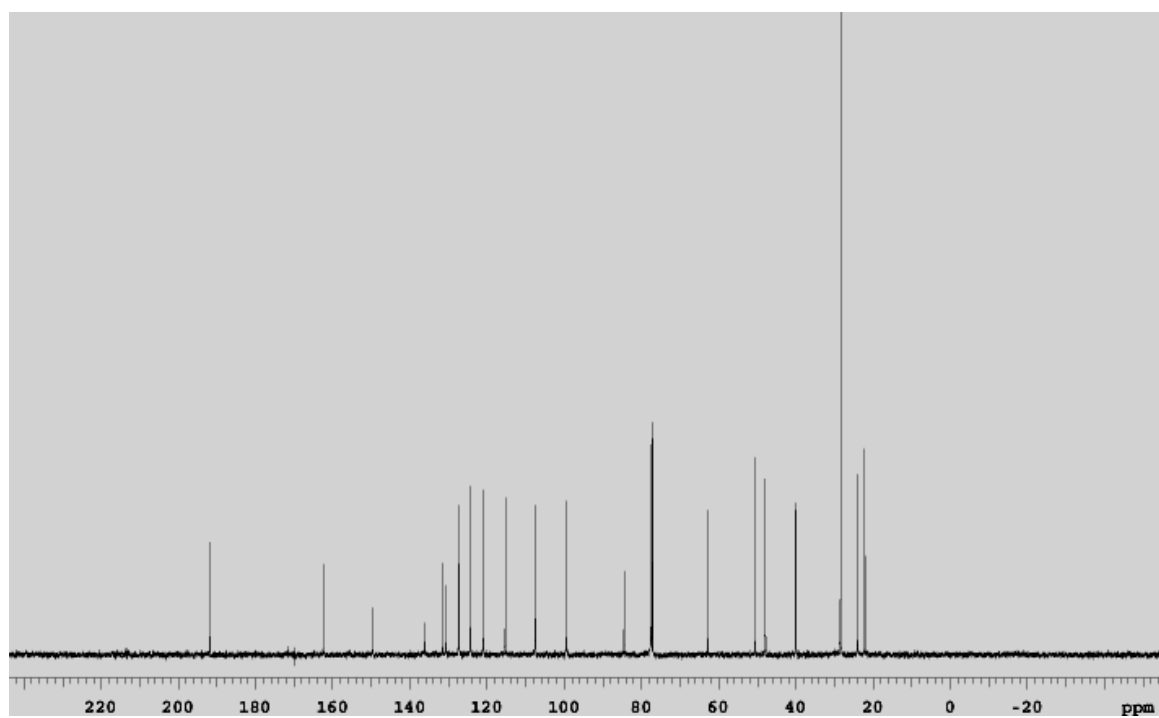

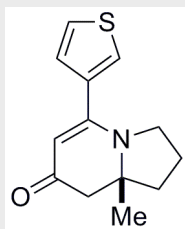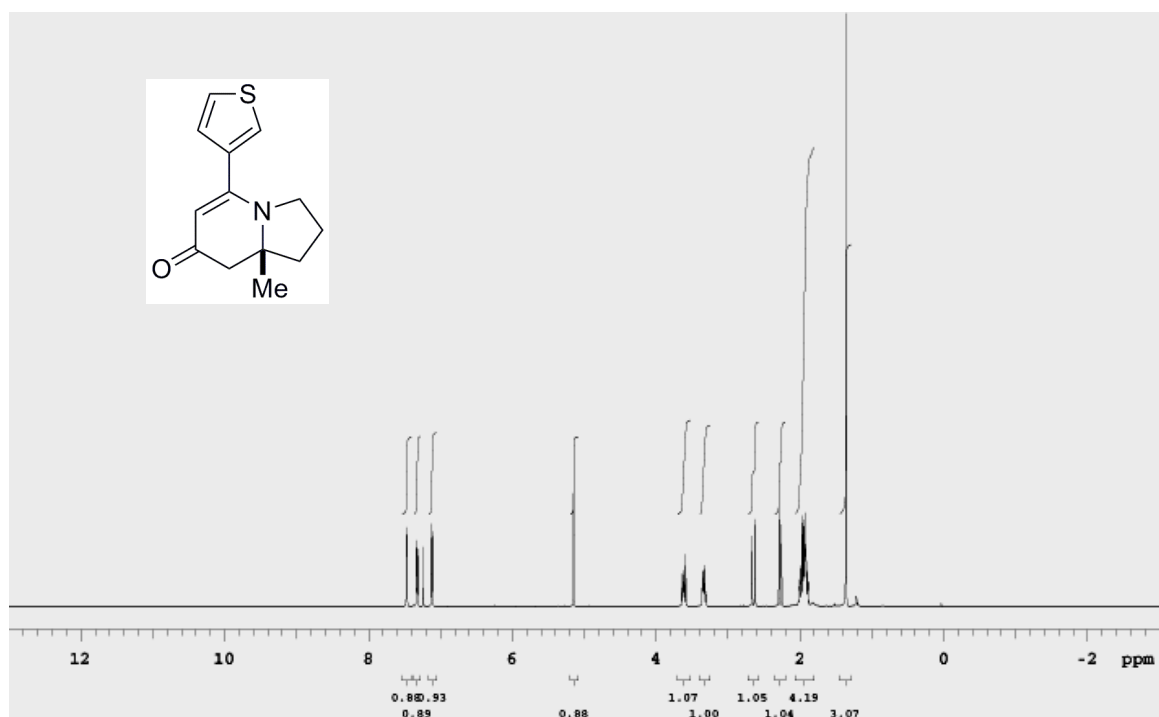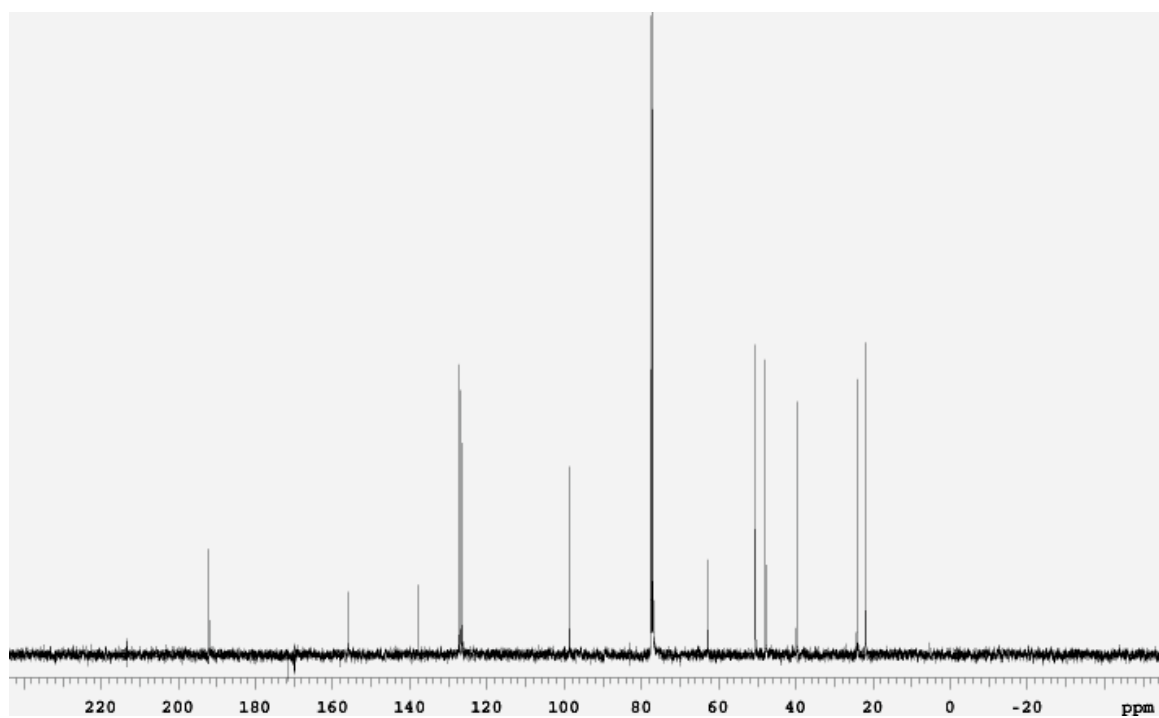

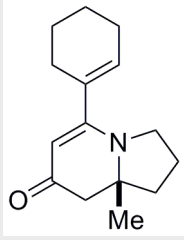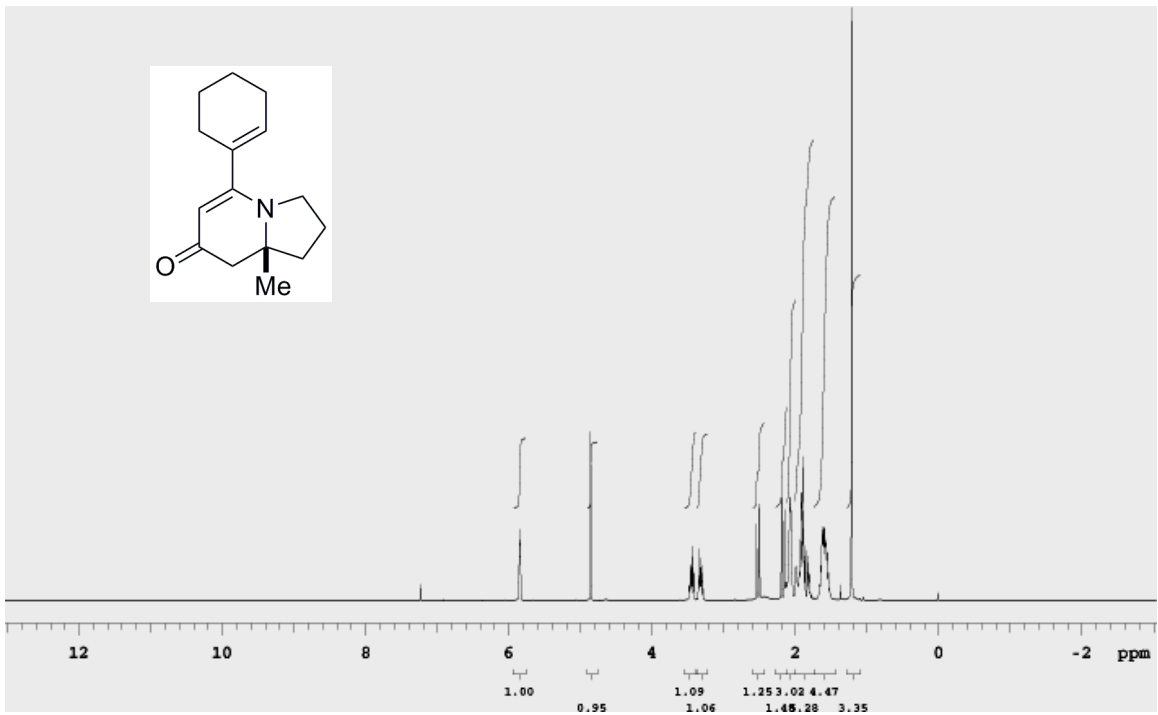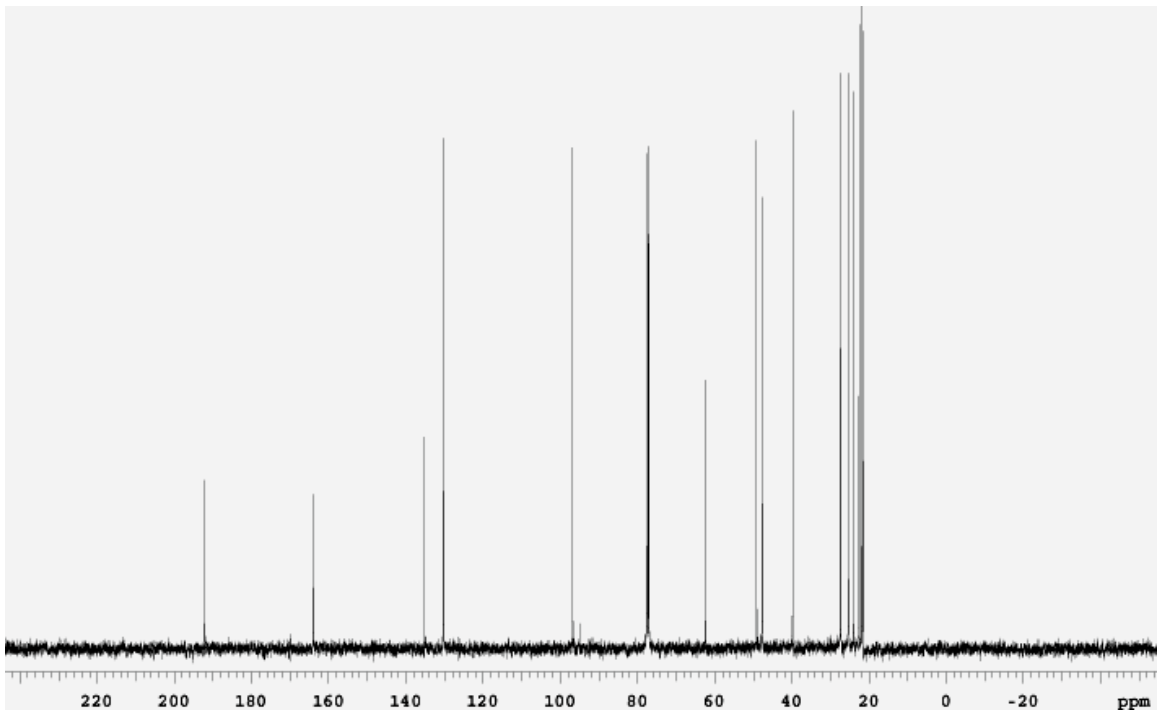

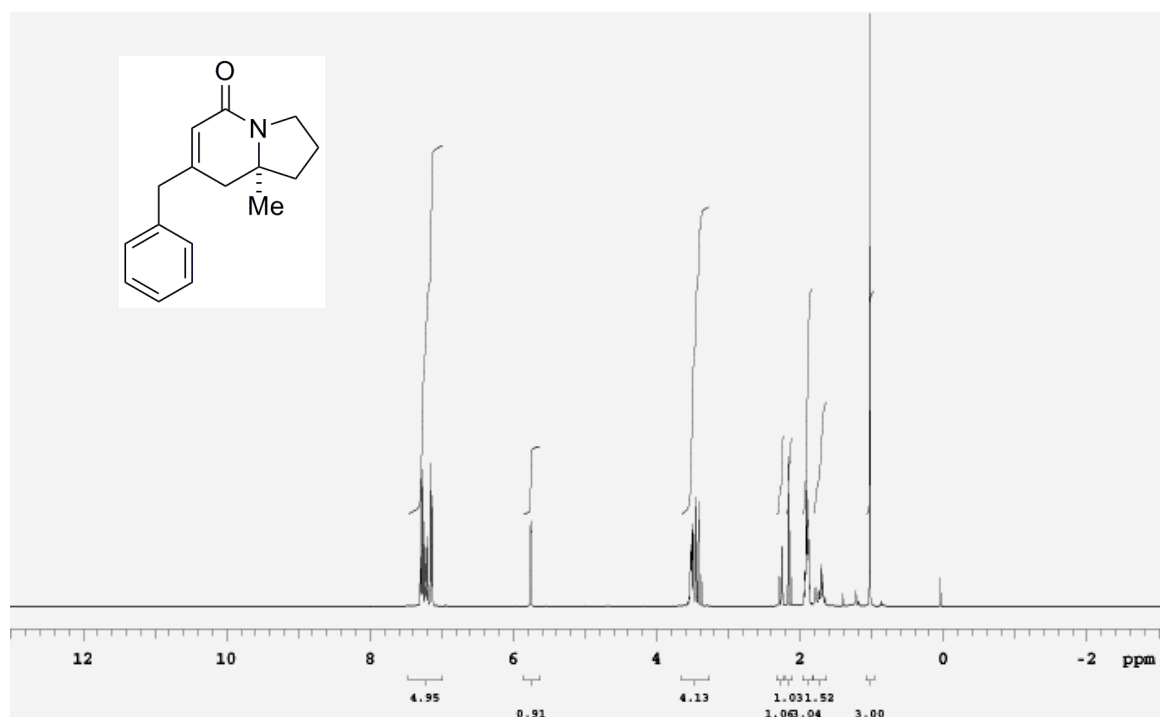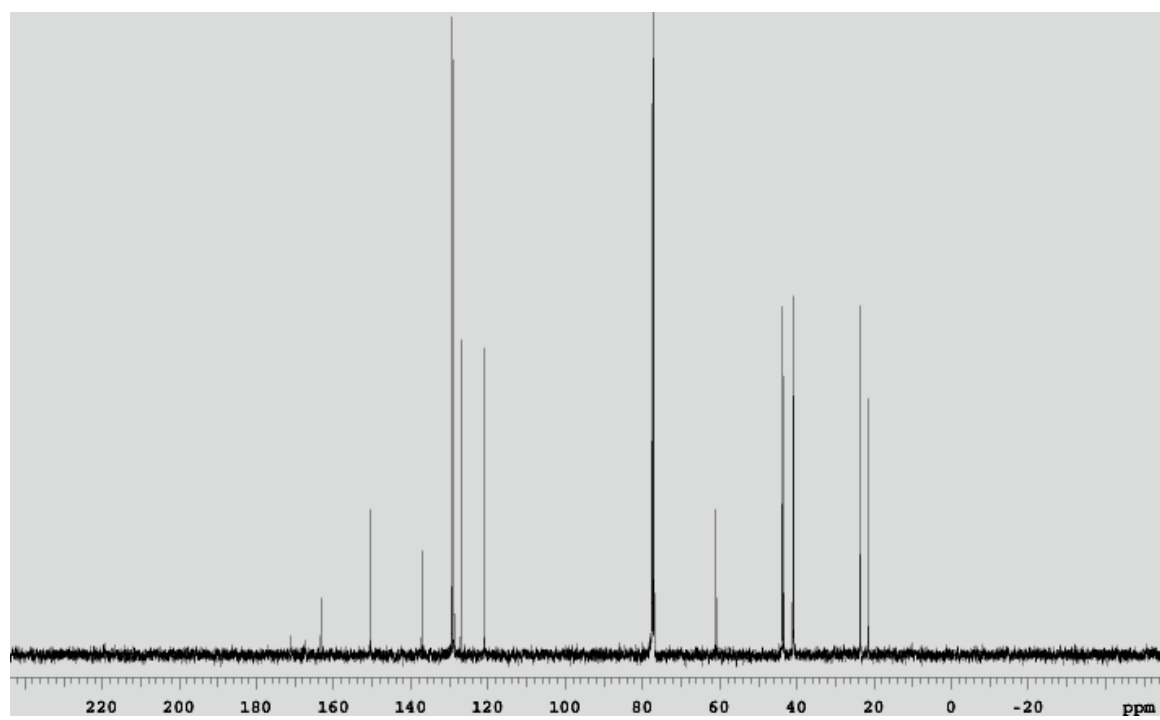

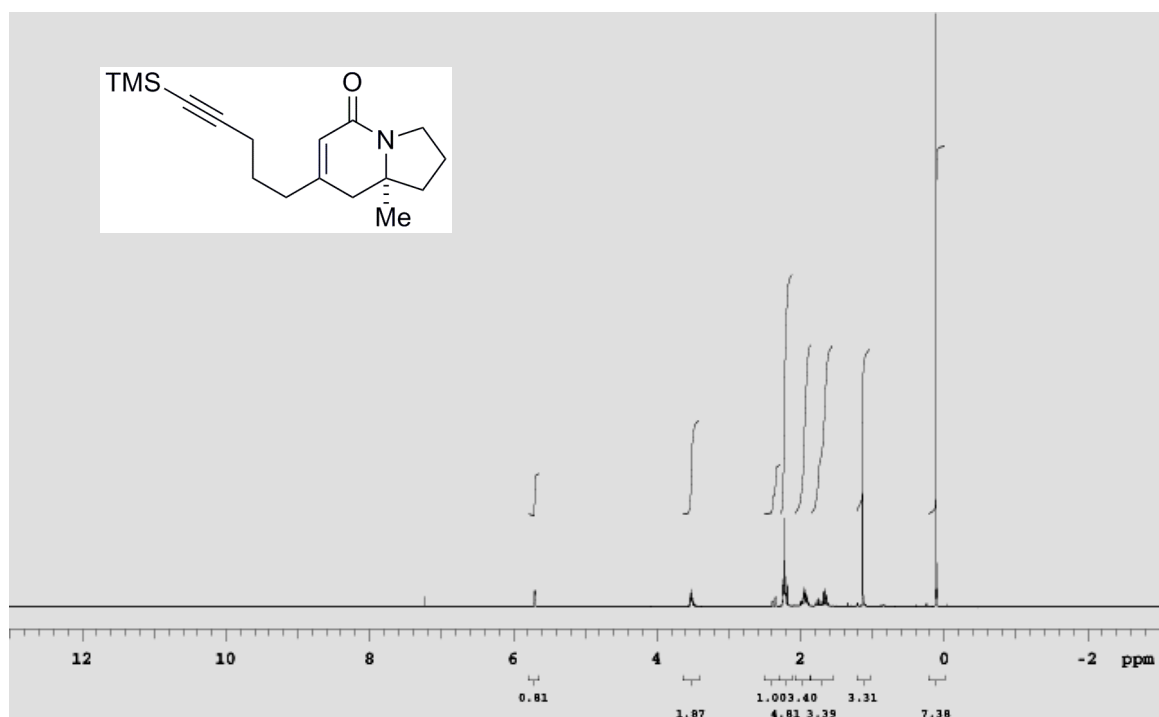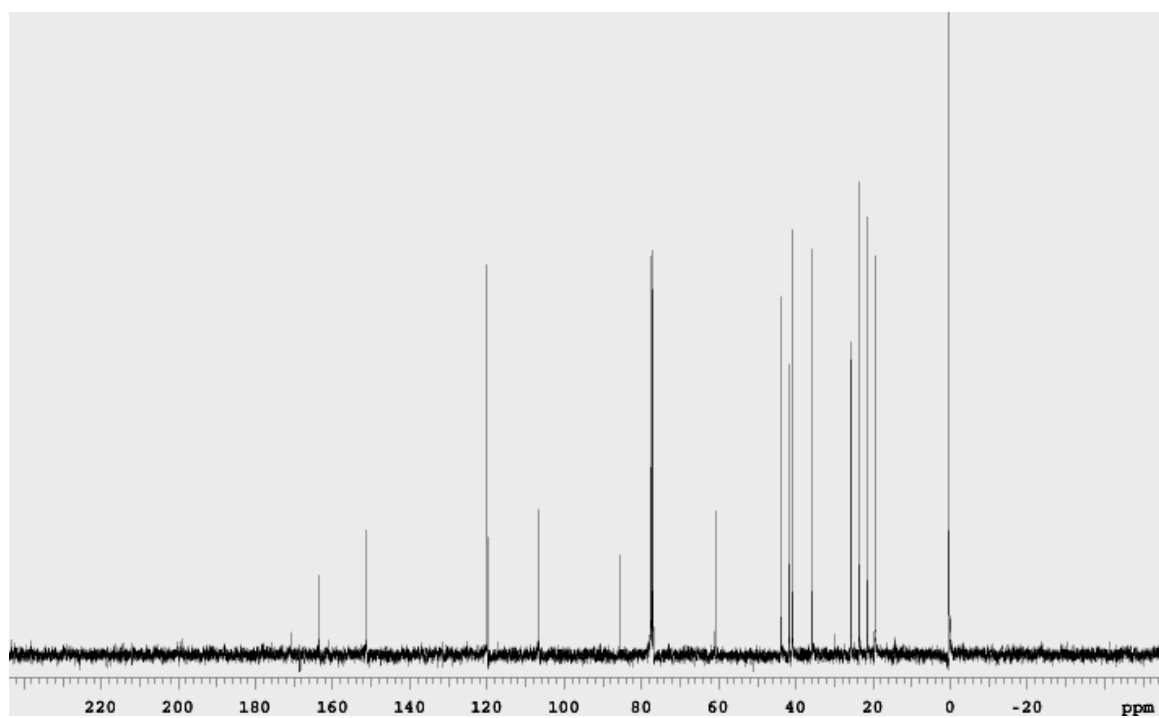

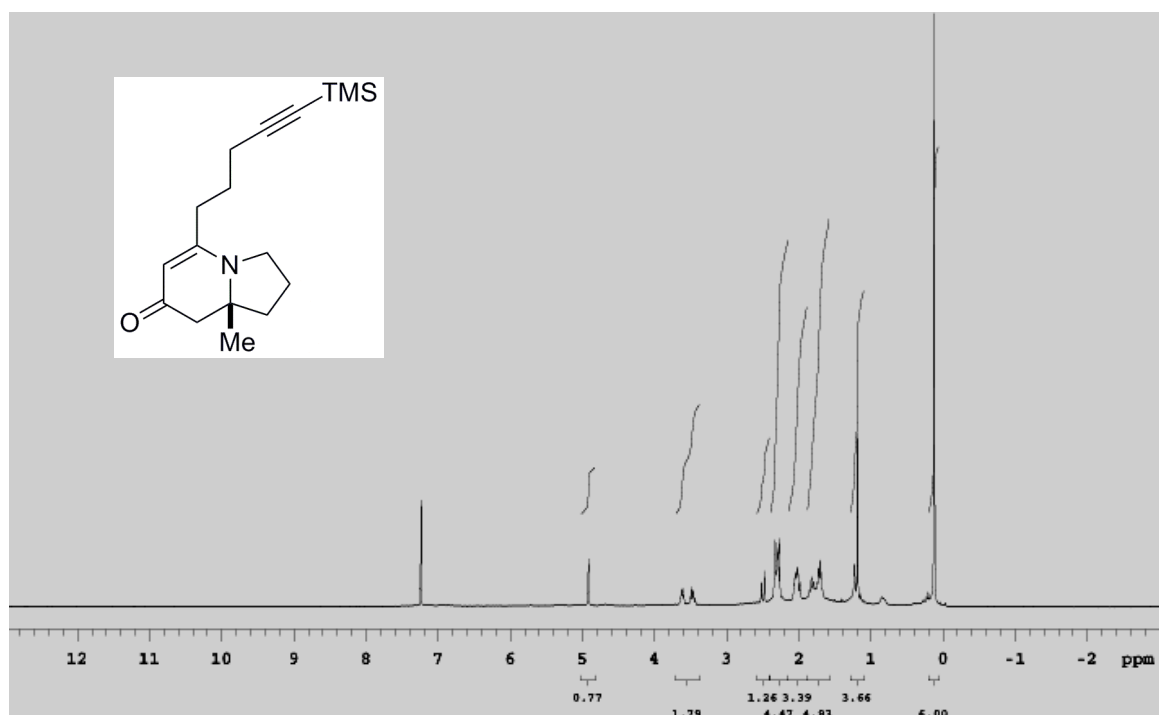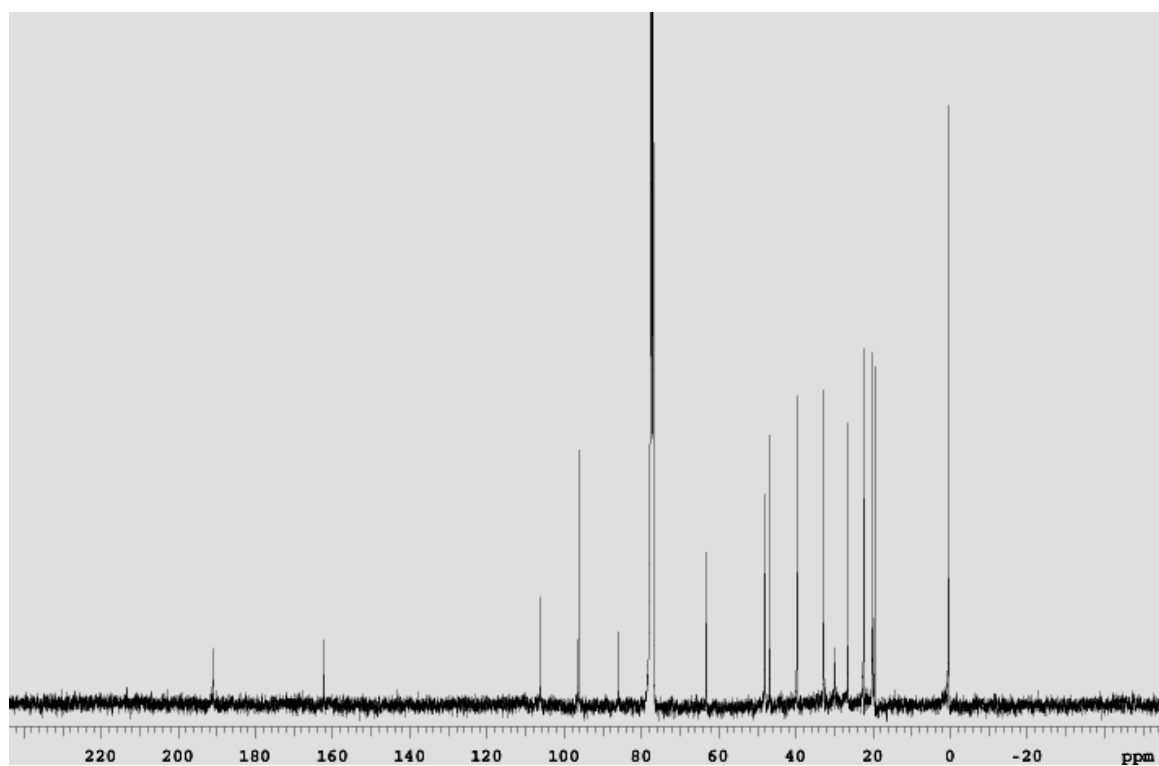

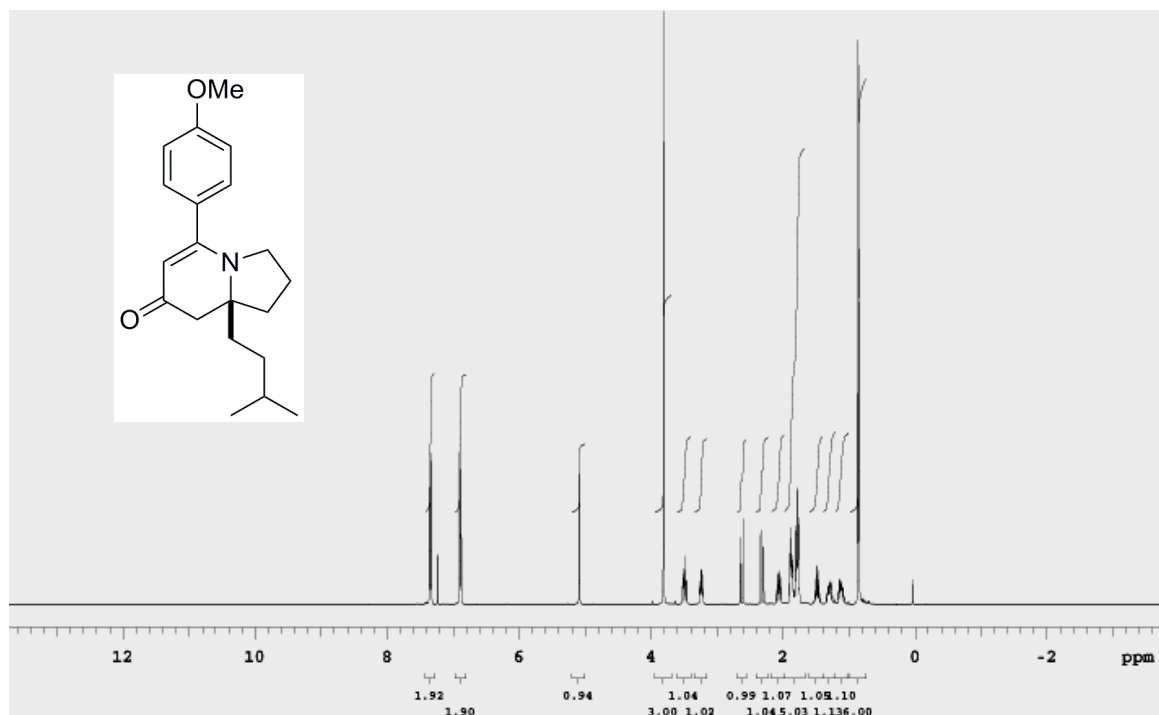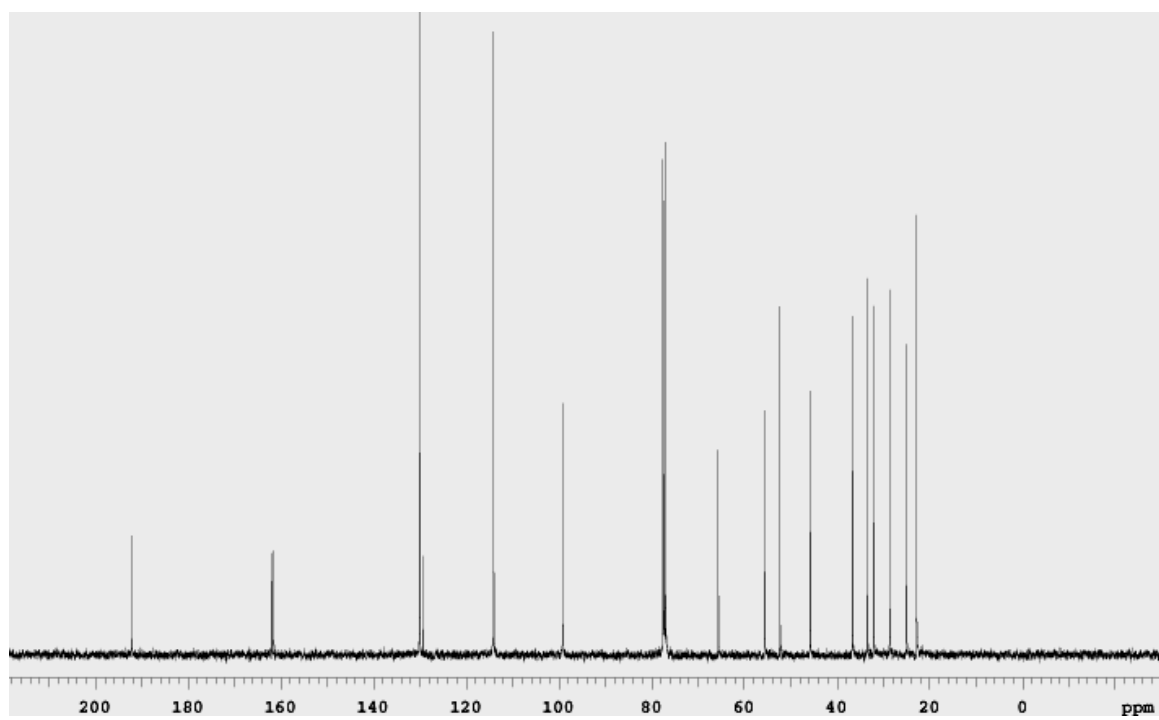



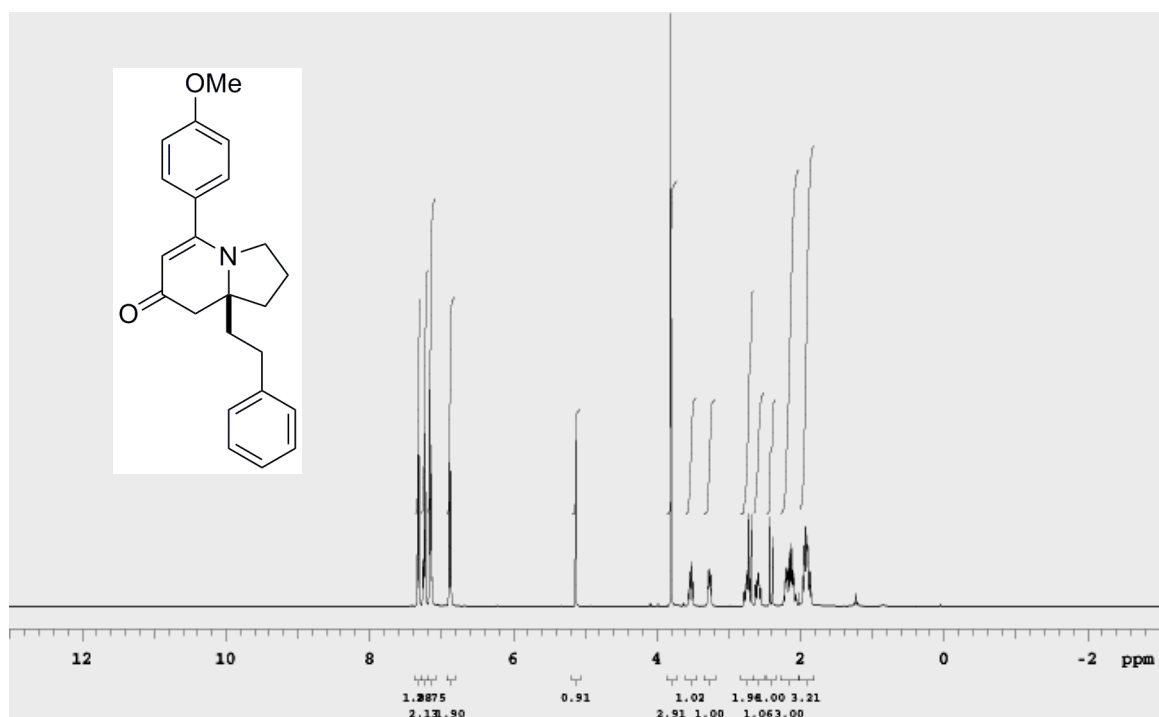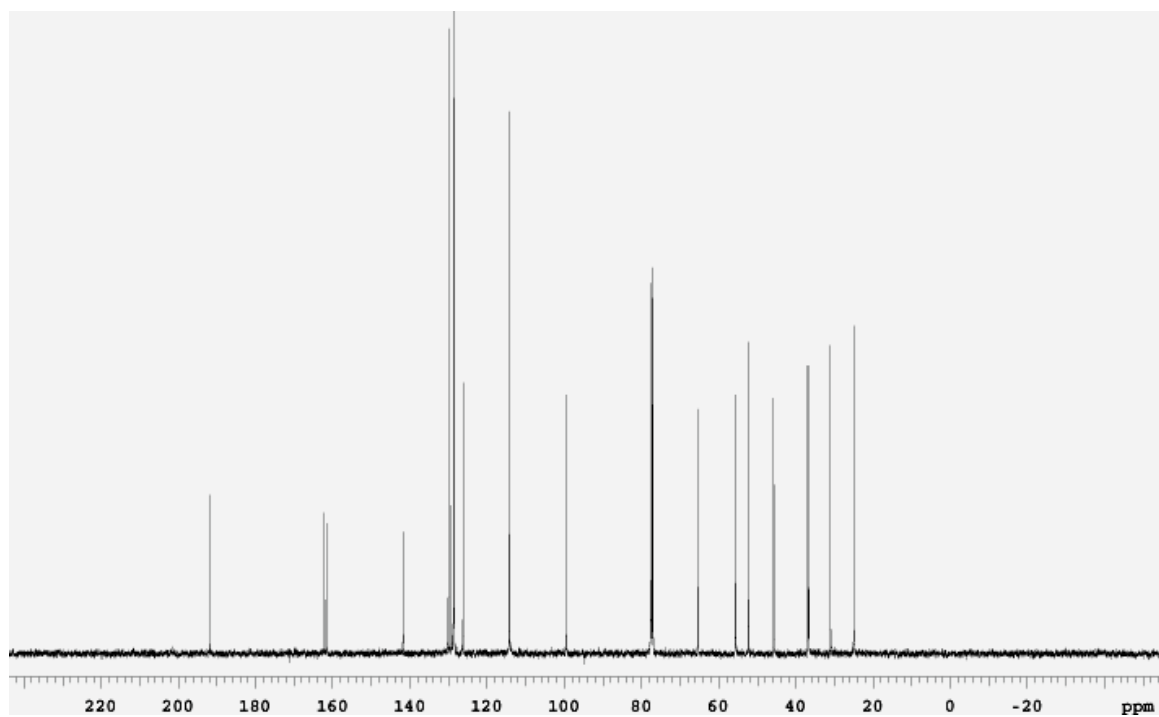

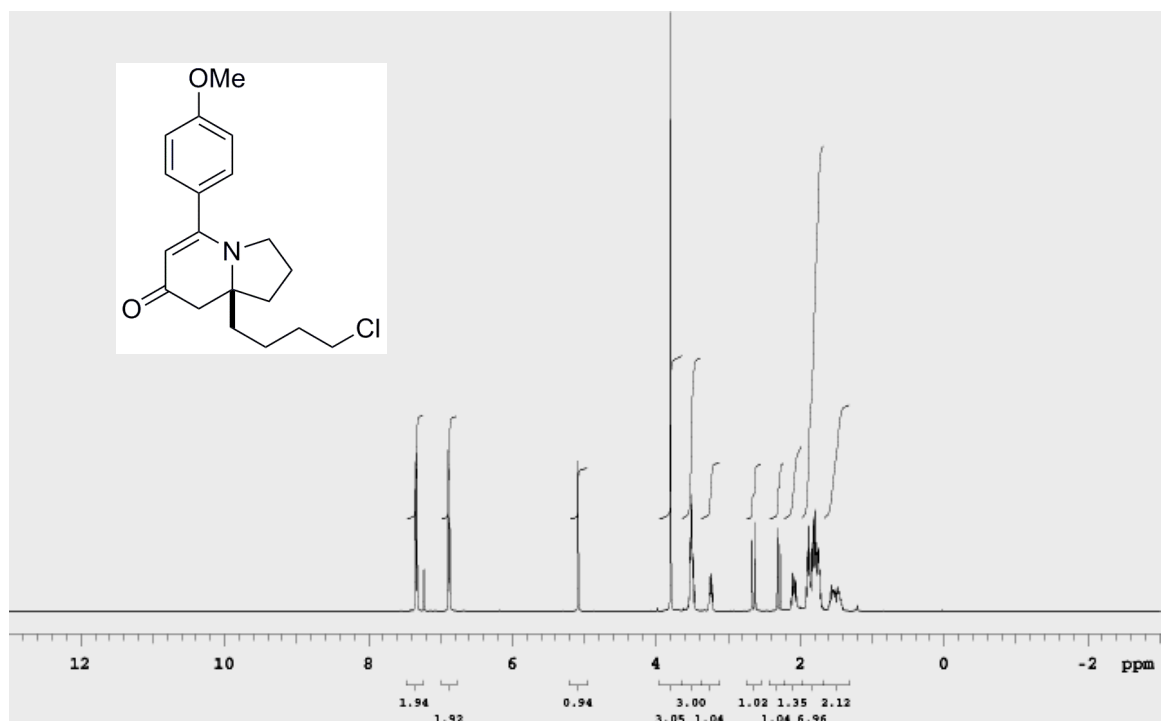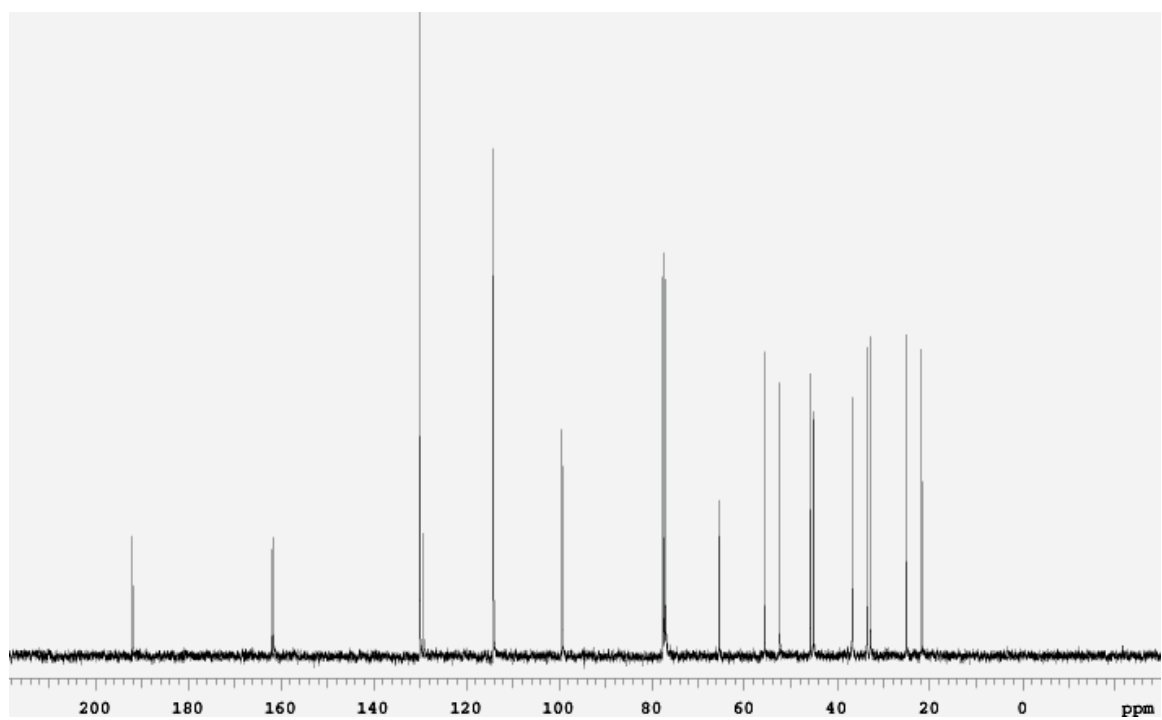

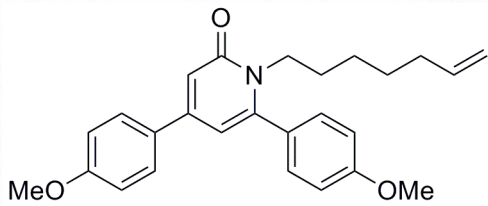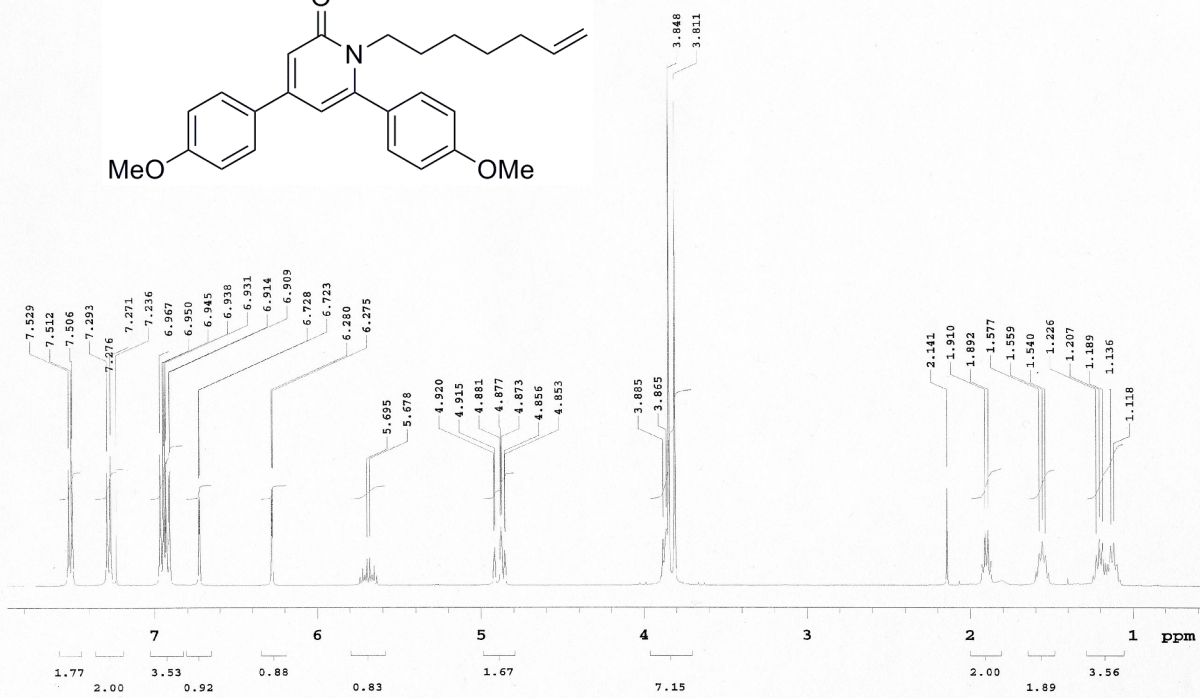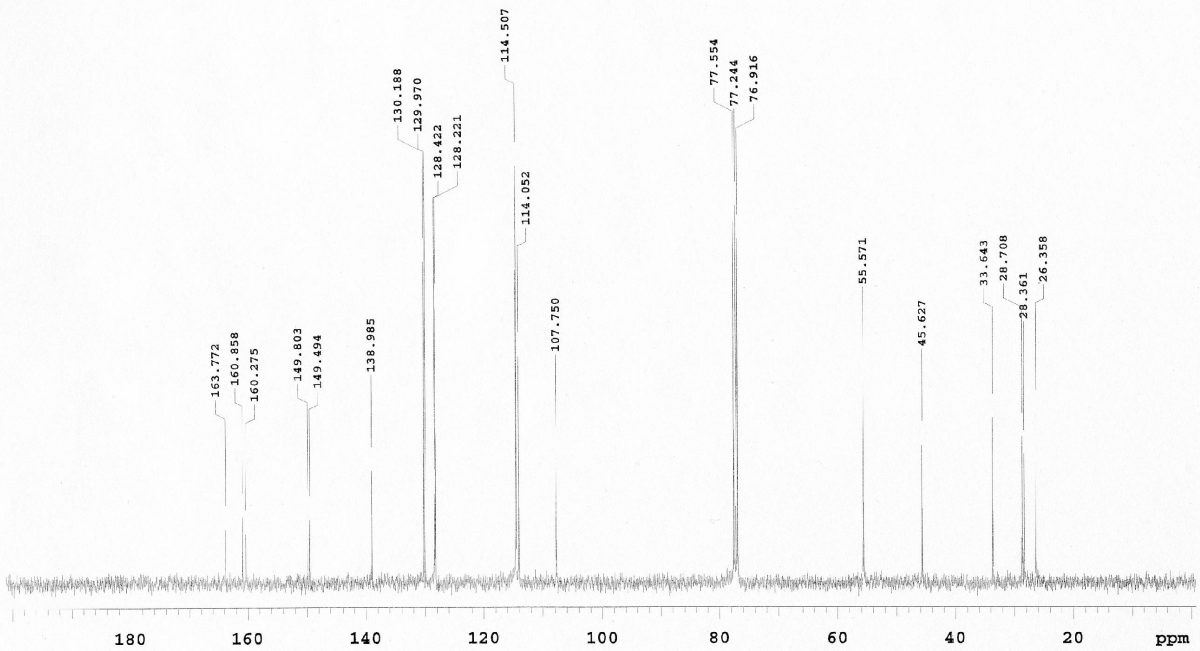

mp-2-51-1

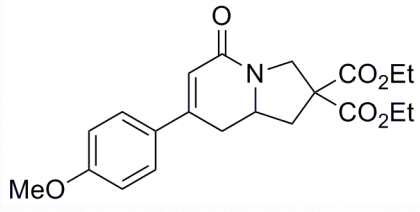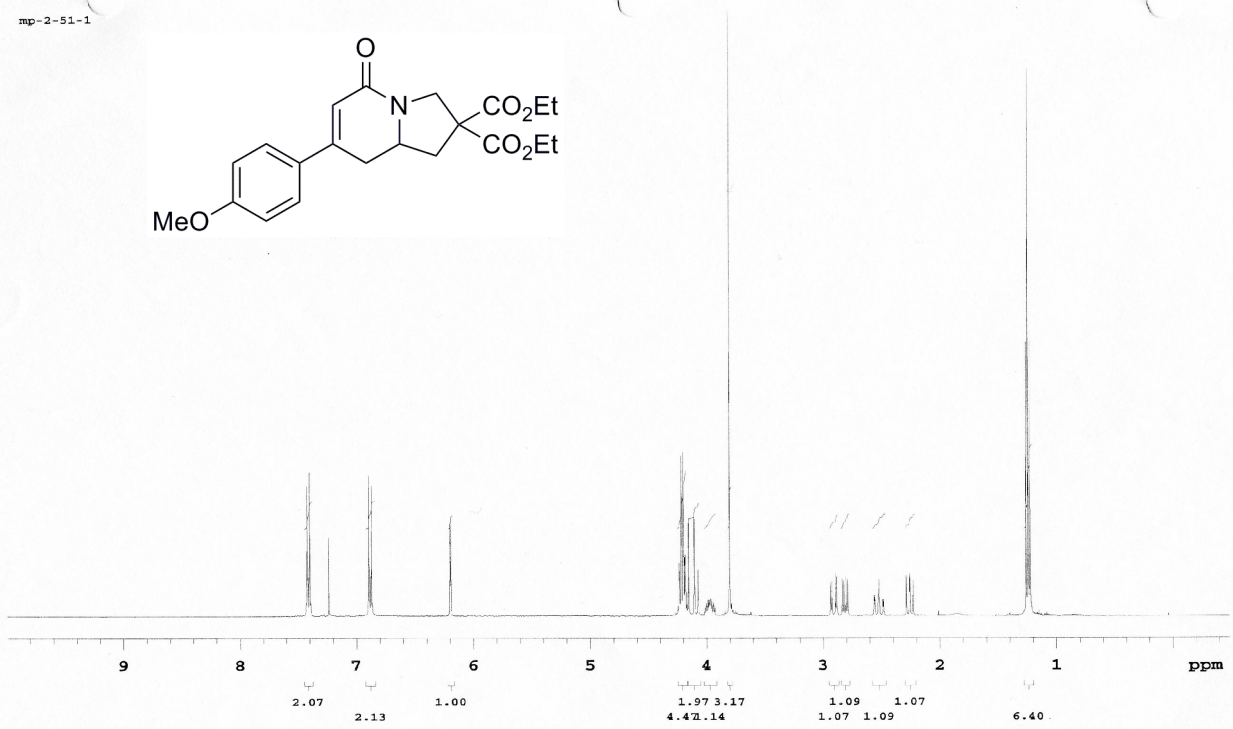

mp-2-51-lac

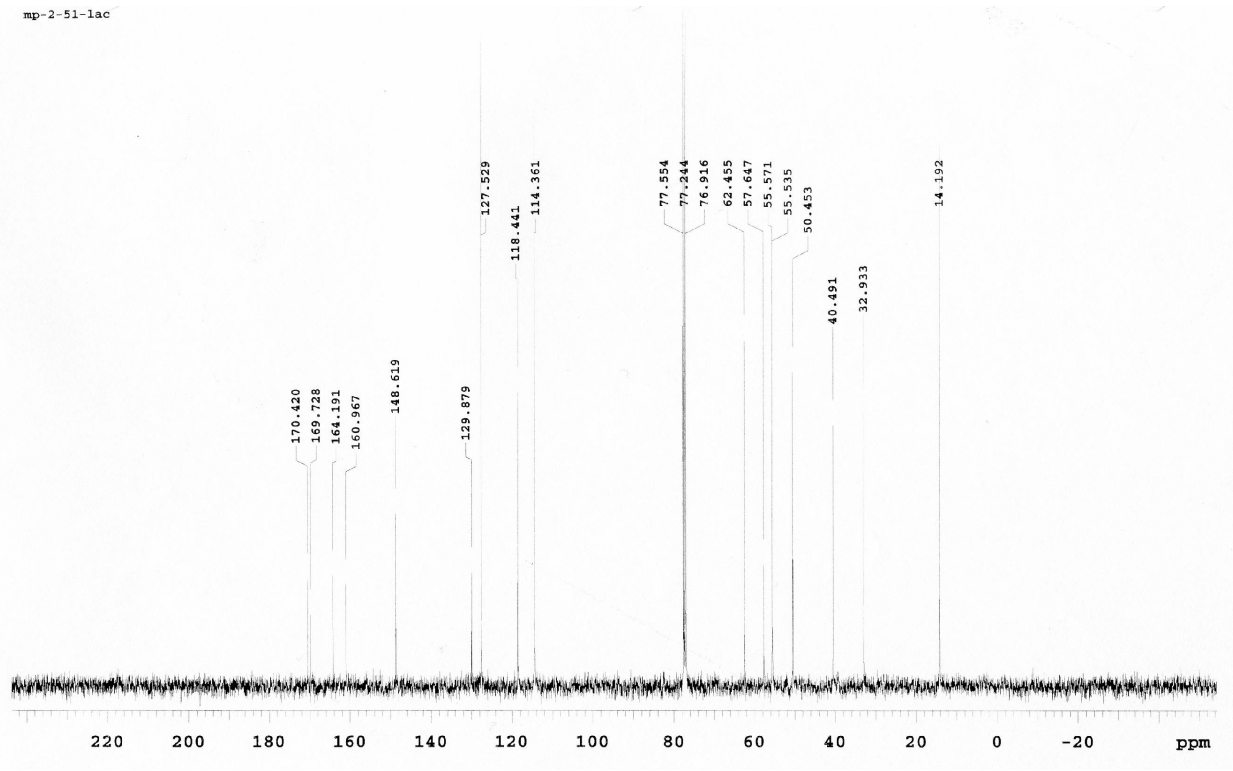

mp-2-51

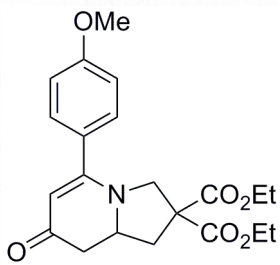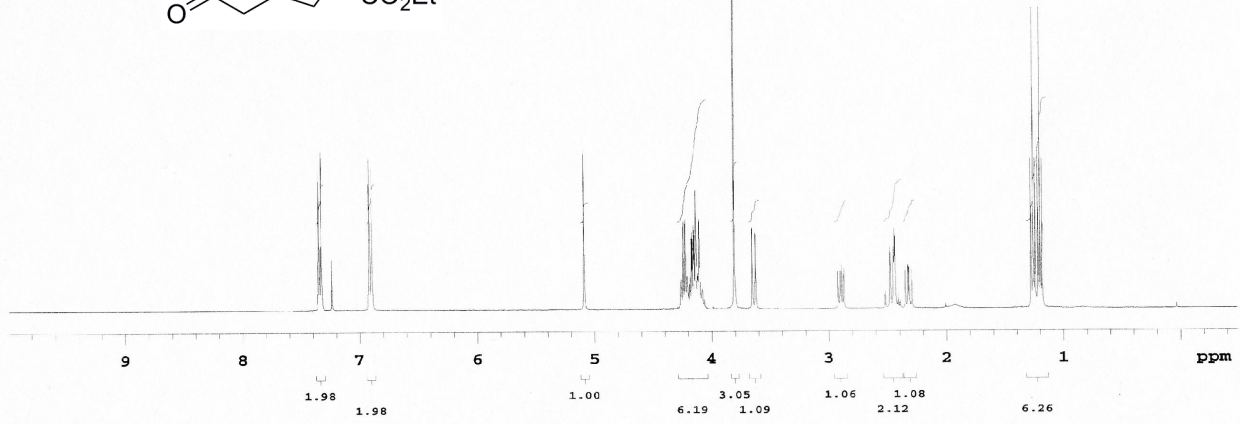

mp-2-51-va

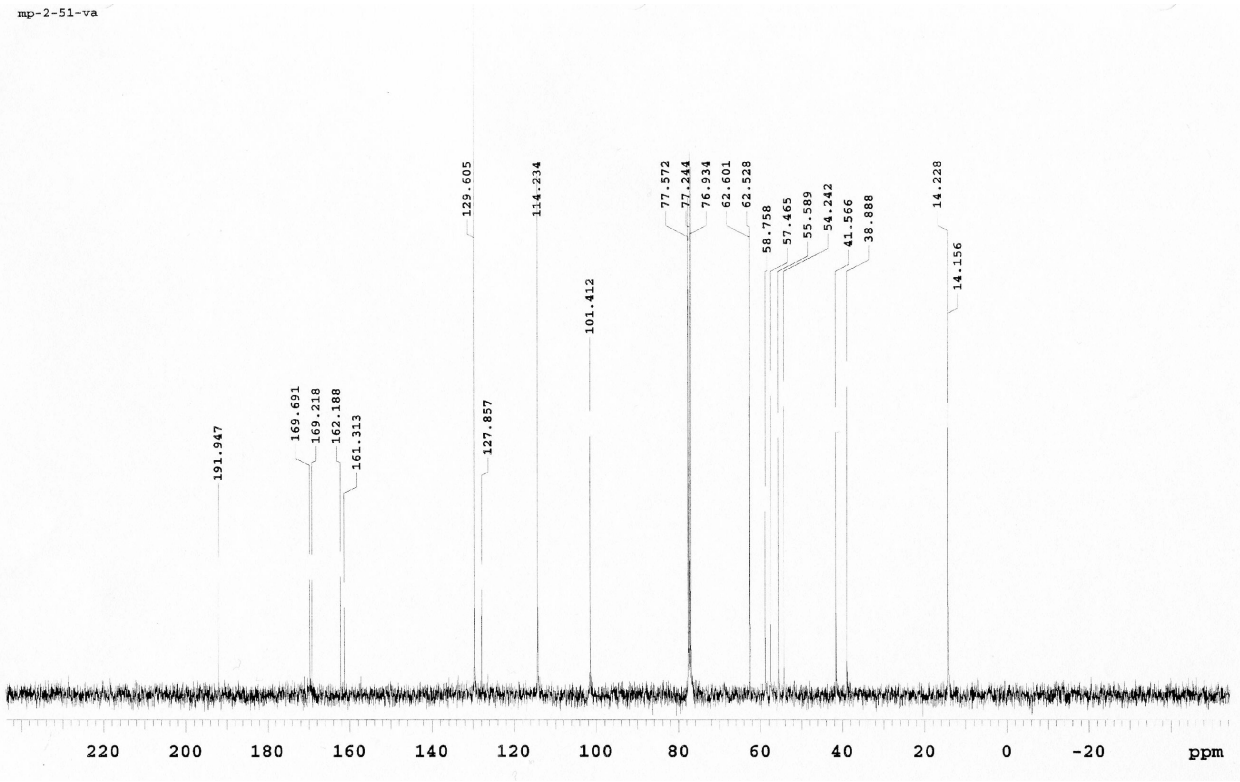



mp-2-74-va

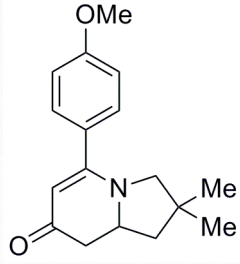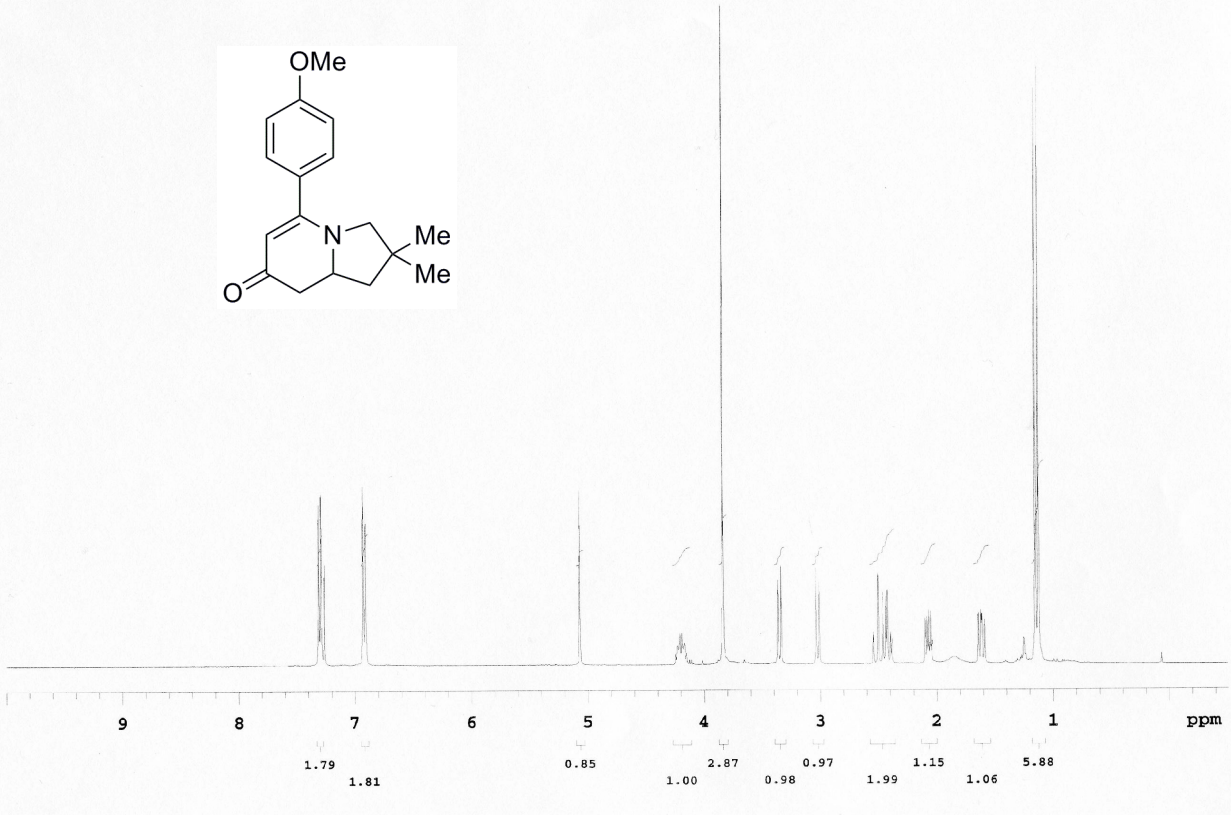

mp-2-74-va

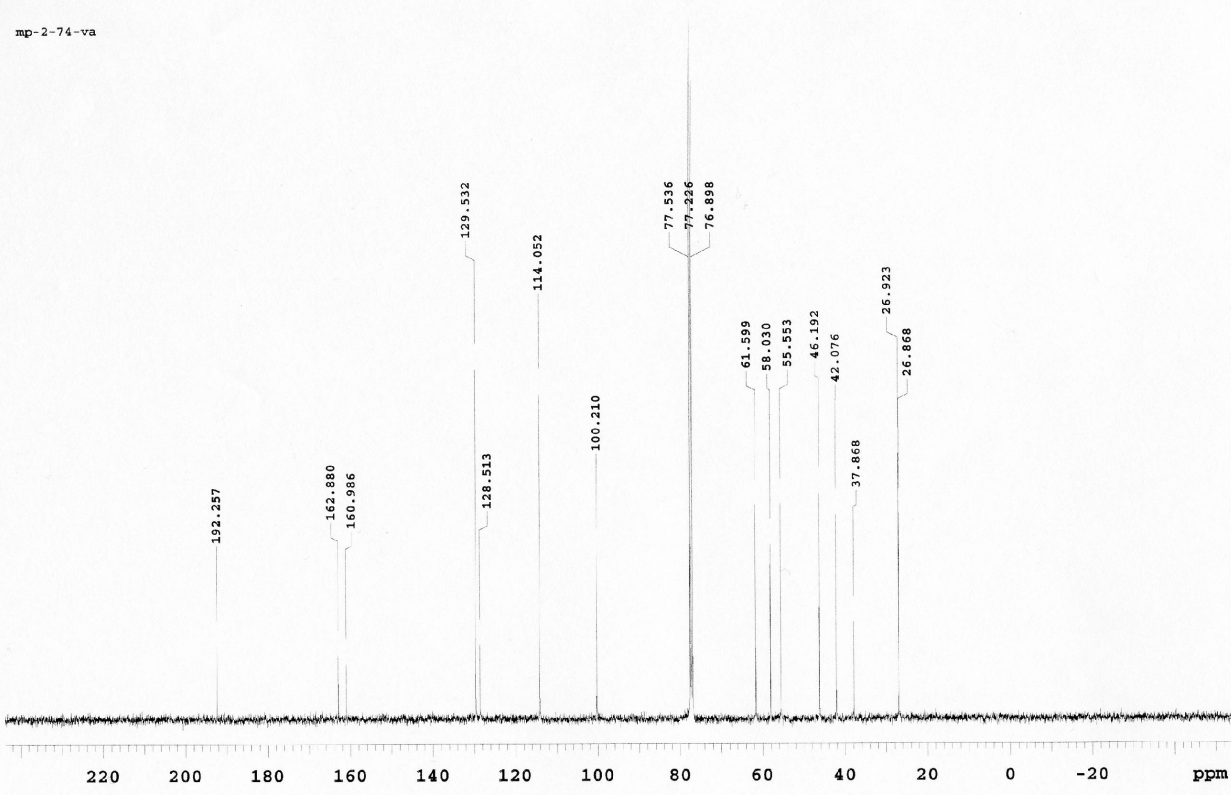

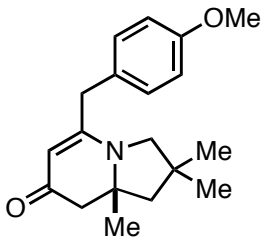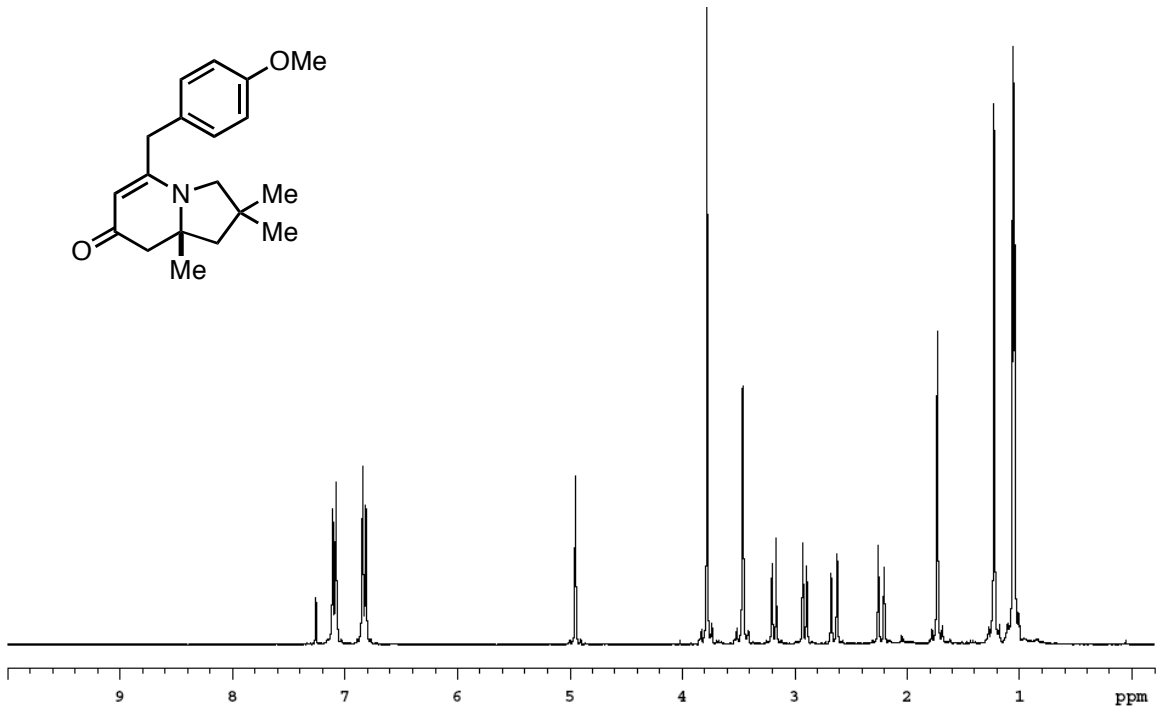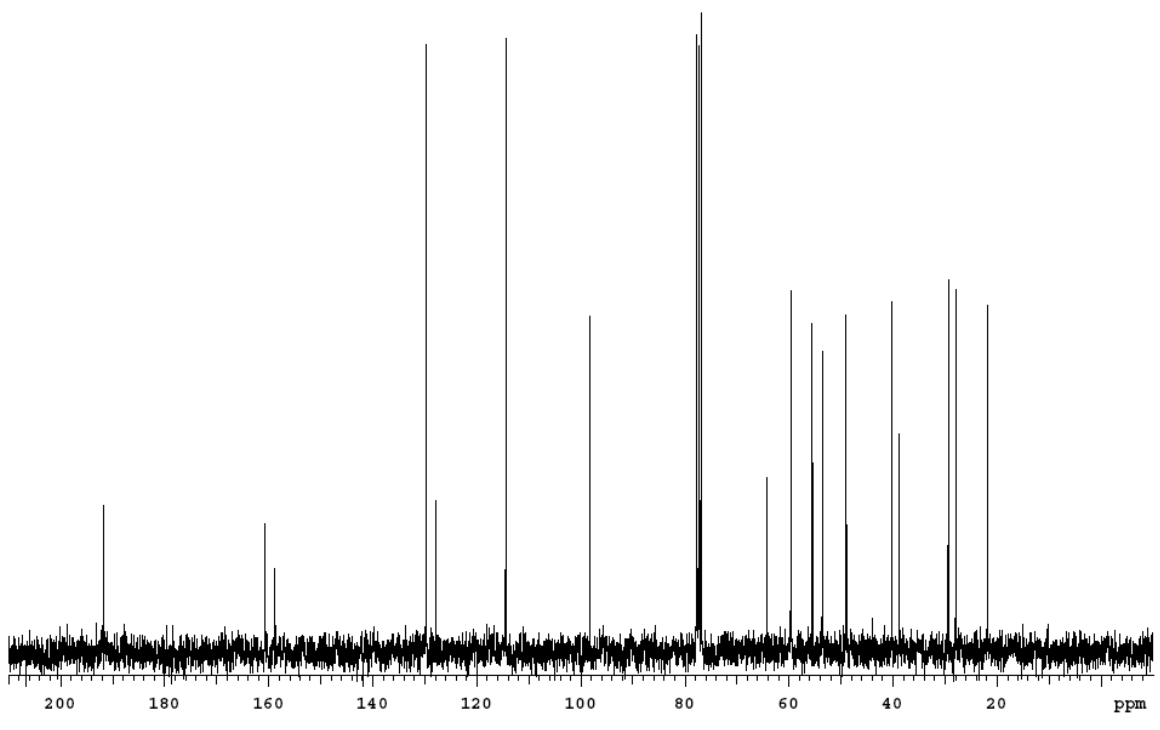

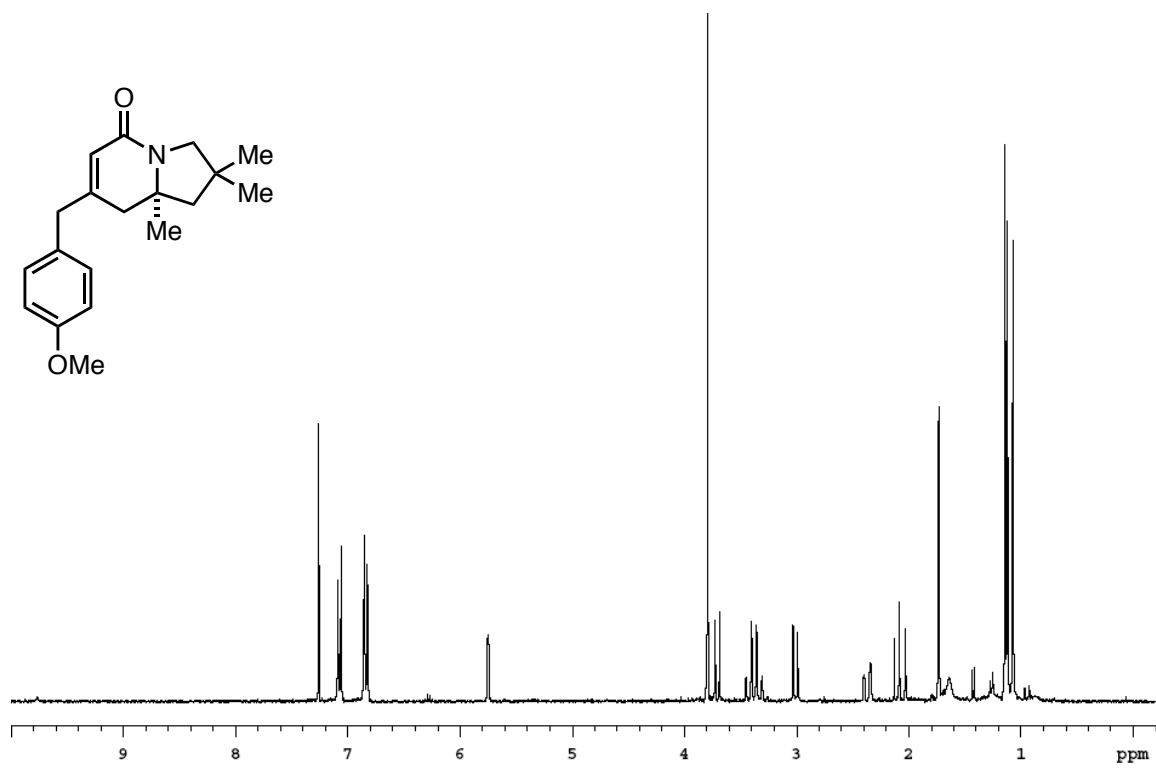



mp-2-10-va-proton

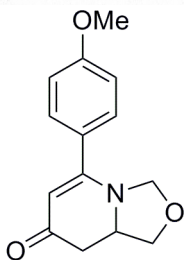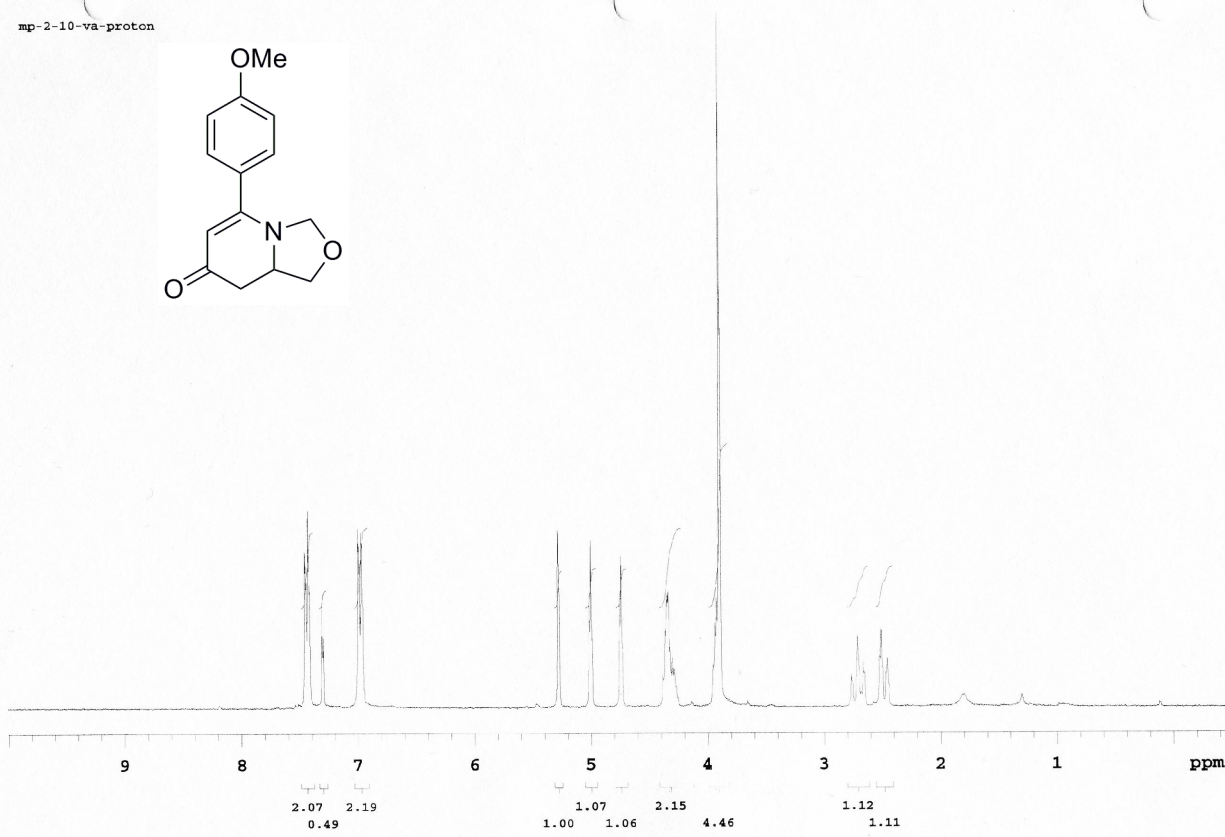

mp-2-10-va

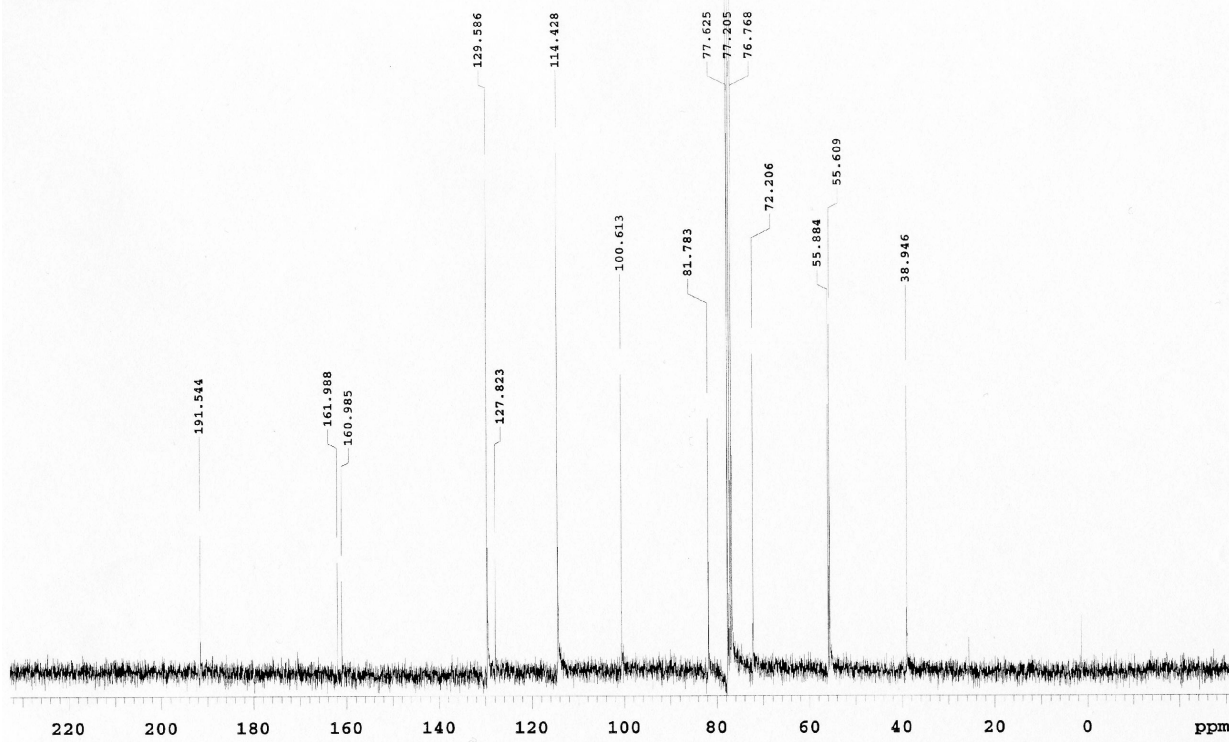

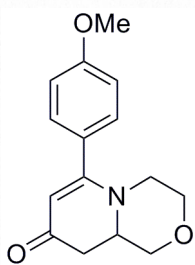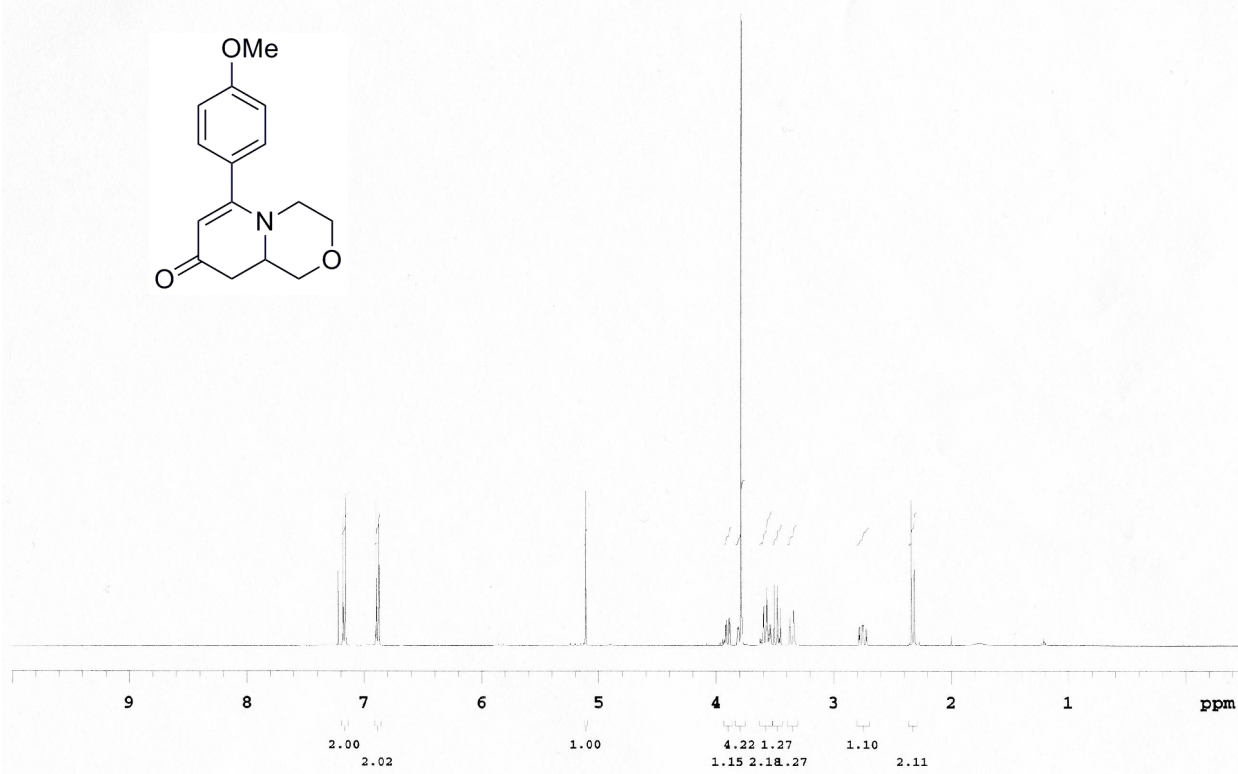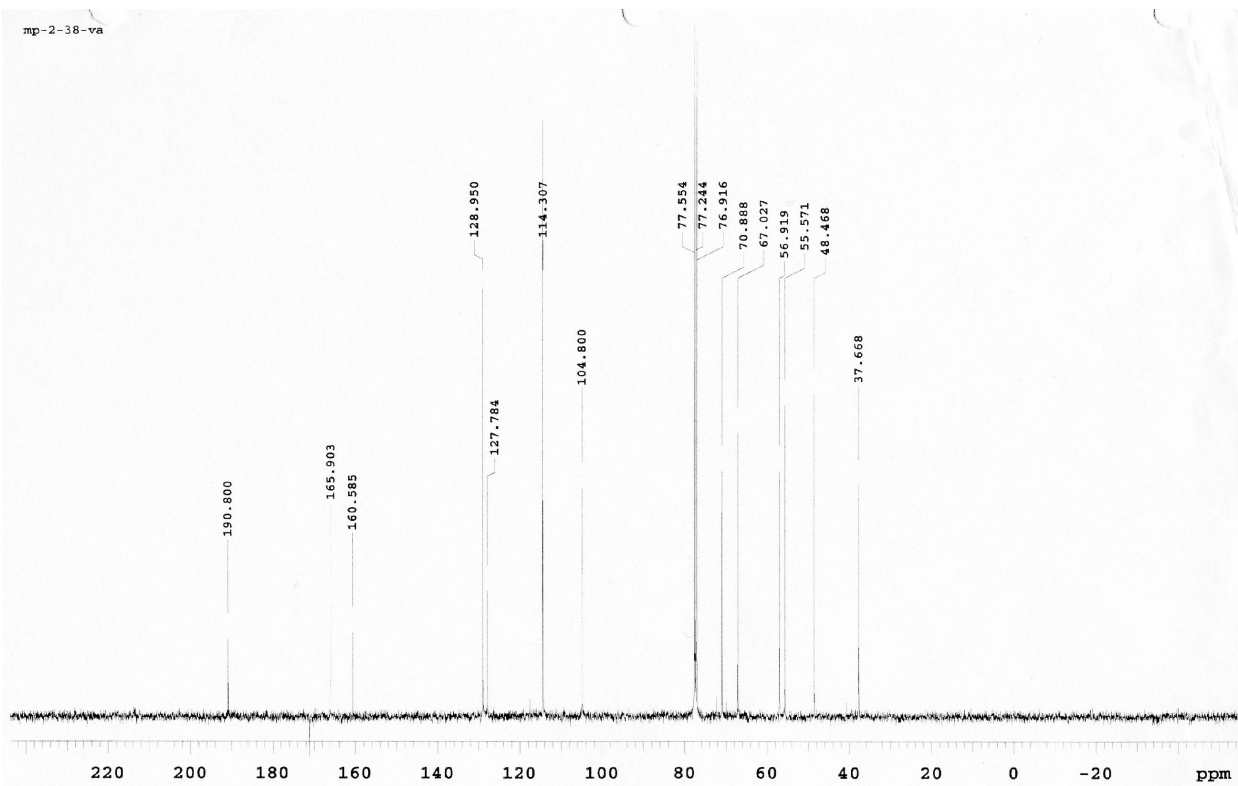

## Crystallographic Data:

All single crystals were coated in oil, transferred to a goniometer head, and mounted on a Bruker Kappa Apex CCD diffractometer under a stream of dinitrogen. All data collections were performed with Mo K $\alpha$  radiation and a graphite monochromator. Data sets were taken with complete coverage and fourfold redundancy at 120K. Data was integrated and corrected for absorption effects with the Apex 2 software package.<sup>6</sup> Structures were solved with the SHELXTL software package.<sup>7</sup> All non-hydrogen atoms were refined with anisotropic thermal parameters and hydrogen atoms placed in idealized positions. Crystal data and structure parameters are provided as CIF files. Rhodium alkene bond distances were generated in XP using cent/x and join.

**Table 1.** Crystal data and structure refinement for **T1**.

|                                   |                                                                       |                             |
|-----------------------------------|-----------------------------------------------------------------------|-----------------------------|
| Identification code               | rovis53_0m                                                            |                             |
| Empirical formula                 | C <sub>43</sub> H <sub>50</sub> Cl <sub>5</sub> N O <sub>4</sub> P Rh |                             |
| Formula weight                    | 955.97                                                                |                             |
| Temperature                       | 120 K                                                                 |                             |
| Wavelength                        | 0.71073 Å                                                             |                             |
| Crystal system                    | Monoclinic                                                            |                             |
| Space group                       | P 2 <sub>1</sub>                                                      |                             |
| Unit cell dimensions              | $a = 10.8877(3)$ Å                                                    | $\alpha = 90^\circ$         |
|                                   | $b = 18.0279(5)$ Å                                                    | $\beta = 91.9240(10)^\circ$ |
|                                   | $c = 11.1484(3)$ Å                                                    | $\gamma = 90^\circ$         |
| Volume                            | 2187.00(10) Å <sup>3</sup>                                            |                             |
| Z                                 | 2                                                                     |                             |
| Density (calculated)              | 1.452 Mg/m <sup>3</sup>                                               |                             |
| Absorption coefficient            | 0.774 mm <sup>-1</sup>                                                |                             |
| F(000)                            | 984                                                                   |                             |
| Crystal size                      | 0.39 x 0.13 x 0.11 mm <sup>3</sup>                                    |                             |
| Theta range for data collection   | 1.83 to 40.55°.                                                       |                             |
| Index ranges                      | -19<=h<=19, -26<=k<=32, -19<=l<=20                                    |                             |
| Reflections collected             | 54541                                                                 |                             |
| Independent reflections           | 23417 [R(int) = 0.0421]                                               |                             |
| Completeness to theta = 40.55°    | 98.0 %                                                                |                             |
| Absorption correction             | Multi-scan                                                            |                             |
| Max. and min. transmission        | 0.9197 and 0.7512                                                     |                             |
| Refinement method                 | Full-matrix least-squares on F <sup>2</sup>                           |                             |
| Data / restraints / parameters    | 23417 / 1 / 500                                                       |                             |
| Goodness-of-fit on F <sup>2</sup> | 1.005                                                                 |                             |
| Final R indices [I>2sigma(I)]     | R1 = 0.0511, wR2 = 0.1067                                             |                             |
| R indices (all data)              | R1 = 0.0786, wR2 = 0.1195                                             |                             |
| Absolute structure parameter      | -0.018(16)                                                            |                             |
| Largest diff. peak and hole       | 1.854 and -1.097 e.Å <sup>-3</sup>                                    |                             |

**Table 2.** Atomic coordinates ( $\times 10^4$ ) and equivalent isotropic displacement parameters ( $\text{\AA}^2 \times 10^3$ ) for **T1**.  $U(\text{eq})$  is defined as one third of the trace of the orthogonalized  $U^{ij}$  tensor.

|       | x        | y       | z        | $U(\text{eq})$ |
|-------|----------|---------|----------|----------------|
| C(1)  | 3074(3)  | 6207(2) | 7166(3)  | 29(1)          |
| C(2)  | 1226(2)  | 5493(1) | 507(2)   | 14(1)          |
| C(3)  | 2484(2)  | 5460(2) | 292(2)   | 18(1)          |
| C(4)  | 3092(2)  | 4786(2) | 259(3)   | 23(1)          |
| C(5)  | 2441(3)  | 4130(2) | 424(3)   | 26(1)          |
| C(6)  | 1199(3)  | 4155(2) | 620(3)   | 24(1)          |
| C(7)  | 585(2)   | 4834(1) | 653(2)   | 19(1)          |
| C(8)  | 590(2)   | 6245(1) | 512(2)   | 12(1)          |
| C(9)  | 402(2)   | 6528(1) | -775(2)  | 14(1)          |
| C(10) | 727(2)   | 7236(1) | -1124(2) | 18(1)          |
| C(11) | 464(3)   | 7485(2) | -2298(2) | 26(1)          |
| C(12) | -134(3)  | 7017(2) | -3111(2) | 28(1)          |
| C(13) | -445(2)  | 6302(2) | -2783(2) | 22(1)          |
| C(14) | -162(2)  | 6053(2) | -1626(2) | 18(1)          |
| C(15) | -645(2)  | 6235(1) | 1178(2)  | 13(1)          |
| C(16) | -1006(2) | 7012(1) | 1583(2)  | 14(1)          |
| C(17) | -2642(2) | 6527(2) | 462(2)   | 17(1)          |
| C(18) | -3816(2) | 6144(2) | 798(3)   | 27(1)          |
| C(19) | -2745(2) | 6924(2) | -739(2)  | 22(1)          |
| C(20) | -2564(2) | 7261(2) | 4162(3)  | 30(1)          |
| C(21) | -3472(3) | 6945(2) | 4864(3)  | 38(1)          |
| C(22) | -3436(2) | 6196(2) | 5135(3)  | 34(1)          |
| C(23) | -2489(3) | 5767(2) | 4745(3)  | 27(1)          |
| C(24) | -1567(2) | 6084(2) | 4054(2)  | 22(1)          |
| C(25) | -1614(2) | 6831(2) | 3743(2)  | 16(1)          |
| C(26) | -654(2)  | 7170(1) | 2923(2)  | 13(1)          |
| C(27) | -1118(2) | 8524(2) | 2479(2)  | 20(1)          |
| C(28) | -497(2)  | 7996(2) | 3178(2)  | 16(1)          |
| C(29) | 192(2)   | 8227(2) | 4184(2)  | 20(1)          |
| C(30) | 242(3)   | 8973(2) | 4504(3)  | 27(1)          |
| C(31) | -413(3)  | 9495(2) | 3817(3)  | 30(1)          |
| C(32) | -1077(3) | 9275(2) | 2789(3)  | 26(1)          |

|       |          |         |         |        |
|-------|----------|---------|---------|--------|
| C(33) | 1872(2)  | 5422(2) | 3435(3) | 23(1)  |
| C(34) | 3801(2)  | 6066(2) | 3106(3) | 22(1)  |
| C(35) | 3710(2)  | 9042(1) | 3233(2) | 19(1)  |
| C(36) | 4657(2)  | 8550(2) | 3073(2) | 20(1)  |
| C(37) | 5357(2)  | 8446(2) | 1933(3) | 23(1)  |
| C(38) | 4525(2)  | 8412(2) | 801(2)  | 23(1)  |
| C(39) | 3283(2)  | 8043(1) | 1008(2) | 17(1)  |
| C(40) | 2226(2)  | 8450(1) | 1316(2) | 15(1)  |
| C(41) | 3249(2)  | 9587(2) | 2281(2) | 22(1)  |
| C(42) | 2153(2)  | 9276(2) | 1524(2) | 20(1)  |
| C(43) | 3397(4)  | 8641(3) | 7535(5) | 56(1)  |
| Cl(1) | 3137(1)  | 7566(1) | 4920(1) | 21(1)  |
| Cl(2) | 3749(1)  | 5357(1) | 6704(1) | 38(1)  |
| Cl(3) | 4118(1)  | 6716(1) | 8085(1) | 47(1)  |
| Cl(4) | 4889(2)  | 8948(1) | 7369(2) | 119(1) |
| Cl(5) | 2367(2)  | 9333(1) | 7852(2) | 83(1)  |
| N(1)  | 2454(2)  | 6106(1) | 3050(2) | 16(1)  |
| O(1)  | -2308(2) | 7035(1) | 1402(2) | 19(1)  |
| O(2)  | -1664(2) | 5988(1) | 450(2)  | 17(1)  |
| O(3)  | 1374(1)  | 6787(1) | 1137(1) | 12(1)  |
| O(4)  | 493(1)   | 6771(1) | 3220(1) | 13(1)  |
| P(1)  | 1779(1)  | 6862(1) | 2553(1) | 12(1)  |
| Rh(1) | 2923(1)  | 7898(1) | 2860(1) | 13(1)  |

---

**Table 3.** Bond lengths [ $\text{\AA}$ ] and angles [ $^\circ$ ] for **T1**.

|             |          |                  |            |
|-------------|----------|------------------|------------|
| C(1)-Cl(3)  | 1.763(3) | C(26)-C(28)      | 1.525(4)   |
| C(1)-Cl(2)  | 1.784(4) | C(27)-C(28)      | 1.391(4)   |
| C(2)-C(7)   | 1.391(3) | C(27)-C(32)      | 1.399(4)   |
| C(2)-C(3)   | 1.400(3) | C(28)-C(29)      | 1.393(3)   |
| C(2)-C(8)   | 1.521(3) | C(29)-C(30)      | 1.392(4)   |
| C(3)-C(4)   | 1.385(4) | C(30)-C(31)      | 1.393(5)   |
| C(4)-C(5)   | 1.395(4) | C(31)-C(32)      | 1.392(5)   |
| C(5)-C(6)   | 1.378(4) | C(33)-N(1)       | 1.459(3)   |
| C(6)-C(7)   | 1.396(4) | C(34)-N(1)       | 1.468(3)   |
| C(8)-O(3)   | 1.460(3) | C(35)-C(36)      | 1.376(4)   |
| C(8)-C(9)   | 1.530(3) | C(35)-C(41)      | 1.520(4)   |
| C(8)-C(15)  | 1.558(3) | C(35)-Rh(1)      | 2.266(2)   |
| C(9)-C(10)  | 1.384(3) | C(36)-C(37)      | 1.516(4)   |
| C(9)-C(14)  | 1.404(3) | C(36)-Rh(1)      | 2.230(2)   |
| C(10)-C(11) | 1.404(3) | C(37)-C(38)      | 1.528(4)   |
| C(11)-C(12) | 1.385(4) | C(38)-C(39)      | 1.531(3)   |
| C(12)-C(13) | 1.386(4) | C(39)-C(40)      | 1.417(3)   |
| C(13)-C(14) | 1.390(3) | C(39)-Rh(1)      | 2.130(2)   |
| C(15)-O(2)  | 1.424(3) | C(40)-C(42)      | 1.509(4)   |
| C(15)-C(16) | 1.527(3) | C(40)-Rh(1)      | 2.107(2)   |
| C(16)-O(1)  | 1.425(3) | C(41)-C(42)      | 1.544(4)   |
| C(16)-C(26) | 1.556(3) | C(43)-Cl(5)      | 1.721(5)   |
| C(17)-O(1)  | 1.429(3) | C(43)-Cl(4)      | 1.732(5)   |
| C(17)-O(2)  | 1.442(3) | Cl(1)-Rh(1)      | 2.3777(6)  |
| C(17)-C(18) | 1.511(4) | N(1)-P(1)        | 1.637(2)   |
| C(17)-C(19) | 1.519(4) | O(3)-P(1)        | 1.6300(16) |
| C(20)-C(25) | 1.386(4) | O(4)-P(1)        | 1.6153(16) |
| C(20)-C(21) | 1.402(4) | P(1)-Rh(1)       | 2.2648(6)  |
| C(21)-C(22) | 1.383(5) | Cl(3)-C(1)-Cl(2) | 110.53(16) |
| C(22)-C(23) | 1.372(5) | C(7)-C(2)-C(3)   | 118.8(2)   |
| C(23)-C(24) | 1.406(4) | C(7)-C(2)-C(8)   | 122.0(2)   |
| C(24)-C(25) | 1.392(4) | C(3)-C(2)-C(8)   | 119.1(2)   |
| C(25)-C(26) | 1.537(3) | C(4)-C(3)-C(2)   | 120.9(2)   |
| C(26)-O(4)  | 1.468(3) | C(3)-C(4)-C(5)   | 119.7(2)   |
|             |          | C(6)-C(5)-C(4)   | 120.0(3)   |

|                   |            |                   |            |
|-------------------|------------|-------------------|------------|
| C(5)-C(6)-C(7)    | 120.3(3)   | O(4)-C(26)-C(25)  | 105.20(18) |
| C(2)-C(7)-C(6)    | 120.3(2)   | C(28)-C(26)-C(25) | 110.54(19) |
| O(3)-C(8)-C(2)    | 109.83(17) | O(4)-C(26)-C(16)  | 107.92(17) |
| O(3)-C(8)-C(9)    | 106.34(17) | C(28)-C(26)-C(16) | 112.29(19) |
| C(2)-C(8)-C(9)    | 109.85(18) | C(25)-C(26)-C(16) | 110.36(18) |
| O(3)-C(8)-C(15)   | 106.30(17) | C(28)-C(27)-C(32) | 120.9(3)   |
| C(2)-C(8)-C(15)   | 113.08(18) | C(27)-C(28)-C(29) | 119.0(3)   |
| C(9)-C(8)-C(15)   | 111.15(17) | C(27)-C(28)-C(26) | 121.0(2)   |
| C(10)-C(9)-C(14)  | 118.8(2)   | C(29)-C(28)-C(26) | 119.8(2)   |
| C(10)-C(9)-C(8)   | 123.0(2)   | C(30)-C(29)-C(28) | 120.7(3)   |
| C(14)-C(9)-C(8)   | 118.2(2)   | C(29)-C(30)-C(31) | 119.8(3)   |
| C(9)-C(10)-C(11)  | 120.8(2)   | C(32)-C(31)-C(30) | 120.1(3)   |
| C(12)-C(11)-C(10) | 119.5(3)   | C(31)-C(32)-C(27) | 119.4(3)   |
| C(11)-C(12)-C(13) | 120.5(2)   | C(36)-C(35)-C(41) | 123.8(2)   |
| C(12)-C(13)-C(14) | 119.8(2)   | C(36)-C(35)-Rh(1) | 70.77(15)  |
| C(13)-C(14)-C(9)  | 120.5(2)   | C(41)-C(35)-Rh(1) | 110.26(16) |
| O(2)-C(15)-C(16)  | 104.60(17) | C(35)-C(36)-C(37) | 126.1(2)   |
| O(2)-C(15)-C(8)   | 113.61(18) | C(35)-C(36)-Rh(1) | 73.61(14)  |
| C(16)-C(15)-C(8)  | 111.45(18) | C(37)-C(36)-Rh(1) | 106.97(17) |
| O(1)-C(16)-C(15)  | 104.45(18) | C(36)-C(37)-C(38) | 113.4(2)   |
| O(1)-C(16)-C(26)  | 110.04(18) | C(37)-C(38)-C(39) | 113.3(2)   |
| C(15)-C(16)-C(26) | 113.16(18) | C(40)-C(39)-C(38) | 122.7(2)   |
| O(1)-C(17)-O(2)   | 105.60(17) | C(40)-C(39)-Rh(1) | 69.58(13)  |
| O(1)-C(17)-C(18)  | 108.0(2)   | C(38)-C(39)-Rh(1) | 112.99(16) |
| O(2)-C(17)-C(18)  | 108.9(2)   | C(39)-C(40)-C(42) | 126.5(2)   |
| O(1)-C(17)-C(19)  | 110.7(2)   | C(39)-C(40)-Rh(1) | 71.36(13)  |
| O(2)-C(17)-C(19)  | 109.98(19) | C(42)-C(40)-Rh(1) | 111.08(16) |
| C(18)-C(17)-C(19) | 113.3(2)   | C(35)-C(41)-C(42) | 112.2(2)   |
| C(25)-C(20)-C(21) | 120.7(3)   | C(40)-C(42)-C(41) | 113.5(2)   |
| C(22)-C(21)-C(20) | 120.2(3)   | Cl(5)-C(43)-Cl(4) | 114.2(3)   |
| C(23)-C(22)-C(21) | 119.8(3)   | C(33)-N(1)-C(34)  | 112.9(2)   |
| C(22)-C(23)-C(24) | 120.1(3)   | C(33)-N(1)-P(1)   | 127.56(16) |
| C(25)-C(24)-C(23) | 120.6(3)   | C(34)-N(1)-P(1)   | 119.52(17) |
| C(20)-C(25)-C(24) | 118.6(2)   | C(16)-O(1)-C(17)  | 108.22(17) |
| C(20)-C(25)-C(26) | 120.6(2)   | C(15)-O(2)-C(17)  | 110.19(18) |
| C(24)-C(25)-C(26) | 120.8(2)   | C(8)-O(3)-P(1)    | 130.68(14) |
| O(4)-C(26)-C(28)  | 110.26(17) | C(26)-O(4)-P(1)   | 126.17(14) |

|                   |            |                   |           |
|-------------------|------------|-------------------|-----------|
| O(4)-P(1)-O(3)    | 103.16(8)  | C(40)-Rh(1)-C(35) | 81.04(9)  |
| O(4)-P(1)-N(1)    | 98.40(10)  | C(39)-Rh(1)-C(35) | 89.20(9)  |
| O(3)-P(1)-N(1)    | 111.29(10) | C(36)-Rh(1)-C(35) | 35.62(9)  |
| O(4)-P(1)-Rh(1)   | 119.67(7)  | P(1)-Rh(1)-C(35)  | 168.73(7) |
| O(3)-P(1)-Rh(1)   | 110.11(6)  | C(40)-Rh(1)-Cl(1) | 158.25(7) |
| N(1)-P(1)-Rh(1)   | 113.35(8)  | C(39)-Rh(1)-Cl(1) | 162.17(6) |
| C(40)-Rh(1)-C(39) | 39.06(9)   | C(36)-Rh(1)-Cl(1) | 88.55(7)  |
| C(40)-Rh(1)-C(36) | 96.83(9)   | P(1)-Rh(1)-Cl(1)  | 88.50(2)  |
| C(39)-Rh(1)-C(36) | 81.75(9)   | C(35)-Rh(1)-Cl(1) | 91.57(7)  |
| C(40)-Rh(1)-P(1)  | 94.83(7)   |                   |           |
| C(39)-Rh(1)-P(1)  | 94.17(6)   |                   |           |
| C(36)-Rh(1)-P(1)  | 155.60(7)  |                   |           |

---

Symmetry transformations used to generate equivalent atoms:



**Table 4.** Anisotropic displacement parameters ( $\text{\AA}^2 \times 10^3$ ) for **T1**. The anisotropic displacement factor exponent takes the form:  $-2p^2 [ h^2 a^{*2} U^{11} + \dots + 2 h k a^* b^* U^{12} ]$

|       | $U^{11}$ | $U^{22}$ | $U^{33}$ | $U^{23}$ | $U^{13}$ | $U^{12}$ |
|-------|----------|----------|----------|----------|----------|----------|
| C(1)  | 24(1)    | 34(2)    | 30(1)    | 8(1)     | -1(1)    | -1(1)    |
| C(2)  | 15(1)    | 12(1)    | 15(1)    | 0(1)     | 1(1)     | 0(1)     |
| C(3)  | 16(1)    | 19(1)    | 20(1)    | -1(1)    | 5(1)     | -1(1)    |
| C(4)  | 17(1)    | 20(1)    | 32(1)    | -4(1)    | 3(1)     | 6(1)     |
| C(5)  | 30(1)    | 17(1)    | 31(1)    | -2(1)    | -2(1)    | 6(1)     |
| C(6)  | 30(1)    | 13(1)    | 28(1)    | -1(1)    | 3(1)     | 0(1)     |
| C(7)  | 20(1)    | 15(1)    | 21(1)    | 0(1)     | 0(1)     | -1(1)    |
| C(8)  | 11(1)    | 11(1)    | 13(1)    | 0(1)     | 1(1)     | -1(1)    |
| C(9)  | 15(1)    | 14(1)    | 12(1)    | 0(1)     | 1(1)     | 2(1)     |
| C(10) | 24(1)    | 16(1)    | 15(1)    | 1(1)     | 0(1)     | -3(1)    |
| C(11) | 34(1)    | 26(1)    | 17(1)    | 7(1)     | -2(1)    | -6(1)    |
| C(12) | 34(1)    | 36(2)    | 13(1)    | 4(1)     | -2(1)    | -6(1)    |
| C(13) | 26(1)    | 27(1)    | 13(1)    | -2(1)    | -3(1)    | -1(1)    |
| C(14) | 19(1)    | 18(1)    | 17(1)    | 0(1)     | -1(1)    | -2(1)    |
| C(15) | 12(1)    | 15(1)    | 12(1)    | 0(1)     | 0(1)     | -1(1)    |
| C(16) | 13(1)    | 15(1)    | 14(1)    | 1(1)     | -1(1)    | 2(1)     |
| C(17) | 14(1)    | 20(1)    | 17(1)    | -3(1)    | -1(1)    | 0(1)     |
| C(18) | 15(1)    | 35(2)    | 31(1)    | 2(1)     | 2(1)     | -2(1)    |
| C(19) | 18(1)    | 28(1)    | 19(1)    | 1(1)     | -4(1)    | 2(1)     |
| C(20) | 18(1)    | 40(2)    | 32(1)    | 15(1)    | 9(1)     | 7(1)     |
| C(21) | 21(1)    | 53(2)    | 41(2)    | 17(2)    | 17(1)    | 8(1)     |
| C(22) | 15(1)    | 59(2)    | 28(1)    | 23(1)    | 2(1)     | -7(1)    |
| C(23) | 31(1)    | 29(2)    | 22(1)    | 7(1)     | 1(1)     | -14(1)   |
| C(24) | 24(1)    | 23(1)    | 18(1)    | 0(1)     | 5(1)     | -6(1)    |
| C(25) | 12(1)    | 23(1)    | 14(1)    | 5(1)     | 1(1)     | -3(1)    |
| C(26) | 11(1)    | 16(1)    | 13(1)    | 0(1)     | 1(1)     | 1(1)     |
| C(27) | 19(1)    | 20(1)    | 21(1)    | 2(1)     | 7(1)     | 3(1)     |
| C(28) | 15(1)    | 19(1)    | 16(1)    | -2(1)    | 5(1)     | -1(1)    |
| C(29) | 20(1)    | 22(1)    | 18(1)    | -2(1)    | 3(1)     | -5(1)    |
| C(30) | 31(1)    | 23(1)    | 28(1)    | -9(1)    | 7(1)     | -5(1)    |
| C(31) | 36(2)    | 17(1)    | 38(2)    | -10(1)   | 18(1)    | -3(1)    |
| C(32) | 26(1)    | 18(1)    | 34(1)    | 4(1)     | 12(1)    | 5(1)     |

|       |        |        |        |        |        |        |
|-------|--------|--------|--------|--------|--------|--------|
| C(33) | 22(1)  | 17(1)  | 28(1)  | 10(1)  | -5(1)  | -3(1)  |
| C(34) | 14(1)  | 24(1)  | 28(1)  | 2(1)   | 1(1)   | 3(1)   |
| C(35) | 20(1)  | 15(1)  | 20(1)  | -3(1)  | 1(1)   | -5(1)  |
| C(36) | 14(1)  | 19(1)  | 26(1)  | 2(1)   | -3(1)  | -4(1)  |
| C(37) | 14(1)  | 23(1)  | 32(1)  | -1(1)  | 3(1)   | -3(1)  |
| C(38) | 19(1)  | 23(1)  | 27(1)  | -2(1)  | 9(1)   | -4(1)  |
| C(39) | 17(1)  | 19(1)  | 14(1)  | 0(1)   | 2(1)   | -4(1)  |
| C(40) | 16(1)  | 16(1)  | 14(1)  | 0(1)   | 2(1)   | -1(1)  |
| C(41) | 26(1)  | 12(1)  | 27(1)  | -1(1)  | 1(1)   | -2(1)  |
| C(42) | 22(1)  | 16(1)  | 23(1)  | 2(1)   | 0(1)   | 1(1)   |
| C(43) | 53(2)  | 53(3)  | 61(3)  | -22(2) | 0(2)   | -1(2)  |
| Cl(1) | 23(1)  | 25(1)  | 14(1)  | 0(1)   | -1(1)  | -3(1)  |
| Cl(2) | 29(1)  | 36(1)  | 51(1)  | 10(1)  | 12(1)  | 0(1)   |
| Cl(3) | 43(1)  | 52(1)  | 45(1)  | 7(1)   | -12(1) | -17(1) |
| Cl(4) | 67(1)  | 161(2) | 131(2) | -45(2) | 11(1)  | -50(1) |
| Cl(5) | 118(1) | 44(1)  | 90(1)  | -13(1) | 38(1)  | 11(1)  |
| N(1)  | 12(1)  | 15(1)  | 20(1)  | 3(1)   | -1(1)  | 0(1)   |
| O(1)  | 13(1)  | 24(1)  | 17(1)  | -5(1)  | -2(1)  | 3(1)   |
| O(2)  | 12(1)  | 19(1)  | 20(1)  | -2(1)  | -3(1)  | -1(1)  |
| O(3)  | 13(1)  | 12(1)  | 12(1)  | 0(1)   | -1(1)  | -3(1)  |
| O(4)  | 12(1)  | 14(1)  | 14(1)  | 3(1)   | 2(1)   | 0(1)   |
| P(1)  | 11(1)  | 13(1)  | 11(1)  | 1(1)   | 0(1)   | -1(1)  |
| Rh(1) | 12(1)  | 13(1)  | 13(1)  | -1(1)  | 1(1)   | -2(1)  |

---

**Table 5.** Hydrogen coordinates ( $\times 10^4$ ) and isotropic displacement parameters ( $\text{\AA}^2 \times 10^3$ ) for **T1**.

|        | x     | y    | z     | U(eq) |
|--------|-------|------|-------|-------|
| H(1A)  | 2838  | 6499 | 6465  | 35    |
| H(1B)  | 2339  | 6103 | 7605  | 35    |
| H(3)   | 2917  | 5897 | 169   | 22    |
| H(4)   | 3931  | 4772 | 129   | 28    |
| H(5)   | 2845  | 3676 | 402   | 31    |
| H(6)   | 767   | 3716 | 730   | 28    |
| H(7)   | -256  | 4845 | 774   | 22    |
| H(10)  | 1123  | 7550 | -575  | 22    |
| H(11)  | 691   | 7960 | -2527 | 31    |
| H(12)  | -330  | 7185 | -3883 | 34    |
| H(13)  | -841  | 5989 | -3335 | 26    |
| H(14)  | -349  | 5568 | -1414 | 21    |
| H(15)  | -556  | 5913 | 1884  | 15    |
| H(16)  | -625  | 7384 | 1073  | 17    |
| H(18A) | -3702 | 5917 | 1573  | 40    |
| H(18B) | -4021 | 5769 | 213   | 40    |
| H(18C) | -4469 | 6500 | 822   | 40    |
| H(19A) | -3383 | 7290 | -717  | 33    |
| H(19B) | -2938 | 6571 | -1362 | 33    |
| H(19C) | -1978 | 7161 | -897  | 33    |
| H(20)  | -2599 | 7763 | 3976  | 35    |
| H(21)  | -4100 | 7240 | 5148  | 45    |
| H(22)  | -4052 | 5985 | 5580  | 40    |
| H(23)  | -2456 | 5265 | 4937  | 33    |
| H(24)  | -921  | 5791 | 3803  | 26    |
| H(27)  | -1566 | 8375 | 1796  | 24    |
| H(29)  | 625   | 7880 | 4648  | 24    |
| H(30)  | 709   | 9123 | 5174  | 33    |
| H(31)  | -405  | 9991 | 4045  | 36    |
| H(32)  | -1491 | 9625 | 2314  | 31    |
| H(33A) | 2179  | 5012 | 2983  | 34    |

|        |      |       |      |    |
|--------|------|-------|------|----|
| H(33B) | 999  | 5459  | 3304 | 34 |
| H(33C) | 2057 | 5343  | 4274 | 34 |
| H(34A) | 4079 | 5957  | 3914 | 33 |
| H(34B) | 4136 | 6533  | 2863 | 33 |
| H(34C) | 4069 | 5682  | 2580 | 33 |
| H(35)  | 3630 | 9214  | 4061 | 22 |
| H(36)  | 5138 | 8438  | 3809 | 24 |
| H(37A) | 5828 | 7990  | 1996 | 28 |
| H(37B) | 5932 | 8852  | 1856 | 28 |
| H(38A) | 4944 | 8138  | 187  | 27 |
| H(38B) | 4385 | 8912  | 507  | 27 |
| H(39)  | 3113 | 7605  | 508  | 20 |
| H(40)  | 1457 | 8236  | 990  | 18 |
| H(41A) | 3914 | 9704  | 1755 | 26 |
| H(41B) | 3001 | 10043 | 2666 | 26 |
| H(42A) | 1398 | 9386  | 1927 | 24 |
| H(42B) | 2116 | 9526  | 753  | 24 |
| H(43A) | 3121 | 8394  | 6801 | 67 |
| H(43B) | 3394 | 8277  | 8176 | 67 |

---

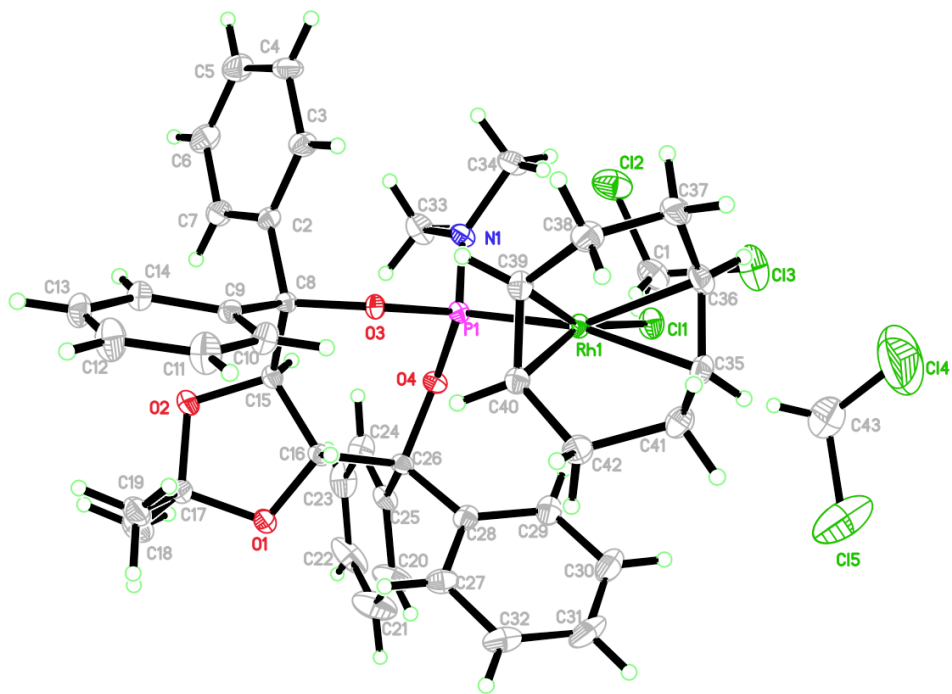

**Table 6.** Crystal data and structure refinement for **T2**.

|                                   |                                                                     |                             |
|-----------------------------------|---------------------------------------------------------------------|-----------------------------|
| Identification code               | <b>T2</b>                                                           |                             |
| Empirical formula                 | C <sub>45</sub> H <sub>52</sub> Cl <sub>5</sub> NO <sub>4</sub> PRh |                             |
| Formula weight                    | 982.01                                                              |                             |
| Temperature                       | 120 K                                                               |                             |
| Wavelength                        | 0.71073 Å                                                           |                             |
| Crystal system                    | Monoclinic                                                          |                             |
| Space group                       | P2 <sub>1</sub>                                                     |                             |
| Unit cell dimensions              | $a = 10.8926(7)$ Å                                                  | $\alpha = 90^\circ$ .       |
|                                   | $b = 18.1189(11)$ Å                                                 | $\beta = 91.835(3)^\circ$ . |
|                                   | $c = 11.2230(7)$ Å                                                  | $\gamma = 90^\circ$ .       |
| Volume                            | 2213.9(2) Å <sup>3</sup>                                            |                             |
| Z                                 | 2                                                                   |                             |
| Density (calculated)              | 1.473 Mg/m <sup>3</sup>                                             |                             |
| Absorption coefficient            | 0.767 mm <sup>-1</sup>                                              |                             |
| F(000)                            | 1012                                                                |                             |
| Crystal size                      | 0.32 x 0.30 x 0.26 mm <sup>3</sup>                                  |                             |
| Theta range for data collection   | 2.14 to 35.63°.                                                     |                             |
| Index ranges                      | -17 ≤ h ≤ 17, -29 ≤ k ≤ 29, -18 ≤ l ≤ 17                            |                             |
| Reflections collected             | 77157                                                               |                             |
| Independent reflections           | 20295 [R(int) = 0.0257]                                             |                             |
| Completeness to theta = 35.63°    | 100.0 %                                                             |                             |
| Absorption correction             | Semi-empirical from equivalents                                     |                             |
| Max. and min. transmission        | 0.8249 and 0.7898                                                   |                             |
| Refinement method                 | Full-matrix least-squares on F <sup>2</sup>                         |                             |
| Data / restraints / parameters    | 20295 / 1 / 517                                                     |                             |
| Goodness-of-fit on F <sup>2</sup> | 1.018                                                               |                             |
| Final R indices [I > 2σ(I)]       | R1 = 0.0232, wR2 = 0.0574                                           |                             |
| R indices (all data)              | R1 = 0.0246, wR2 = 0.0581                                           |                             |
| Absolute structure parameter      | -0.016(8)                                                           |                             |
| Largest diff. peak and hole       | 1.092 and -0.978 e.Å <sup>-3</sup>                                  |                             |

**Table 7.** Atomic coordinates ( $\times 10^4$ ) and equivalent isotropic displacement parameters ( $\text{\AA}^2 \times 10^3$ ) for **T2**.  $U(\text{eq})$  is defined as one third of the trace of the orthogonalized  $U^{ij}$  tensor.

|       | x        | y        | z        | $U(\text{eq})$ |
|-------|----------|----------|----------|----------------|
| C(1)  | -688(1)  | 709(1)   | 7937(1)  | 13(1)          |
| C(2)  | -1052(1) | 547(1)   | 6607(1)  | 14(1)          |
| C(3)  | -697(1)  | -230(1)  | 6211(1)  | 13(1)          |
| C(4)  | 541(1)   | -227(1)  | 5541(1)  | 12(1)          |
| C(5)  | -2589(1) | 816(1)   | 9192(1)  | 23(1)          |
| C(6)  | -1638(1) | 378(1)   | 8768(1)  | 15(1)          |
| C(7)  | -1592(1) | -365(1)  | 9092(1)  | 18(1)          |
| C(8)  | -2481(1) | -667(1)  | 9816(1)  | 24(1)          |
| C(9)  | 1168(1)  | -978(1)  | 5536(1)  | 13(1)          |
| C(10) | 534(1)   | -1632(1) | 5753(1)  | 19(1)          |
| C(11) | 2408(1)  | -1018(1) | 5240(1)  | 16(1)          |
| C(12) | 3007(1)  | -1692(1) | 5198(1)  | 21(1)          |
| C(13) | 1139(1)  | -2312(1) | 5707(1)  | 24(1)          |
| C(14) | -517(1)  | 1527(1)  | 8181(1)  | 15(1)          |
| C(15) | -1110(1) | 2061(1)  | 7475(1)  | 19(1)          |
| C(16) | 1754(1)  | -987(1)  | 8671(1)  | 19(1)          |
| C(17) | 3694(1)  | -502(1)  | 7975(1)  | 18(1)          |
| C(18) | 3942(1)  | -1072(1) | 8945(1)  | 24(1)          |
| C(19) | -1039(1) | 2806(1)  | 7778(1)  | 25(1)          |
| C(20) | 244(1)   | 2499(1)  | 9491(1)  | 26(1)          |
| C(21) | 178(1)   | 1753(1)  | 9187(1)  | 19(1)          |
| C(22) | 2373(1)  | -2343(1) | 5435(1)  | 24(1)          |
| C(23) | -2683(1) | 64(1)    | 5503(1)  | 17(1)          |
| C(24) | -2777(1) | 458(1)   | 4309(1)  | 21(1)          |
| C(25) | -3867(1) | -315(1)  | 5834(1)  | 27(1)          |
| C(26) | -3469(1) | 511(1)   | 9928(1)  | 30(1)          |
| C(27) | -3415(1) | -228(1)  | 10237(1) | 28(1)          |
| C(28) | -372(1)  | 3025(1)  | 8793(1)  | 28(1)          |
| C(29) | -213(1)  | -429(1)  | 3421(1)  | 17(1)          |
| C(30) | 348(1)   | 44(1)    | 4262(1)  | 13(1)          |
| C(31) | 674(1)   | 753(1)   | 3905(1)  | 16(1)          |
| C(32) | 416(1)   | 990(1)   | 2737(1)  | 22(1)          |

|       |          |          |         |       |
|-------|----------|----------|---------|-------|
| C(33) | 2784(1)  | -1552(1) | 8874(1) | 25(1) |
| C(34) | 2212(1)  | 1947(1)  | 6321(1) | 15(1) |
| C(35) | 3278(1)  | 1549(1)  | 6034(1) | 15(1) |
| C(36) | 4523(1)  | 1910(1)  | 5841(1) | 21(1) |
| C(37) | 5339(1)  | 1941(1)  | 6985(1) | 22(1) |
| C(38) | 4626(1)  | 2057(1)  | 8100(1) | 19(1) |
| C(39) | 3669(1)  | 2544(1)  | 8237(1) | 19(1) |
| C(40) | 3218(1)  | 3082(1)  | 7284(1) | 22(1) |
| C(41) | 2140(1)  | 2771(1)  | 6521(1) | 20(1) |
| C(42) | -179(1)  | 526(1)   | 1926(1) | 24(1) |
| C(43) | -484(1)  | -187(1)  | 2273(1) | 21(1) |
| C(45) | 6689(2)  | 7108(1)  | 7423(2) | 40(1) |
| C(46) | 6900(1)  | 4752(1)  | 7696(1) | 26(1) |
| Cl(1) | 3102(1)  | 1037(1)  | 9901(1) | 20(1) |
| Cl(2) | 5966(1)  | 5338(1)  | 6808(1) | 46(1) |
| Cl(3) | 6182(1)  | 3878(1)  | 7841(1) | 35(1) |
| Cl(4) | 5091(1)  | 7280(1)  | 7392(1) | 58(1) |
| Cl(5) | 7571(1)  | 7914(1)  | 7400(1) | 78(1) |
| N(1)  | 2348(1)  | -391(1)  | 8009(1) | 14(1) |
| O(1)  | 445(1)   | 305(1)   | 8221(1) | 13(1) |
| O(2)  | 1332(1)  | 315(1)   | 6140(1) | 12(1) |
| O(3)  | -1714(1) | -479(1)  | 5494(1) | 16(1) |
| O(4)  | -2352(1) | 567(1)   | 6438(1) | 19(1) |
| P(1)  | 1729(1)  | 384(1)   | 7545(1) | 11(1) |
| Rh(1) | 2890(1)  | 1400(1)  | 7862(1) | 12(1) |

---



**Table 8.** Bond lengths [ $\text{\AA}$ ] and angles [ $^\circ$ ] for **T2**.

|             |            |                 |            |
|-------------|------------|-----------------|------------|
| C(1)-O(1)   | 1.4607(13) | C(23)-C(25)     | 1.5171(17) |
| C(1)-C(14)  | 1.5188(15) | C(23)-C(24)     | 1.5188(18) |
| C(1)-C(6)   | 1.5371(15) | C(26)-C(27)     | 1.386(2)   |
| C(1)-C(2)   | 1.5594(15) | C(29)-C(43)     | 1.3844(17) |
| C(2)-O(4)   | 1.4228(13) | C(29)-C(30)     | 1.4001(15) |
| C(2)-C(3)   | 1.5291(16) | C(30)-C(31)     | 1.3938(16) |
| C(3)-O(3)   | 1.4210(13) | C(31)-C(32)     | 1.3987(16) |
| C(3)-C(4)   | 1.5655(14) | C(32)-C(42)     | 1.3847(19) |
| C(4)-O(2)   | 1.4569(12) | C(34)-C(35)     | 1.4131(16) |
| C(4)-C(9)   | 1.5214(15) | C(34)-C(41)     | 1.5125(17) |
| C(4)-C(30)  | 1.5260(14) | C(34)-Rh(1)     | 2.1071(11) |
| C(5)-C(26)  | 1.3994(19) | C(35)-C(36)     | 1.5270(16) |
| C(5)-C(6)   | 1.3999(17) | C(35)-Rh(1)     | 2.1252(11) |
| C(6)-C(7)   | 1.3947(17) | C(36)-C(37)     | 1.5387(19) |
| C(7)-C(8)   | 1.3959(17) | C(37)-C(38)     | 1.5086(19) |
| C(8)-C(27)  | 1.385(2)   | C(38)-C(39)     | 1.3781(18) |
| C(9)-C(10)  | 1.3960(16) | C(38)-Rh(1)     | 2.2439(11) |
| C(9)-C(11)  | 1.4029(15) | C(39)-C(40)     | 1.5171(18) |
| C(10)-C(13) | 1.4004(18) | C(39)-Rh(1)     | 2.2749(12) |
| C(11)-C(12) | 1.3877(17) | C(40)-C(41)     | 1.5382(18) |
| C(12)-C(22) | 1.396(2)   | C(42)-C(43)     | 1.392(2)   |
| C(13)-C(22) | 1.389(2)   | C(45)-Cl(5)     | 1.750(2)   |
| C(14)-C(15) | 1.3948(16) | C(45)-Cl(4)     | 1.769(2)   |
| C(14)-C(21) | 1.4004(16) | C(46)-Cl(2)     | 1.7585(16) |
| C(15)-C(19) | 1.3941(18) | C(46)-Cl(3)     | 1.7756(16) |
| C(16)-N(1)  | 1.4724(15) | Cl(1)-Rh(1)     | 2.3842(3)  |
| C(16)-C(33) | 1.5300(18) | N(1)-P(1)       | 1.6355(10) |
| C(17)-N(1)  | 1.4824(14) | O(1)-P(1)       | 1.6184(8)  |
| C(17)-C(18) | 1.5176(18) | O(2)-P(1)       | 1.6263(8)  |
| C(18)-C(33) | 1.532(2)   | P(1)-Rh(1)      | 2.2547(3)  |
| C(19)-C(28) | 1.389(2)   | O(1)-C(1)-C(14) | 110.61(8)  |
| C(20)-C(28) | 1.392(2)   | O(1)-C(1)-C(6)  | 104.68(8)  |
| C(20)-C(21) | 1.3953(19) | C(14)-C(1)-C(6) | 110.60(9)  |
| C(23)-O(4)  | 1.4275(15) | O(1)-C(1)-C(2)  | 107.60(8)  |
| C(23)-O(3)  | 1.4429(15) | C(14)-C(1)-C(2) | 112.42(9)  |

|                   |            |                   |            |
|-------------------|------------|-------------------|------------|
| C(6)-C(1)-C(2)    | 110.63(9)  | O(4)-C(23)-O(3)   | 105.76(9)  |
| O(4)-C(2)-C(3)    | 104.09(9)  | O(4)-C(23)-C(25)  | 107.79(10) |
| O(4)-C(2)-C(1)    | 110.14(9)  | O(3)-C(23)-C(25)  | 108.72(10) |
| C(3)-C(2)-C(1)    | 113.08(9)  | O(4)-C(23)-C(24)  | 110.93(10) |
| O(3)-C(3)-C(2)    | 104.92(8)  | O(3)-C(23)-C(24)  | 110.08(10) |
| O(3)-C(3)-C(4)    | 113.35(9)  | C(25)-C(23)-C(24) | 113.25(10) |
| C(2)-C(3)-C(4)    | 111.53(8)  | C(27)-C(26)-C(5)  | 120.36(13) |
| O(2)-C(4)-C(9)    | 110.20(8)  | C(8)-C(27)-C(26)  | 119.69(12) |
| O(2)-C(4)-C(30)   | 106.18(8)  | C(19)-C(28)-C(20) | 119.75(12) |
| C(9)-C(4)-C(30)   | 109.46(8)  | C(43)-C(29)-C(30) | 120.61(11) |
| O(2)-C(4)-C(3)    | 106.61(8)  | C(31)-C(30)-C(29) | 118.67(10) |
| C(9)-C(4)-C(3)    | 113.16(8)  | C(31)-C(30)-C(4)  | 122.59(9)  |
| C(30)-C(4)-C(3)   | 110.97(8)  | C(29)-C(30)-C(4)  | 118.71(9)  |
| C(26)-C(5)-C(6)   | 120.29(13) | C(30)-C(31)-C(32) | 120.44(11) |
| C(7)-C(6)-C(5)    | 118.70(11) | C(42)-C(32)-C(31) | 120.35(12) |
| C(7)-C(6)-C(1)    | 120.95(10) | C(16)-C(33)-C(18) | 103.11(10) |
| C(5)-C(6)-C(1)    | 120.33(11) | C(35)-C(34)-C(41) | 125.80(10) |
| C(6)-C(7)-C(8)    | 120.65(12) | C(35)-C(34)-Rh(1) | 71.19(6)   |
| C(27)-C(8)-C(7)   | 120.30(13) | C(41)-C(34)-Rh(1) | 111.17(8)  |
| C(10)-C(9)-C(11)  | 118.87(10) | C(34)-C(35)-C(36) | 123.59(10) |
| C(10)-C(9)-C(4)   | 122.22(9)  | C(34)-C(35)-Rh(1) | 69.81(6)   |
| C(11)-C(9)-C(4)   | 118.81(9)  | C(36)-C(35)-Rh(1) | 113.34(8)  |
| C(9)-C(10)-C(13)  | 120.34(11) | C(35)-C(36)-C(37) | 112.91(10) |
| C(12)-C(11)-C(9)  | 120.71(11) | C(38)-C(37)-C(36) | 113.47(10) |
| C(11)-C(12)-C(22) | 120.08(12) | C(39)-C(38)-C(37) | 126.37(12) |
| C(22)-C(13)-C(10) | 120.21(12) | C(39)-C(38)-Rh(1) | 73.48(7)   |
| C(15)-C(14)-C(21) | 118.96(11) | C(37)-C(38)-Rh(1) | 106.32(8)  |
| C(15)-C(14)-C(1)  | 121.54(10) | C(38)-C(39)-C(40) | 124.23(12) |
| C(21)-C(14)-C(1)  | 119.34(10) | C(38)-C(39)-Rh(1) | 71.02(7)   |
| C(19)-C(15)-C(14) | 120.79(12) | C(40)-C(39)-Rh(1) | 110.17(8)  |
| N(1)-C(16)-C(33)  | 103.50(10) | C(39)-C(40)-C(41) | 112.42(10) |
| N(1)-C(17)-C(18)  | 103.12(10) | C(34)-C(41)-C(40) | 113.73(10) |
| C(17)-C(18)-C(33) | 102.80(10) | C(32)-C(42)-C(43) | 119.36(11) |
| C(28)-C(19)-C(15) | 119.97(13) | C(29)-C(43)-C(42) | 120.52(11) |
| C(28)-C(20)-C(21) | 120.37(13) | Cl(5)-C(45)-Cl(4) | 113.10(11) |
| C(20)-C(21)-C(14) | 120.14(12) | Cl(2)-C(46)-Cl(3) | 110.00(8)  |
| C(13)-C(22)-C(12) | 119.76(12) | C(16)-N(1)-C(17)  | 111.36(9)  |

|                   |           |                   |            |
|-------------------|-----------|-------------------|------------|
| C(16)-N(1)-P(1)   | 127.40(8) | C(34)-Rh(1)-P(1)  | 94.27(3)   |
| C(17)-N(1)-P(1)   | 120.45(8) | C(35)-Rh(1)-P(1)  | 94.55(3)   |
| C(1)-O(1)-P(1)    | 126.14(7) | C(38)-Rh(1)-P(1)  | 156.70(3)  |
| C(4)-O(2)-P(1)    | 129.39(7) | C(34)-Rh(1)-C(39) | 80.89(4)   |
| C(3)-O(3)-C(23)   | 109.69(9) | C(35)-Rh(1)-C(39) | 88.75(4)   |
| C(2)-O(4)-C(23)   | 108.02(8) | C(38)-Rh(1)-C(39) | 35.50(5)   |
| O(1)-P(1)-O(2)    | 103.96(4) | P(1)-Rh(1)-C(39)  | 167.77(3)  |
| O(1)-P(1)-N(1)    | 97.37(4)  | C(34)-Rh(1)-Cl(1) | 159.72(3)  |
| O(2)-P(1)-N(1)    | 109.63(5) | C(35)-Rh(1)-Cl(1) | 160.95(3)  |
| O(1)-P(1)-Rh(1)   | 119.13(3) | C(38)-Rh(1)-Cl(1) | 88.66(3)   |
| O(2)-P(1)-Rh(1)   | 110.27(3) | P(1)-Rh(1)-Cl(1)  | 87.891(11) |
| N(1)-P(1)-Rh(1)   | 115.28(4) | C(39)-Rh(1)-Cl(1) | 92.84(3)   |
| C(34)-Rh(1)-C(35) | 39.01(4)  |                   |            |
| C(34)-Rh(1)-C(38) | 96.89(4)  |                   |            |
| C(35)-Rh(1)-C(38) | 81.64(4)  |                   |            |

---

Symmetry transformations used to generate equivalent atoms:

**Table 9.** Anisotropic displacement parameters ( $\text{\AA}^2 \times 10^3$ ) for **T2**. The anisotropic displacement factor exponent takes the form:  $-2\pi^2 [h^2 a^{*2} U^{11} + \dots + 2 h k a^* b^* U^{12}]$

|       | $U^{11}$ | $U^{22}$ | $U^{33}$ | $U^{23}$ | $U^{13}$ | $U^{12}$ |
|-------|----------|----------|----------|----------|----------|----------|
| C(1)  | 11(1)    | 15(1)    | 12(1)    | 1(1)     | 1(1)     | 1(1)     |
| C(2)  | 12(1)    | 16(1)    | 13(1)    | 0(1)     | 0(1)     | 1(1)     |
| C(3)  | 11(1)    | 15(1)    | 13(1)    | 0(1)     | -1(1)    | -2(1)    |
| C(4)  | 11(1)    | 12(1)    | 12(1)    | 0(1)     | 0(1)     | -2(1)    |
| C(5)  | 15(1)    | 32(1)    | 22(1)    | 7(1)     | 5(1)     | 5(1)     |
| C(6)  | 12(1)    | 21(1)    | 12(1)    | 2(1)     | 1(1)     | -2(1)    |
| C(7)  | 20(1)    | 21(1)    | 15(1)    | 1(1)     | 2(1)     | -6(1)    |
| C(8)  | 23(1)    | 30(1)    | 18(1)    | 5(1)     | 1(1)     | -11(1)   |
| C(9)  | 14(1)    | 12(1)    | 13(1)    | 0(1)     | -1(1)    | 0(1)     |
| C(10) | 20(1)    | 14(1)    | 24(1)    | 0(1)     | 1(1)     | -2(1)    |
| C(11) | 15(1)    | 16(1)    | 18(1)    | -1(1)    | 2(1)     | 2(1)     |
| C(12) | 19(1)    | 22(1)    | 22(1)    | -3(1)    | 0(1)     | 7(1)     |
| C(13) | 30(1)    | 13(1)    | 29(1)    | 0(1)     | 1(1)     | -1(1)    |
| C(14) | 14(1)    | 16(1)    | 16(1)    | -1(1)    | 3(1)     | 0(1)     |
| C(15) | 19(1)    | 17(1)    | 21(1)    | 2(1)     | 2(1)     | 3(1)     |
| C(16) | 18(1)    | 17(1)    | 23(1)    | 7(1)     | 2(1)     | 0(1)     |
| C(17) | 12(1)    | 21(1)    | 20(1)    | 1(1)     | 0(1)     | 3(1)     |
| C(18) | 20(1)    | 24(1)    | 27(1)    | 4(1)     | -6(1)    | 4(1)     |
| C(19) | 26(1)    | 16(1)    | 34(1)    | 2(1)     | 9(1)     | 5(1)     |
| C(20) | 29(1)    | 24(1)    | 25(1)    | -9(1)    | 6(1)     | -5(1)    |
| C(21) | 20(1)    | 20(1)    | 17(1)    | -3(1)    | 2(1)     | -2(1)    |
| C(22) | 30(1)    | 16(1)    | 27(1)    | -2(1)    | -3(1)    | 7(1)     |
| C(23) | 11(1)    | 22(1)    | 18(1)    | 0(1)     | -1(1)    | 0(1)     |
| C(24) | 18(1)    | 27(1)    | 18(1)    | 1(1)     | -3(1)    | 2(1)     |
| C(25) | 12(1)    | 35(1)    | 33(1)    | 5(1)     | 2(1)     | -4(1)    |
| C(26) | 15(1)    | 47(1)    | 27(1)    | 12(1)    | 7(1)     | 5(1)     |
| C(27) | 14(1)    | 48(1)    | 21(1)    | 10(1)    | 1(1)     | -8(1)    |
| C(28) | 33(1)    | 17(1)    | 34(1)    | -7(1)    | 13(1)    | -1(1)    |
| C(29) | 18(1)    | 18(1)    | 14(1)    | -1(1)    | -2(1)    | -2(1)    |
| C(30) | 13(1)    | 14(1)    | 11(1)    | 0(1)     | 0(1)     | 0(1)     |
| C(31) | 18(1)    | 17(1)    | 13(1)    | 2(1)     | -1(1)    | -2(1)    |
| C(32) | 26(1)    | 22(1)    | 16(1)    | 6(1)     | -2(1)    | -3(1)    |

|       |       |       |        |        |        |        |
|-------|-------|-------|--------|--------|--------|--------|
| C(33) | 23(1) | 18(1) | 34(1)  | 9(1)   | -1(1)  | 4(1)   |
| C(34) | 16(1) | 15(1) | 14(1)  | 1(1)   | -1(1)  | -1(1)  |
| C(35) | 16(1) | 16(1) | 14(1)  | 0(1)   | 2(1)   | -2(1)  |
| C(36) | 18(1) | 21(1) | 23(1)  | 0(1)   | 6(1)   | -3(1)  |
| C(37) | 13(1) | 24(1) | 30(1)  | 0(1)   | 2(1)   | -2(1)  |
| C(38) | 15(1) | 18(1) | 24(1)  | 0(1)   | -4(1)  | -4(1)  |
| C(39) | 20(1) | 15(1) | 21(1)  | -4(1)  | -2(1)  | -3(1)  |
| C(40) | 24(1) | 14(1) | 27(1)  | -1(1)  | -1(1)  | -1(1)  |
| C(41) | 19(1) | 16(1) | 24(1)  | 2(1)   | -1(1)  | 2(1)   |
| C(42) | 27(1) | 29(1) | 14(1)  | 3(1)   | -4(1)  | -1(1)  |
| C(43) | 22(1) | 26(1) | 15(1)  | -3(1)  | -4(1)  | -1(1)  |
| C(45) | 41(1) | 33(1) | 47(1)  | 6(1)   | 0(1)   | 5(1)   |
| C(46) | 20(1) | 32(1) | 27(1)  | -5(1)  | -2(1)  | 0(1)   |
| Cl(1) | 22(1) | 25(1) | 13(1)  | 1(1)   | -2(1)  | -1(1)  |
| Cl(2) | 44(1) | 46(1) | 47(1)  | -1(1)  | -12(1) | 16(1)  |
| Cl(3) | 35(1) | 35(1) | 36(1)  | -12(1) | 11(1)  | -8(1)  |
| Cl(4) | 40(1) | 77(1) | 58(1)  | -25(1) | -6(1)  | 24(1)  |
| Cl(5) | 83(1) | 39(1) | 110(1) | 18(1)  | 11(1)  | -15(1) |
| N(1)  | 11(1) | 16(1) | 16(1)  | 4(1)   | 2(1)   | 1(1)   |
| O(1)  | 11(1) | 16(1) | 13(1)  | 2(1)   | 1(1)   | 0(1)   |
| O(2)  | 12(1) | 13(1) | 11(1)  | 0(1)   | 0(1)   | -2(1)  |
| O(3)  | 11(1) | 18(1) | 20(1)  | -2(1)  | -2(1)  | -2(1)  |
| O(4)  | 12(1) | 27(1) | 17(1)  | -3(1)  | -2(1)  | 4(1)   |
| P(1)  | 10(1) | 12(1) | 11(1)  | 1(1)   | 0(1)   | -1(1)  |
| Rh(1) | 12(1) | 13(1) | 12(1)  | 0(1)   | -1(1)  | -2(1)  |

---

**Table 10.** Hydrogen coordinates ( $\times 10^4$ ) and isotropic displacement parameters ( $\text{\AA}^2 \times 10^3$ ) for **T2**.

|        | x     | y     | z     | U(eq) |
|--------|-------|-------|-------|-------|
| H(2)   | -675  | 914   | 6092  | 16    |
| H(3)   | -609  | -547  | 6916  | 15    |
| H(5)   | -2635 | 1313  | 8983  | 27    |
| H(7)   | -962  | -662  | 8823  | 22    |
| H(8)   | -2446 | -1164 | 10017 | 29    |
| H(10)  | -294  | -1615 | 5930  | 23    |
| H(11)  | 2832  | -587  | 5070  | 20    |
| H(12)  | 3832  | -1711 | 5011  | 25    |
| H(13)  | 713   | -2745 | 5859  | 29    |
| H(15)  | -1559 | 1918  | 6795  | 23    |
| H(16A) | 1074  | -1198 | 8208  | 23    |
| H(16B) | 1454  | -808  | 9423  | 23    |
| H(17A) | 4133  | -47   | 8146  | 21    |
| H(17B) | 3930  | -686  | 7203  | 21    |
| H(18A) | 4042  | -839  | 9721  | 29    |
| H(18B) | 4670  | -1359 | 8787  | 29    |
| H(19)  | -1438 | 3157  | 7300  | 30    |
| H(20)  | 702   | 2646  | 10163 | 31    |
| H(21)  | 596   | 1405  | 9654  | 22    |
| H(22)  | 2775  | -2795 | 5411  | 29    |
| H(24A) | -3468 | 787   | 4299  | 31    |
| H(24B) | -2883 | 101   | 3682  | 31    |
| H(24C) | -2039 | 735   | 4192  | 31    |
| H(25A) | -3749 | -559  | 6588  | 40    |
| H(25B) | -4092 | -671  | 5233  | 40    |
| H(25C) | -4508 | 46    | 5889  | 40    |
| H(26)  | -4094 | 807   | 10211 | 35    |
| H(27)  | -4002 | -430  | 10725 | 33    |
| H(28)  | -337  | 3521  | 9006  | 33    |
| H(29)  | -405  | -910  | 3637  | 20    |
| H(31)  | 1066  | 1070  | 4446  | 19    |

|        |      |       |      |    |
|--------|------|-------|------|----|
| H(32)  | 646  | 1461  | 2505 | 26 |
| H(33A) | 2813 | -1898 | 8216 | 30 |
| H(33B) | 2681 | -1823 | 9609 | 30 |
| H(34)  | 1451 | 1733  | 5983 | 18 |
| H(35)  | 3117 | 1112  | 5538 | 18 |
| H(36A) | 4392 | 2408  | 5546 | 25 |
| H(36B) | 4948 | 1636  | 5237 | 25 |
| H(37A) | 5796 | 1483  | 7061 | 27 |
| H(37B) | 5927 | 2339  | 6914 | 27 |
| H(38)  | 5094 | 1949  | 8840 | 23 |
| H(39)  | 3572 | 2717  | 9056 | 23 |
| H(40A) | 3890 | 3201  | 6771 | 26 |
| H(40B) | 2960 | 3536  | 7663 | 26 |
| H(41A) | 1378 | 2883  | 6908 | 24 |
| H(41B) | 2118 | 3018  | 5753 | 24 |
| H(42)  | -374 | 689   | 1158 | 28 |
| H(43)  | -873 | -503  | 1728 | 25 |
| H(45A) | 6909 | 6829  | 8137 | 49 |
| H(45B) | 6885 | 6806  | 6741 | 49 |
| H(46A) | 7038 | 4970  | 8478 | 32 |
| H(46B) | 7690 | 4691  | 7334 | 32 |

---

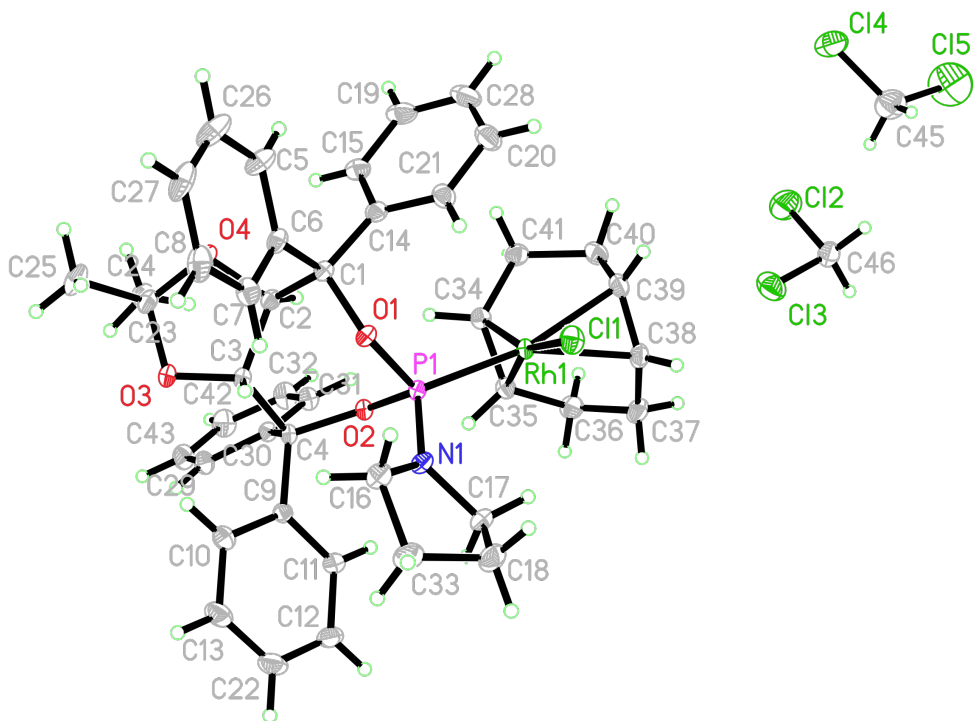



**Table 11.** Crystal data and structure refinement for **T8**.

|                                   |                                                          |                     |
|-----------------------------------|----------------------------------------------------------|---------------------|
| Identification code               | rovis73_0m                                               |                     |
| Empirical formula                 | C <sub>51</sub> H <sub>64</sub> Cl N O <sub>4</sub> P Rh |                     |
| Formula weight                    | 924.36                                                   |                     |
| Temperature                       | 120 K                                                    |                     |
| Wavelength                        | 0.71073 Å                                                |                     |
| Crystal system                    | Orthorhombic                                             |                     |
| Space group                       | P 2 <sub>1</sub> 2 <sub>1</sub> 2 <sub>1</sub>           |                     |
| Unit cell dimensions              | $a = 15.3754(4)$ Å                                       | $\alpha = 90^\circ$ |
|                                   | $b = 17.3853(4)$ Å                                       | $\beta = 90^\circ$  |
|                                   | $c = 18.1214(4)$ Å                                       | $\gamma = 90^\circ$ |
| Volume                            | 4844.0(2) Å <sup>3</sup>                                 |                     |
| Z                                 | 4                                                        |                     |
| Density (calculated)              | 1.268 Mg/m <sup>3</sup>                                  |                     |
| Absorption coefficient            | 0.483 mm <sup>-1</sup>                                   |                     |
| F(000)                            | 1944                                                     |                     |
| Crystal size                      | 0.31 x 0.26 x 0.19 mm <sup>3</sup>                       |                     |
| Theta range for data collection   | 2.10 to 36.43°.                                          |                     |
| Index ranges                      | -25 ≤ h ≤ 25, -28 ≤ k ≤ 25, -30 ≤ l ≤ 28                 |                     |
| Reflections collected             | 52621                                                    |                     |
| Independent reflections           | 23450 [R(int) = 0.0546]                                  |                     |
| Completeness to theta = 36.43°    | 99.5 %                                                   |                     |
| Absorption correction             | Multi-Scan                                               |                     |
| Max. and min. transmission        | 0.9159 and 0.8658                                        |                     |
| Refinement method                 | Full-matrix least-squares on F <sup>2</sup>              |                     |
| Data / restraints / parameters    | 23450 / 0 / 542                                          |                     |
| Goodness-of-fit on F <sup>2</sup> | 1.006                                                    |                     |
| Final R indices [I > 2σ(I)]       | R1 = 0.0532, wR2 = 0.1024                                |                     |
| R indices (all data)              | R1 = 0.0916, wR2 = 0.1182                                |                     |
| Absolute structure parameter      | -0.030(17)                                               |                     |
| Largest diff. peak and hole       | 1.864 and -0.936 e.Å <sup>-3</sup>                       |                     |

**Table 12.** Atomic coordinates ( $\times 10^4$ ) and equivalent isotropic displacement parameters ( $\text{\AA}^2 \times 10^3$ ) for **T8**.  $U(\text{eq})$  is defined as one third of the trace of the orthogonalized  $U^{ij}$  tensor.

|       | x        | y       | z        | $U(\text{eq})$ |
|-------|----------|---------|----------|----------------|
| C(1)  | 115(2)   | 5573(1) | -839(1)  | 17(1)          |
| C(2)  | 527(2)   | 4751(1) | -800(1)  | 18(1)          |
| C(3)  | 120(2)   | 4265(1) | -177(1)  | 18(1)          |
| C(4)  | 697(1)   | 4268(1) | 527(1)   | 16(1)          |
| C(5)  | 244(2)   | 3536(2) | -1257(2) | 36(1)          |
| C(6)  | -1015(2) | 5763(2) | 1276(2)  | 23(1)          |
| C(7)  | 162(2)   | 6373(2) | 1953(2)  | 26(1)          |
| C(8)  | 181(2)   | 4065(1) | 1222(1)  | 17(1)          |
| C(9)  | -527(2)  | 3559(1) | 1194(2)  | 21(1)          |
| C(10) | -943(2)  | 3322(2) | 1836(2)  | 24(1)          |
| C(11) | -654(2)  | 3611(2) | 2508(2)  | 25(1)          |
| C(12) | 33(2)    | 4131(2) | 2553(2)  | 23(1)          |
| C(13) | 453(2)   | 4344(1) | 1898(1)  | 19(1)          |
| C(14) | -1687(2) | 2759(2) | 1810(2)  | 37(1)          |
| C(15) | 327(2)   | 4463(2) | 3276(2)  | 33(1)          |
| C(16) | 1486(2)  | 3731(1) | 456(1)   | 18(1)          |
| C(17) | 1388(2)  | 2939(1) | 580(2)   | 26(1)          |
| C(18) | 2094(2)  | 2444(2) | 503(2)   | 34(1)          |
| C(19) | 3008(2)  | 3517(2) | 178(2)   | 33(1)          |
| C(20) | 2295(2)  | 4005(2) | 251(2)   | 26(1)          |
| C(21) | 721(2)   | 6148(1) | -1216(1) | 19(1)          |
| C(22) | 1323(2)  | 5918(2) | -1741(2) | 24(1)          |
| C(23) | 1814(2)  | 6454(2) | -2126(2) | 29(1)          |
| C(24) | 1704(2)  | 7238(2) | -1971(2) | 26(1)          |
| C(25) | 1103(2)  | 7481(2) | -1444(2) | 23(1)          |
| C(26) | 614(2)   | 6932(1) | -1076(1) | 20(1)          |
| C(27) | 2452(2)  | 6205(2) | -2717(2) | 45(1)          |
| C(28) | 992(2)   | 8326(2) | -1273(2) | 33(1)          |
| C(29) | -768(2)  | 5543(1) | -1231(2) | 23(1)          |
| C(30) | -1532(2) | 5450(1) | -837(2)  | 26(1)          |
| C(31) | -2339(2) | 5401(2) | -1186(2) | 35(1)          |
| C(32) | -2349(2) | 5438(2) | -1957(2) | 45(1)          |

|       |          |         |          |        |
|-------|----------|---------|----------|--------|
| C(33) | -1597(3) | 5526(2) | -2367(2) | 39(1)  |
| C(34) | -806(2)  | 5585(2) | -1996(2) | 30(1)  |
| C(35) | -3166(2) | 5342(2) | -746(2)  | 47(1)  |
| C(36) | -1622(3) | 5568(2) | -3203(2) | 60(1)  |
| C(37) | 2903(2)  | 2736(2) | 310(2)   | 34(1)  |
| C(38) | 1982(3)  | 1595(2) | 641(3)   | 60(1)  |
| C(39) | -1329(2) | 6069(2) | 2014(2)  | 39(1)  |
| C(40) | -700(2)  | 6709(2) | 2207(2)  | 39(1)  |
| C(41) | -492(4)  | 3227(3) | -1692(2) | 115(3) |
| C(42) | 1122(3)  | 3114(2) | -1364(2) | 65(1)  |
| C(43) | 3898(2)  | 3838(2) | -40(3)   | 61(1)  |
| C(44) | 2693(2)  | 6106(2) | 216(2)   | 29(1)  |
| C(45) | 2612(2)  | 6028(2) | 980(2)   | 29(1)  |
| C(46) | 3169(2)  | 6399(2) | 1571(2)  | 42(1)  |
| C(47) | 3379(2)  | 7236(2) | 1405(2)  | 37(1)  |
| C(48) | 3434(2)  | 6544(2) | -151(2)  | 45(1)  |
| C(49) | 3226(2)  | 7394(2) | -280(2)  | 32(1)  |
| C(50) | 2602(2)  | 7729(2) | 264(2)   | 26(1)  |
| C(51) | 2644(2)  | 7648(2) | 1019(2)  | 25(1)  |
| Cl(1) | 554(1)   | 7756(1) | 653(1)   | 21(1)  |
| N(1)  | -78(1)   | 5980(1) | 1258(1)  | 18(1)  |
| O(1)  | -70(1)   | 5823(1) | -90(1)   | 16(1)  |
| O(2)  | 1061(1)  | 5036(1) | 596(1)   | 15(1)  |
| O(3)  | 363(1)   | 4325(1) | -1449(1) | 23(1)  |
| O(4)  | 37(1)    | 3517(1) | -489(1)  | 23(1)  |
| P(1)  | 618(1)   | 5885(1) | 583(1)   | 14(1)  |
| Rh(1) | 1663(1)  | 6806(1) | 588(1)   | 17(1)  |

---

**Table 13.** Bond lengths [Å] and angles [°] for **T8**.

|             |          |             |            |
|-------------|----------|-------------|------------|
| C(1)-O(1)   | 1.454(3) | C(19)-C(43) | 1.531(5)   |
| C(1)-C(21)  | 1.528(3) | C(21)-C(22) | 1.387(4)   |
| C(1)-C(29)  | 1.533(3) | C(21)-C(26) | 1.396(3)   |
| C(1)-C(2)   | 1.564(3) | C(22)-C(23) | 1.387(4)   |
| C(2)-O(3)   | 1.413(3) | C(23)-C(24) | 1.403(4)   |
| C(2)-C(3)   | 1.542(3) | C(23)-C(27) | 1.516(4)   |
| C(3)-O(4)   | 1.425(3) | C(24)-C(25) | 1.393(4)   |
| C(3)-C(4)   | 1.553(3) | C(25)-C(26) | 1.387(4)   |
| C(4)-O(2)   | 1.454(3) | C(25)-C(28) | 1.510(4)   |
| C(4)-C(8)   | 1.531(3) | C(29)-C(30) | 1.384(4)   |
| C(4)-C(16)  | 1.536(3) | C(29)-C(34) | 1.389(4)   |
| C(5)-O(3)   | 1.428(3) | C(30)-C(31) | 1.397(4)   |
| C(5)-O(4)   | 1.428(3) | C(31)-C(32) | 1.399(5)   |
| C(5)-C(41)  | 1.480(5) | C(31)-C(35) | 1.504(5)   |
| C(5)-C(42)  | 1.548(5) | C(32)-C(33) | 1.383(5)   |
| C(6)-N(1)   | 1.489(3) | C(33)-C(34) | 1.393(4)   |
| C(6)-C(39)  | 1.517(4) | C(33)-C(36) | 1.516(5)   |
| C(7)-N(1)   | 1.479(3) | C(39)-C(40) | 1.514(5)   |
| C(7)-C(40)  | 1.520(4) | C(44)-C(45) | 1.395(4)   |
| C(8)-C(13)  | 1.382(3) | C(44)-C(48) | 1.524(4)   |
| C(8)-C(9)   | 1.400(3) | C(44)-Rh(1) | 2.108(3)   |
| C(9)-C(10)  | 1.391(4) | C(45)-C(46) | 1.516(4)   |
| C(10)-C(11) | 1.390(4) | C(45)-Rh(1) | 2.113(3)   |
| C(10)-C(14) | 1.507(4) | C(46)-C(47) | 1.521(4)   |
| C(11)-C(12) | 1.392(4) | C(47)-C(51) | 1.510(4)   |
| C(12)-C(13) | 1.401(4) | C(48)-C(49) | 1.530(4)   |
| C(12)-C(15) | 1.501(4) | C(49)-C(50) | 1.495(4)   |
| C(16)-C(20) | 1.384(4) | C(50)-C(51) | 1.377(4)   |
| C(16)-C(17) | 1.402(3) | C(50)-Rh(1) | 2.236(3)   |
| C(17)-C(18) | 1.392(4) | C(51)-Rh(1) | 2.242(3)   |
| C(18)-C(37) | 1.387(5) | Cl(1)-Rh(1) | 2.3765(6)  |
| C(18)-C(38) | 1.508(4) | N(1)-P(1)   | 1.633(2)   |
| C(19)-C(37) | 1.388(4) | O(1)-P(1)   | 1.6188(18) |
| C(19)-C(20) | 1.392(4) | O(2)-P(1)   | 1.6260(15) |
|             |          | P(1)-Rh(1)  | 2.2688(6)  |

|                   |            |                   |          |
|-------------------|------------|-------------------|----------|
| O(1)-C(1)-C(21)   | 109.92(19) | C(8)-C(13)-C(12)  | 121.2(2) |
| O(1)-C(1)-C(29)   | 105.58(19) | C(20)-C(16)-C(17) | 118.6(2) |
| C(21)-C(1)-C(29)  | 110.8(2)   | C(20)-C(16)-C(4)  | 121.5(2) |
| O(1)-C(1)-C(2)    | 108.03(17) | C(17)-C(16)-C(4)  | 119.9(2) |
| C(21)-C(1)-C(2)   | 111.9(2)   | C(18)-C(17)-C(16) | 120.4(3) |
| C(29)-C(1)-C(2)   | 110.39(19) | C(37)-C(18)-C(17) | 119.9(3) |
| O(3)-C(2)-C(3)    | 104.53(19) | C(37)-C(18)-C(38) | 120.1(3) |
| O(3)-C(2)-C(1)    | 111.59(19) | C(17)-C(18)-C(38) | 120.0(3) |
| C(3)-C(2)-C(1)    | 111.8(2)   | C(37)-C(19)-C(20) | 119.3(3) |
| O(4)-C(3)-C(2)    | 104.21(19) | C(37)-C(19)-C(43) | 120.3(3) |
| O(4)-C(3)-C(4)    | 112.37(19) | C(20)-C(19)-C(43) | 120.4(3) |
| C(2)-C(3)-C(4)    | 111.6(2)   | C(16)-C(20)-C(19) | 121.5(3) |
| O(2)-C(4)-C(8)    | 109.89(19) | C(22)-C(21)-C(26) | 119.1(2) |
| O(2)-C(4)-C(16)   | 105.19(17) | C(22)-C(21)-C(1)  | 121.6(2) |
| C(8)-C(4)-C(16)   | 109.82(19) | C(26)-C(21)-C(1)  | 119.1(2) |
| O(2)-C(4)-C(3)    | 107.06(17) | C(23)-C(22)-C(21) | 121.0(3) |
| C(8)-C(4)-C(3)    | 112.29(19) | C(22)-C(23)-C(24) | 119.1(3) |
| C(16)-C(4)-C(3)   | 112.31(19) | C(22)-C(23)-C(27) | 121.1(3) |
| O(3)-C(5)-O(4)    | 106.7(2)   | C(24)-C(23)-C(27) | 119.8(3) |
| O(3)-C(5)-C(41)   | 108.5(3)   | C(25)-C(24)-C(23) | 120.8(3) |
| O(4)-C(5)-C(41)   | 109.9(3)   | C(26)-C(25)-C(24) | 118.7(2) |
| O(3)-C(5)-C(42)   | 108.2(3)   | C(26)-C(25)-C(28) | 120.6(3) |
| O(4)-C(5)-C(42)   | 107.7(3)   | C(24)-C(25)-C(28) | 120.7(2) |
| C(41)-C(5)-C(42)  | 115.5(4)   | C(25)-C(26)-C(21) | 121.4(2) |
| N(1)-C(6)-C(39)   | 103.8(2)   | C(30)-C(29)-C(34) | 119.0(2) |
| N(1)-C(7)-C(40)   | 102.6(2)   | C(30)-C(29)-C(1)  | 121.1(2) |
| C(13)-C(8)-C(9)   | 119.3(2)   | C(34)-C(29)-C(1)  | 119.8(2) |
| C(13)-C(8)-C(4)   | 119.4(2)   | C(29)-C(30)-C(31) | 121.9(3) |
| C(9)-C(8)-C(4)    | 121.2(2)   | C(30)-C(31)-C(32) | 117.4(3) |
| C(10)-C(9)-C(8)   | 120.9(2)   | C(30)-C(31)-C(35) | 121.0(3) |
| C(11)-C(10)-C(9)  | 118.6(2)   | C(32)-C(31)-C(35) | 121.6(3) |
| C(11)-C(10)-C(14) | 120.4(2)   | C(33)-C(32)-C(31) | 122.2(3) |
| C(9)-C(10)-C(14)  | 121.1(2)   | C(32)-C(33)-C(34) | 118.6(3) |
| C(10)-C(11)-C(12) | 121.9(2)   | C(32)-C(33)-C(36) | 121.3(3) |
| C(11)-C(12)-C(13) | 118.2(2)   | C(34)-C(33)-C(36) | 120.1(4) |
| C(11)-C(12)-C(15) | 121.9(2)   | C(29)-C(34)-C(33) | 121.0(3) |
| C(13)-C(12)-C(15) | 119.9(3)   | C(18)-C(37)-C(19) | 120.3(3) |

|                   |            |                   |            |
|-------------------|------------|-------------------|------------|
| C(40)-C(39)-C(6)  | 105.0(2)   | O(1)-P(1)-O(2)    | 102.94(9)  |
| C(39)-C(40)-C(7)  | 101.8(2)   | O(1)-P(1)-N(1)    | 98.27(9)   |
| C(45)-C(44)-C(48) | 123.2(3)   | O(2)-P(1)-N(1)    | 110.82(10) |
| C(45)-C(44)-Rh(1) | 70.90(17)  | O(1)-P(1)-Rh(1)   | 120.87(7)  |
| C(48)-C(44)-Rh(1) | 114.36(19) | O(2)-P(1)-Rh(1)   | 110.09(6)  |
| C(44)-C(45)-C(46) | 127.6(3)   | N(1)-P(1)-Rh(1)   | 112.94(8)  |
| C(44)-C(45)-Rh(1) | 70.50(17)  | C(44)-Rh(1)-C(45) | 38.60(11)  |
| C(46)-C(45)-Rh(1) | 110.8(2)   | C(44)-Rh(1)-C(50) | 81.13(11)  |
| C(45)-C(46)-C(47) | 112.8(3)   | C(45)-Rh(1)-C(50) | 95.83(12)  |
| C(51)-C(47)-C(46) | 112.7(3)   | C(44)-Rh(1)-C(51) | 89.05(12)  |
| C(44)-C(48)-C(49) | 113.2(3)   | C(45)-Rh(1)-C(51) | 80.59(10)  |
| C(50)-C(49)-C(48) | 114.2(2)   | C(50)-Rh(1)-C(51) | 35.81(10)  |
| C(51)-C(50)-C(49) | 125.9(3)   | C(44)-Rh(1)-P(1)  | 97.06(8)   |
| C(51)-C(50)-Rh(1) | 72.33(17)  | C(45)-Rh(1)-P(1)  | 92.20(8)   |
| C(49)-C(50)-Rh(1) | 107.96(18) | C(50)-Rh(1)-P(1)  | 164.27(8)  |
| C(50)-C(51)-C(47) | 122.9(3)   | C(51)-Rh(1)-P(1)  | 159.80(8)  |
| C(50)-C(51)-Rh(1) | 71.85(17)  | C(44)-Rh(1)-Cl(1) | 162.98(9)  |
| C(47)-C(51)-Rh(1) | 110.82(18) | C(45)-Rh(1)-Cl(1) | 157.50(10) |
| C(7)-N(1)-C(6)    | 109.9(2)   | C(50)-Rh(1)-Cl(1) | 88.75(8)   |
| C(7)-N(1)-P(1)    | 121.38(18) | C(51)-Rh(1)-Cl(1) | 90.70(8)   |
| C(6)-N(1)-P(1)    | 128.62(18) | P(1)-Rh(1)-Cl(1)  | 88.970(19) |
| C(1)-O(1)-P(1)    | 126.59(15) |                   |            |
| C(4)-O(2)-P(1)    | 132.18(13) |                   |            |
| C(2)-O(3)-C(5)    | 108.87(19) |                   |            |
| C(3)-O(4)-C(5)    | 110.29(19) |                   |            |

---

Symmetry transformations used to generate equivalent atoms:

**Table 14.** Anisotropic displacement parameters ( $\text{\AA}^2 \times 10^3$ ) for **T8**. The anisotropic displacement factor exponent takes the form:  $-2p^2 [ h^2 a^{*2} U^{11} + \dots + 2 h k a^* b^* U^{12} ]$

|       | $U^{11}$ | $U^{22}$ | $U^{33}$ | $U^{23}$ | $U^{13}$ | $U^{12}$ |
|-------|----------|----------|----------|----------|----------|----------|
| C(1)  | 19(1)    | 16(1)    | 16(1)    | 2(1)     | -2(1)    | 2(1)     |
| C(2)  | 20(1)    | 18(1)    | 15(1)    | 1(1)     | -1(1)    | 0(1)     |
| C(3)  | 21(1)    | 15(1)    | 18(1)    | 0(1)     | -2(1)    | -2(1)    |
| C(4)  | 19(1)    | 12(1)    | 16(1)    | 1(1)     | 0(1)     | -2(1)    |
| C(5)  | 62(2)    | 27(2)    | 20(1)    | -5(1)    | 5(1)     | -14(1)   |
| C(6)  | 17(1)    | 20(1)    | 33(1)    | 3(1)     | 4(1)     | 0(1)     |
| C(7)  | 28(1)    | 28(1)    | 20(1)    | -2(1)    | 4(1)     | -3(1)    |
| C(8)  | 17(1)    | 15(1)    | 20(1)    | 4(1)     | 1(1)     | 1(1)     |
| C(9)  | 24(1)    | 19(1)    | 21(1)    | 2(1)     | -2(1)    | -3(1)    |
| C(10) | 22(1)    | 24(1)    | 27(1)    | 5(1)     | 1(1)     | -3(1)    |
| C(11) | 25(1)    | 24(1)    | 24(1)    | 11(1)    | 3(1)     | 0(1)     |
| C(12) | 25(1)    | 26(1)    | 18(1)    | 5(1)     | 1(1)     | 1(1)     |
| C(13) | 19(1)    | 19(1)    | 18(1)    | 3(1)     | 0(1)     | -1(1)    |
| C(14) | 34(2)    | 39(2)    | 37(2)    | 9(1)     | 3(2)     | -14(2)   |
| C(15) | 38(2)    | 41(2)    | 18(1)    | 3(1)     | 0(1)     | -8(1)    |
| C(16) | 22(1)    | 18(1)    | 15(1)    | -1(1)    | -2(1)    | 1(1)     |
| C(17) | 30(1)    | 17(1)    | 29(1)    | 2(1)     | 2(1)     | 2(1)     |
| C(18) | 41(2)    | 20(1)    | 42(2)    | 2(1)     | 8(2)     | 8(1)     |
| C(19) | 22(1)    | 31(2)    | 45(2)    | 1(1)     | 5(1)     | 8(1)     |
| C(20) | 26(1)    | 19(1)    | 34(2)    | 1(1)     | 2(1)     | 3(1)     |
| C(21) | 21(1)    | 21(1)    | 15(1)    | 4(1)     | -1(1)    | 2(1)     |
| C(22) | 27(1)    | 25(1)    | 19(1)    | 5(1)     | 2(1)     | 6(1)     |
| C(23) | 30(2)    | 35(2)    | 21(1)    | 6(1)     | 8(1)     | 5(1)     |
| C(24) | 27(1)    | 26(1)    | 26(1)    | 12(1)    | 1(1)     | 0(1)     |
| C(25) | 26(1)    | 24(1)    | 20(1)    | 4(1)     | -4(1)    | 0(1)     |
| C(26) | 22(1)    | 21(1)    | 16(1)    | 3(1)     | 0(1)     | 2(1)     |
| C(27) | 47(2)    | 48(2)    | 39(2)    | 11(2)    | 25(2)    | 15(2)    |
| C(28) | 44(2)    | 23(2)    | 33(2)    | 7(1)     | -1(1)    | -6(1)    |
| C(29) | 25(1)    | 15(1)    | 28(1)    | 0(1)     | -10(1)   | 2(1)     |
| C(30) | 20(1)    | 18(1)    | 39(2)    | 0(1)     | -8(1)    | -1(1)    |
| C(31) | 25(1)    | 12(1)    | 66(2)    | -5(1)    | -16(1)   | 3(1)     |
| C(32) | 41(2)    | 22(1)    | 72(3)    | -13(2)   | -38(2)   | 9(1)     |

|       |        |        |        |       |        |         |
|-------|--------|--------|--------|-------|--------|---------|
| C(33) | 53(2)  | 25(1)  | 39(2)  | -8(1) | -25(2) | 8(2)    |
| C(34) | 36(2)  | 24(1)  | 30(2)  | -2(1) | -14(1) | 2(1)    |
| C(35) | 22(1)  | 20(1)  | 100(3) | 1(2)  | -20(2) | -4(1)   |
| C(36) | 83(3)  | 55(2)  | 41(2)  | -8(2) | -39(2) | 12(2)   |
| C(37) | 39(2)  | 26(1)  | 38(2)  | -5(1) | 2(1)   | 14(1)   |
| C(38) | 62(2)  | 21(1)  | 97(3)  | 7(2)  | 15(3)  | 12(2)   |
| C(39) | 31(2)  | 45(2)  | 39(2)  | -7(2) | 19(1)  | -6(1)   |
| C(40) | 42(2)  | 42(2)  | 35(2)  | -6(2) | 12(1)  | 4(2)    |
| C(41) | 175(6) | 133(5) | 37(2)  | 36(3) | -47(3) | -126(5) |
| C(42) | 111(4) | 35(2)  | 48(2)  | 8(2)  | 32(2)  | 29(2)   |
| C(43) | 28(2)  | 46(2)  | 109(4) | 2(2)  | 22(2)  | 6(2)    |
| C(44) | 21(1)  | 18(1)  | 46(2)  | -2(1) | 10(1)  | 1(1)    |
| C(45) | 20(1)  | 18(1)  | 49(2)  | 4(1)  | -11(1) | -1(1)   |
| C(46) | 35(2)  | 33(2)  | 58(2)  | 7(2)  | -18(2) | -6(1)   |
| C(47) | 36(2)  | 30(1)  | 46(2)  | 4(1)  | -17(2) | -11(1)  |
| C(48) | 30(2)  | 32(2)  | 72(2)  | -4(2) | 28(2)  | -2(1)   |
| C(49) | 29(2)  | 30(1)  | 37(2)  | 3(1)  | 9(1)   | -6(1)   |
| C(50) | 22(1)  | 16(1)  | 40(2)  | 3(1)  | 6(1)   | -7(1)   |
| C(51) | 24(1)  | 19(1)  | 31(2)  | -2(1) | -2(1)  | -6(1)   |
| Cl(1) | 21(1)  | 17(1)  | 25(1)  | -2(1) | 1(1)   | 2(1)    |
| N(1)  | 18(1)  | 20(1)  | 17(1)  | -2(1) | 4(1)   | -1(1)   |
| O(1)  | 16(1)  | 17(1)  | 15(1)  | 0(1)  | 0(1)   | 1(1)    |
| O(2)  | 16(1)  | 12(1)  | 18(1)  | 2(1)  | 1(1)   | -1(1)   |
| O(3)  | 37(1)  | 17(1)  | 15(1)  | -2(1) | -4(1)  | 4(1)    |
| O(4)  | 34(1)  | 16(1)  | 20(1)  | -1(1) | -5(1)  | -3(1)   |
| P(1)  | 14(1)  | 13(1)  | 15(1)  | 1(1)  | 1(1)   | 0(1)    |
| Rh(1) | 15(1)  | 14(1)  | 21(1)  | 0(1)  | 1(1)   | -1(1)   |

---



**Table 15.** Hydrogen coordinates ( $\times 10^4$ ) and isotropic displacement parameters ( $\text{\AA}^2 \times 10^3$ ) for **T8**.

|        | x     | y    | z     | U(eq) |
|--------|-------|------|-------|-------|
| H(2)   | 1155  | 4794 | -721  | 21    |
| H(3)   | -458  | 4467 | -56   | 21    |
| H(6A)  | -1085 | 5210 | 1248  | 28    |
| H(6B)  | -1329 | 6000 | 872   | 28    |
| H(7A)  | 588   | 6774 | 1866  | 31    |
| H(7B)  | 392   | 6012 | 2312  | 31    |
| H(9)   | -721  | 3379 | 740   | 25    |
| H(11)  | -927  | 3453 | 2940  | 30    |
| H(13)  | 923   | 4680 | 1918  | 22    |
| H(14A) | -1467 | 2245 | 1859  | 55    |
| H(14B) | -1986 | 2808 | 1347  | 55    |
| H(14C) | -2084 | 2865 | 2207  | 55    |
| H(15A) | 65    | 4958 | 3345  | 49    |
| H(15B) | 949   | 4515 | 3274  | 49    |
| H(15C) | 156   | 4126 | 3670  | 49    |
| H(17)  | 848   | 2744 | 715   | 31    |
| H(20)  | 2365  | 4528 | 160   | 32    |
| H(22)  | 1399  | 5397 | -1837 | 29    |
| H(24)  | 2035  | 7601 | -2223 | 32    |
| H(26)  | 205   | 7089 | -729  | 24    |
| H(27A) | 2459  | 5653 | -2748 | 68    |
| H(27B) | 3023  | 6387 | -2594 | 68    |
| H(27C) | 2278  | 6416 | -3184 | 68    |
| H(28A) | 541   | 8536 | -1579 | 50    |
| H(28B) | 1528  | 8591 | -1368 | 50    |
| H(28C) | 837   | 8387 | -763  | 50    |
| H(30)  | -1506 | 5421 | -325  | 31    |
| H(32)  | -2879 | 5401 | -2203 | 54    |
| H(34)  | -296  | 5654 | -2264 | 36    |
| H(35A) | -3464 | 5827 | -757  | 71    |
| H(35B) | -3030 | 5209 | -245  | 71    |

|        |       |      |       |     |
|--------|-------|------|-------|-----|
| H(35C) | -3532 | 4951 | -956  | 71  |
| H(36A) | -1422 | 6065 | -3361 | 90  |
| H(36B) | -2208 | 5490 | -3370 | 90  |
| H(36C) | -1253 | 5177 | -3406 | 90  |
| H(37)  | 3376  | 2406 | 269   | 41  |
| H(38A) | 2423  | 1315 | 379   | 90  |
| H(38B) | 1418  | 1435 | 473   | 90  |
| H(38C) | 2035  | 1493 | 1160  | 90  |
| H(39A) | -1917 | 6265 | 1974  | 46  |
| H(39B) | -1316 | 5668 | 2386  | 46  |
| H(40A) | -698  | 6811 | 2733  | 47  |
| H(40B) | -838  | 7179 | 1944  | 47  |
| H(41A) | -986  | 3561 | -1639 | 172 |
| H(41B) | -639  | 2723 | -1516 | 172 |
| H(41C) | -330  | 3198 | -2203 | 172 |
| H(42A) | 1273  | 3111 | -1878 | 97  |
| H(42B) | 1072  | 2595 | -1189 | 97  |
| H(42C) | 1567  | 3376 | -1090 | 97  |
| H(43A) | 3937  | 3871 | -568  | 91  |
| H(43B) | 4347  | 3503 | 142   | 91  |
| H(43C) | 3970  | 4341 | 170   | 91  |
| H(44)  | 2501  | 5652 | -61   | 34  |
| H(45)  | 2369  | 5531 | 1130  | 34  |
| H(46A) | 3708  | 6113 | 1618  | 50  |
| H(46B) | 2867  | 6369 | 2040  | 50  |
| H(47A) | 3509  | 7500 | 1864  | 45  |
| H(47B) | 3895  | 7259 | 1097  | 45  |
| H(48A) | 3566  | 6303 | -621  | 53  |
| H(48B) | 3948  | 6505 | 157   | 53  |
| H(49A) | 3764  | 7685 | -262  | 38  |
| H(49B) | 2986  | 7452 | -772  | 38  |
| H(50)  | 2326  | 8207 | 100   | 31  |
| H(51)  | 2396  | 8078 | 1298  | 30  |

---

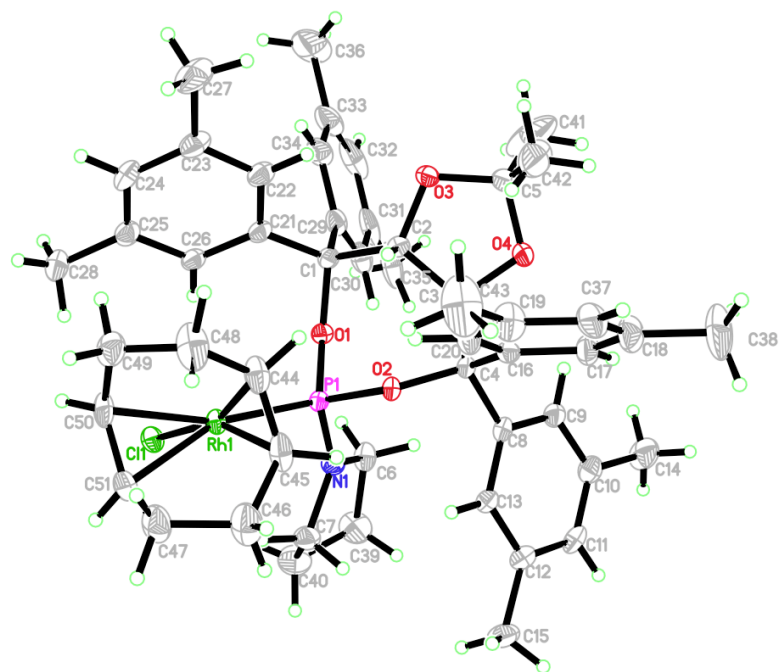

**Table 16.** Crystal data and structure refinement for **T9**.

|                                   |                                                          |                     |
|-----------------------------------|----------------------------------------------------------|---------------------|
| Identification code               | rovis36_0m                                               |                     |
| Empirical formula                 | C <sub>52</sub> H <sub>66</sub> Cl N O <sub>4</sub> P Rh |                     |
| Formula weight                    | 938.39                                                   |                     |
| Temperature                       | 120 K                                                    |                     |
| Wavelength                        | 0.71073 Å                                                |                     |
| Crystal system                    | Orthorhombic                                             |                     |
| Space group                       | P 2 <sub>1</sub> 2 <sub>1</sub> 2 <sub>1</sub>           |                     |
| Unit cell dimensions              | $a = 15.3932(6)$ Å                                       | $\alpha = 90^\circ$ |
|                                   | $b = 17.5850(7)$ Å                                       | $\beta = 90^\circ$  |
|                                   | $c = 18.0197(8)$ Å                                       | $\gamma = 90^\circ$ |
| Volume                            | 4877.7(3) Å <sup>3</sup>                                 |                     |
| Z                                 | 4                                                        |                     |
| Density (calculated)              | 1.278 Mg/m <sup>3</sup>                                  |                     |
| Absorption coefficient            | 0.481 mm <sup>-1</sup>                                   |                     |
| F(000)                            | 1976                                                     |                     |
| Crystal size                      | 0.63 x 0.45 x 0.30 mm <sup>3</sup>                       |                     |
| Theta range for data collection   | 2.09 to 33.49°.                                          |                     |
| Index ranges                      | -21 ≤ h ≤ 23, -26 ≤ k ≤ 27, -27 ≤ l ≤ 27                 |                     |
| Reflections collected             | 138707                                                   |                     |
| Independent reflections           | 18942 [R(int) = 0.0541]                                  |                     |
| Completeness to theta = 33.49°    | 99.3 %                                                   |                     |
| Absorption correction             | Multi-scan                                               |                     |
| Max. and min. transmission        | 0.8683 and 0.7527                                        |                     |
| Refinement method                 | Full-matrix least-squares on F <sup>2</sup>              |                     |
| Data / restraints / parameters    | 18942 / 0 / 568                                          |                     |
| Goodness-of-fit on F <sup>2</sup> | 1.029                                                    |                     |
| Final R indices [I > 2σ(I)]       | R1 = 0.0333, wR2 = 0.0761                                |                     |
| R indices (all data)              | R1 = 0.0434, wR2 = 0.0811                                |                     |
| Absolute structure parameter      | -0.014(12)                                               |                     |
| Largest diff. peak and hole       | 0.709 and -0.589 e.Å <sup>-3</sup>                       |                     |

**Table 17.** Atomic coordinates ( $\times 10^4$ ) and equivalent isotropic displacement parameters ( $\text{\AA}^2 \times 10^3$ ) for **T9**.  $U(\text{eq})$  is defined as one third of the trace of the orthogonalized  $U^{ij}$  tensor.

|       | x        | y       | z       | U(eq) |
|-------|----------|---------|---------|-------|
| C(1)  | 158(1)   | 6132(1) | 2978(1) | 23(1) |
| C(2)  | -1028(1) | 5493(1) | 3623(1) | 21(1) |
| C(3)  | -1684(1) | 6058(1) | 3313(1) | 27(1) |
| C(4)  | 19(1)    | 5558(1) | 5821(1) | 16(1) |
| C(5)  | 421(1)   | 4739(1) | 5820(1) | 18(1) |
| C(6)  | 21(1)    | 4233(1) | 5219(1) | 19(1) |
| C(7)  | 611(1)   | 4193(1) | 4521(1) | 18(1) |
| C(8)  | -607(1)  | 3502(1) | 3843(1) | 21(1) |
| C(9)  | 132(1)   | 3957(1) | 3823(1) | 18(1) |
| C(10) | 478(1)   | 4166(1) | 3141(1) | 21(1) |
| C(11) | 91(1)    | 3940(1) | 2479(1) | 24(1) |
| C(12) | -642(1)  | 3476(1) | 2513(1) | 25(1) |
| C(13) | 1388(1)  | 3654(1) | 4632(1) | 21(1) |
| C(14) | 1257(2)  | 2867(1) | 4593(1) | 28(1) |
| C(15) | -1641(1) | 5510(1) | 5821(1) | 20(1) |
| C(16) | -862(1)  | 5565(1) | 6212(1) | 19(1) |
| C(17) | -886(1)  | 5604(1) | 6988(1) | 24(1) |
| C(18) | -1677(1) | 5578(1) | 7366(1) | 28(1) |
| C(19) | -2443(1) | 5508(1) | 6967(1) | 28(1) |
| C(20) | -109(2)  | 3614(1) | 6349(1) | 27(1) |
| C(21) | -1385(1) | 6359(1) | 2565(1) | 30(1) |
| C(22) | -484(1)  | 6708(1) | 2635(1) | 29(1) |
| C(23) | -998(1)  | 3249(1) | 3187(1) | 24(1) |
| C(24) | 2222(1)  | 3923(1) | 4747(1) | 31(1) |
| C(25) | 1953(2)  | 2366(1) | 4665(1) | 34(1) |
| C(26) | -1056(2) | 3632(1) | 6604(1) | 35(1) |
| C(27) | 2780(2)  | 2655(1) | 4770(1) | 39(1) |
| C(28) | 2926(2)  | 3425(2) | 4811(2) | 40(1) |
| C(29) | -1774(2) | 2728(1) | 3200(1) | 38(1) |
| C(30) | 461(2)   | 4190(2) | 1744(1) | 40(1) |
| C(31) | -3277(1) | 5440(1) | 5767(1) | 32(1) |
| C(32) | -2438(1) | 5479(1) | 6191(1) | 24(1) |

|       |          |         |         |       |
|-------|----------|---------|---------|-------|
| C(33) | -1677(2) | 5626(2) | 8209(1) | 42(1) |
| C(34) | 809(1)   | 8301(1) | 6194(1) | 28(1) |
| C(35) | 476(1)   | 6908(1) | 6024(1) | 18(1) |
| C(36) | 618(1)   | 6146(1) | 6179(1) | 17(1) |
| C(37) | 1238(1)  | 5939(1) | 6703(1) | 23(1) |
| C(38) | 1715(1)  | 6499(1) | 7071(1) | 27(1) |
| C(39) | 961(1)   | 7474(1) | 6375(1) | 21(1) |
| C(40) | 2502(1)  | 7599(1) | 4709(1) | 26(1) |
| C(41) | 2551(1)  | 7548(1) | 3949(1) | 25(1) |
| C(42) | 3277(1)  | 7164(1) | 3529(1) | 31(1) |
| C(43) | 3057(1)  | 6337(1) | 3336(1) | 29(1) |
| C(44) | 2499(1)  | 5939(1) | 3906(1) | 22(1) |
| C(45) | 2610(1)  | 5999(1) | 4683(1) | 24(1) |
| C(46) | 3361(1)  | 6420(1) | 5043(1) | 32(1) |
| C(47) | 3122(1)  | 7238(1) | 5252(1) | 32(1) |
| C(48) | 1795(2)  | 1517(1) | 4634(2) | 48(1) |
| C(49) | 2356(2)  | 6278(2) | 7672(2) | 45(1) |
| C(50) | 3840(2)  | 3741(2) | 4927(3) | 74(1) |
| C(51) | 411(2)   | 3000(1) | 6718(1) | 41(1) |
| C(52) | 1574(1)  | 7256(1) | 6899(1) | 25(1) |
| Cl(1) | 456(1)   | 7628(1) | 4288(1) | 21(1) |
| N(1)  | -162(1)  | 5843(1) | 3678(1) | 18(1) |
| O(1)  | -162(1)  | 5763(1) | 5051(1) | 16(1) |
| O(2)  | 981(1)   | 4949(1) | 4424(1) | 17(1) |
| O(3)  | 275(1)   | 4342(1) | 6495(1) | 23(1) |
| O(4)  | -65(1)   | 3509(1) | 5563(1) | 24(1) |
| P(1)  | 527(1)   | 5784(1) | 4376(1) | 14(1) |
| Rh(1) | 1566(1)  | 6700(1) | 4344(1) | 16(1) |

---

**Table 18.** Bond lengths [Å] and angles [°] for **T9**.

|             |            |             |            |
|-------------|------------|-------------|------------|
| C(1)-N(1)   | 1.447(2)   | C(20)-O(3)  | 1.433(2)   |
| C(1)-C(22)  | 1.545(3)   | C(20)-C(51) | 1.499(3)   |
| C(2)-N(1)   | 1.471(2)   | C(20)-C(26) | 1.529(3)   |
| C(2)-C(3)   | 1.523(3)   | C(21)-C(22) | 1.523(3)   |
| C(3)-C(21)  | 1.519(3)   | C(23)-C(29) | 1.507(3)   |
| C(4)-O(1)   | 1.4606(19) | C(24)-C(28) | 1.398(3)   |
| C(4)-C(36)  | 1.528(2)   | C(25)-C(27) | 1.384(4)   |
| C(4)-C(16)  | 1.529(2)   | C(25)-C(48) | 1.515(3)   |
| C(4)-C(5)   | 1.567(2)   | C(27)-C(28) | 1.375(4)   |
| C(5)-O(3)   | 1.421(2)   | C(28)-C(50) | 1.526(4)   |
| C(5)-C(6)   | 1.531(2)   | C(31)-C(32) | 1.502(3)   |
| C(6)-O(4)   | 1.421(2)   | C(34)-C(39) | 1.508(3)   |
| C(6)-C(7)   | 1.553(2)   | C(35)-C(36) | 1.387(3)   |
| C(7)-O(2)   | 1.458(2)   | C(35)-C(39) | 1.396(2)   |
| C(7)-C(9)   | 1.516(2)   | C(36)-C(37) | 1.390(2)   |
| C(7)-C(13)  | 1.539(2)   | C(37)-C(38) | 1.397(3)   |
| C(8)-C(9)   | 1.391(3)   | C(38)-C(52) | 1.384(3)   |
| C(8)-C(23)  | 1.398(2)   | C(38)-C(49) | 1.517(3)   |
| C(9)-C(10)  | 1.389(2)   | C(39)-C(52) | 1.389(3)   |
| C(10)-C(11) | 1.391(3)   | C(40)-C(41) | 1.374(3)   |
| C(11)-C(12) | 1.394(3)   | C(40)-C(47) | 1.506(3)   |
| C(11)-C(30) | 1.507(3)   | C(40)-Rh(1) | 2.2373(19) |
| C(12)-C(23) | 1.392(3)   | C(41)-C(42) | 1.510(3)   |
| C(13)-C(24) | 1.384(3)   | C(41)-Rh(1) | 2.2430(19) |
| C(13)-C(14) | 1.400(3)   | C(42)-C(43) | 1.533(3)   |
| C(14)-C(25) | 1.393(3)   | C(43)-C(44) | 1.510(3)   |
| C(15)-C(16) | 1.393(2)   | C(44)-C(45) | 1.413(3)   |
| C(15)-C(32) | 1.397(3)   | C(44)-Rh(1) | 2.1155(19) |
| C(16)-C(17) | 1.400(3)   | C(45)-C(46) | 1.519(3)   |
| C(17)-C(18) | 1.397(3)   | C(45)-Rh(1) | 2.1152(19) |
| C(18)-C(19) | 1.388(3)   | C(46)-C(47) | 1.532(3)   |
| C(18)-C(33) | 1.520(3)   | Cl(1)-Rh(1) | 2.3654(4)  |
| C(19)-C(32) | 1.401(3)   | N(1)-P(1)   | 1.6477(15) |
| C(20)-O(4)  | 1.431(2)   | O(1)-P(1)   | 1.6149(13) |
|             |            | O(2)-P(1)   | 1.6283(12) |
|             |            | P(1)-Rh(1)  | 2.2703(4)  |

|                   |            |                   |            |
|-------------------|------------|-------------------|------------|
|                   |            | C(15)-C(16)-C(4)  | 122.06(15) |
| N(1)-C(1)-C(22)   | 111.20(15) | C(17)-C(16)-C(4)  | 118.87(16) |
| N(1)-C(2)-C(3)    | 110.65(15) | C(18)-C(17)-C(16) | 120.60(18) |
| C(21)-C(3)-C(2)   | 110.61(16) | C(19)-C(18)-C(17) | 119.41(17) |
| O(1)-C(4)-C(36)   | 110.47(13) | C(19)-C(18)-C(33) | 121.51(19) |
| O(1)-C(4)-C(16)   | 105.39(13) | C(17)-C(18)-C(33) | 119.1(2)   |
| C(36)-C(4)-C(16)  | 109.64(13) | C(18)-C(19)-C(32) | 121.05(18) |
| O(1)-C(4)-C(5)    | 107.50(12) | O(4)-C(20)-O(3)   | 106.10(15) |
| C(36)-C(4)-C(5)   | 112.59(14) | O(4)-C(20)-C(51)  | 108.68(18) |
| C(16)-C(4)-C(5)   | 110.99(14) | O(3)-C(20)-C(51)  | 109.99(18) |
| O(3)-C(5)-C(6)    | 104.78(13) | O(4)-C(20)-C(26)  | 110.15(17) |
| O(3)-C(5)-C(4)    | 112.89(13) | O(3)-C(20)-C(26)  | 108.71(17) |
| C(6)-C(5)-C(4)    | 112.15(14) | C(51)-C(20)-C(26) | 112.99(19) |
| O(4)-C(6)-C(5)    | 104.52(13) | C(3)-C(21)-C(22)  | 110.09(16) |
| O(4)-C(6)-C(7)    | 111.47(14) | C(21)-C(22)-C(1)  | 110.59(17) |
| C(5)-C(6)-C(7)    | 111.30(14) | C(12)-C(23)-C(8)  | 118.50(17) |
| O(2)-C(7)-C(9)    | 109.83(13) | C(12)-C(23)-C(29) | 119.99(17) |
| O(2)-C(7)-C(13)   | 105.88(14) | C(8)-C(23)-C(29)  | 121.49(17) |
| C(9)-C(7)-C(13)   | 108.47(13) | C(13)-C(24)-C(28) | 121.2(2)   |
| O(2)-C(7)-C(6)    | 106.56(13) | C(27)-C(25)-C(14) | 119.2(2)   |
| C(9)-C(7)-C(6)    | 113.60(14) | C(27)-C(25)-C(48) | 121.0(2)   |
| C(13)-C(7)-C(6)   | 112.20(14) | C(14)-C(25)-C(48) | 119.8(2)   |
| C(9)-C(8)-C(23)   | 120.88(17) | C(28)-C(27)-C(25) | 121.3(2)   |
| C(10)-C(9)-C(8)   | 119.25(16) | C(27)-C(28)-C(24) | 119.0(2)   |
| C(10)-C(9)-C(7)   | 118.42(16) | C(27)-C(28)-C(50) | 121.1(2)   |
| C(8)-C(9)-C(7)    | 122.22(16) | C(24)-C(28)-C(50) | 119.8(2)   |
| C(9)-C(10)-C(11)  | 121.24(17) | C(15)-C(32)-C(19) | 118.71(18) |
| C(10)-C(11)-C(12) | 118.50(17) | C(15)-C(32)-C(31) | 120.98(18) |
| C(10)-C(11)-C(30) | 120.56(18) | C(19)-C(32)-C(31) | 120.28(18) |
| C(12)-C(11)-C(30) | 120.93(17) | C(36)-C(35)-C(39) | 120.92(16) |
| C(23)-C(12)-C(11) | 121.60(17) | C(35)-C(36)-C(37) | 119.84(16) |
| C(24)-C(13)-C(14) | 118.63(18) | C(35)-C(36)-C(4)  | 118.26(15) |
| C(24)-C(13)-C(7)  | 122.01(16) | C(37)-C(36)-C(4)  | 121.60(16) |
| C(14)-C(13)-C(7)  | 119.33(18) | C(36)-C(37)-C(38) | 119.96(18) |
| C(25)-C(14)-C(13) | 120.6(2)   | C(52)-C(38)-C(37) | 119.33(18) |
| C(16)-C(15)-C(32) | 121.17(16) | C(52)-C(38)-C(49) | 120.58(18) |
| C(15)-C(16)-C(17) | 119.04(16) | C(37)-C(38)-C(49) | 120.1(2)   |



|                   |            |                   |            |
|-------------------|------------|-------------------|------------|
| C(52)-C(39)-C(35) | 118.33(17) | C(6)-O(4)-C(20)   | 108.63(13) |
| C(52)-C(39)-C(34) | 121.26(16) | O(1)-P(1)-O(2)    | 102.74(6)  |
| C(35)-C(39)-C(34) | 120.40(17) | O(1)-P(1)-N(1)    | 98.83(6)   |
| C(41)-C(40)-C(47) | 125.9(2)   | O(2)-P(1)-N(1)    | 111.92(7)  |
| C(41)-C(40)-Rh(1) | 72.37(13)  | O(1)-P(1)-Rh(1)   | 119.87(5)  |
| C(47)-C(40)-Rh(1) | 107.56(14) | O(2)-P(1)-Rh(1)   | 109.79(4)  |
| C(40)-C(41)-C(42) | 124.6(2)   | N(1)-P(1)-Rh(1)   | 112.95(6)  |
| C(40)-C(41)-Rh(1) | 71.91(12)  | C(45)-Rh(1)-C(44) | 39.03(7)   |
| C(42)-C(41)-Rh(1) | 111.17(14) | C(45)-Rh(1)-C(40) | 80.67(8)   |
| C(41)-C(42)-C(43) | 112.04(17) | C(44)-Rh(1)-C(40) | 96.82(8)   |
| C(44)-C(43)-C(42) | 114.17(17) | C(45)-Rh(1)-C(41) | 88.06(8)   |
| C(45)-C(44)-C(43) | 124.86(19) | C(44)-Rh(1)-C(41) | 80.98(7)   |
| C(45)-C(44)-Rh(1) | 70.48(12)  | C(40)-Rh(1)-C(41) | 35.72(7)   |
| C(43)-C(44)-Rh(1) | 110.32(13) | C(45)-Rh(1)-P(1)  | 96.58(6)   |
| C(44)-C(45)-C(46) | 123.42(19) | C(44)-Rh(1)-P(1)  | 92.26(6)   |
| C(44)-C(45)-Rh(1) | 70.50(12)  | C(40)-Rh(1)-P(1)  | 161.33(6)  |
| C(46)-C(45)-Rh(1) | 114.63(14) | C(41)-Rh(1)-P(1)  | 162.90(6)  |
| C(45)-C(46)-C(47) | 112.35(17) | C(45)-Rh(1)-Cl(1) | 164.48(6)  |
| C(40)-C(47)-C(46) | 112.80(17) | C(44)-Rh(1)-Cl(1) | 155.62(6)  |
| C(38)-C(52)-C(39) | 121.59(17) | C(40)-Rh(1)-Cl(1) | 89.47(6)   |
| C(1)-N(1)-C(2)    | 113.37(14) | C(41)-Rh(1)-Cl(1) | 90.90(6)   |
| C(1)-N(1)-P(1)    | 117.90(12) | P(1)-Rh(1)-Cl(1)  | 88.919(14) |
| C(2)-N(1)-P(1)    | 127.45(12) |                   |            |
| C(4)-O(1)-P(1)    | 126.59(10) |                   |            |
| C(7)-O(2)-P(1)    | 131.43(10) |                   |            |
| C(5)-O(3)-C(20)   | 110.34(13) |                   |            |

---

Symmetry transformations used to generate equivalent atoms:

**Table 19.** Anisotropic displacement parameters ( $\text{\AA}^2 \times 10^3$ ) for **T9**. The anisotropic displacement factor exponent takes the form:  $-2p^2 [ h^2 a^{*2} U^{11} + \dots + 2 h k a^* b^* U^{12} ]$

|       | U <sup>11</sup> | U <sup>22</sup> | U <sup>33</sup> | U <sup>23</sup> | U <sup>13</sup> | U <sup>12</sup> |
|-------|-----------------|-----------------|-----------------|-----------------|-----------------|-----------------|
| C(1)  | 18(1)           | 27(1)           | 25(1)           | -3(1)           | 0(1)            | -3(1)           |
| C(2)  | 16(1)           | 23(1)           | 23(1)           | -4(1)           | -2(1)           | -2(1)           |
| C(3)  | 19(1)           | 29(1)           | 34(1)           | -9(1)           | -6(1)           | 5(1)            |
| C(4)  | 18(1)           | 18(1)           | 14(1)           | -1(1)           | 0(1)            | 1(1)            |
| C(5)  | 22(1)           | 17(1)           | 16(1)           | -1(1)           | 0(1)            | 1(1)            |
| C(6)  | 22(1)           | 16(1)           | 18(1)           | 0(1)            | 1(1)            | -1(1)           |
| C(7)  | 20(1)           | 14(1)           | 19(1)           | -1(1)           | -1(1)           | 1(1)            |
| C(8)  | 25(1)           | 18(1)           | 21(1)           | -2(1)           | 1(1)            | -2(1)           |
| C(9)  | 20(1)           | 16(1)           | 17(1)           | -3(1)           | 0(1)            | 3(1)            |
| C(10) | 21(1)           | 24(1)           | 19(1)           | -4(1)           | 2(1)            | 2(1)            |
| C(11) | 24(1)           | 28(1)           | 19(1)           | -7(1)           | 2(1)            | 3(1)            |
| C(12) | 27(1)           | 27(1)           | 22(1)           | -7(1)           | -3(1)           | 0(1)            |
| C(13) | 28(1)           | 19(1)           | 18(1)           | -1(1)           | -1(1)           | 7(1)            |
| C(14) | 37(1)           | 19(1)           | 27(1)           | -1(1)           | -2(1)           | 7(1)            |
| C(15) | 22(1)           | 17(1)           | 23(1)           | -1(1)           | 2(1)            | 0(1)            |
| C(16) | 20(1)           | 16(1)           | 21(1)           | -1(1)           | 4(1)            | 0(1)            |
| C(17) | 24(1)           | 26(1)           | 22(1)           | -2(1)           | 3(1)            | -2(1)           |
| C(18) | 33(1)           | 25(1)           | 26(1)           | -2(1)           | 11(1)           | -3(1)           |
| C(19) | 26(1)           | 23(1)           | 35(1)           | 1(1)            | 13(1)           | 0(1)            |
| C(20) | 41(1)           | 20(1)           | 20(1)           | 3(1)            | -4(1)           | -2(1)           |
| C(21) | 29(1)           | 28(1)           | 32(1)           | -2(1)           | -13(1)          | 5(1)            |
| C(22) | 35(1)           | 26(1)           | 26(1)           | 3(1)            | -10(1)          | -1(1)           |
| C(23) | 26(1)           | 22(1)           | 25(1)           | -5(1)           | -2(1)           | -2(1)           |
| C(24) | 25(1)           | 26(1)           | 41(1)           | -1(1)           | -5(1)           | 7(1)            |
| C(25) | 50(1)           | 23(1)           | 28(1)           | 0(1)            | -3(1)           | 14(1)           |
| C(26) | 41(1)           | 35(1)           | 29(1)           | 3(1)            | 6(1)            | -7(1)           |
| C(27) | 46(1)           | 36(1)           | 35(1)           | 0(1)            | -6(1)           | 23(1)           |
| C(28) | 29(1)           | 40(1)           | 52(1)           | 1(1)            | -8(1)           | 13(1)           |
| C(29) | 42(1)           | 40(1)           | 33(1)           | -6(1)           | -2(1)           | -16(1)          |
| C(30) | 38(1)           | 61(2)           | 19(1)           | -6(1)           | 3(1)            | -15(1)          |
| C(31) | 20(1)           | 26(1)           | 49(1)           | 0(1)            | 3(1)            | 1(1)            |
| C(32) | 21(1)           | 15(1)           | 36(1)           | 1(1)            | 6(1)            | 1(1)            |

|       |       |       |        |        |        |       |
|-------|-------|-------|--------|--------|--------|-------|
| C(33) | 49(2) | 49(1) | 28(1)  | -4(1)  | 16(1)  | -5(1) |
| C(34) | 29(1) | 23(1) | 33(1)  | -7(1)  | 0(1)   | -4(1) |
| C(35) | 16(1) | 21(1) | 19(1)  | -4(1)  | 1(1)   | -1(1) |
| C(36) | 16(1) | 21(1) | 15(1)  | -4(1)  | 1(1)   | 0(1)  |
| C(37) | 22(1) | 27(1) | 20(1)  | -4(1)  | -2(1)  | 4(1)  |
| C(38) | 18(1) | 40(1) | 23(1)  | -13(1) | -3(1)  | 1(1)  |
| C(39) | 19(1) | 22(1) | 23(1)  | -7(1)  | 2(1)   | -3(1) |
| C(40) | 18(1) | 23(1) | 36(1)  | -6(1)  | 1(1)   | -6(1) |
| C(41) | 21(1) | 22(1) | 31(1)  | 1(1)   | 3(1)   | -5(1) |
| C(42) | 24(1) | 32(1) | 36(1)  | -1(1)  | 8(1)   | -5(1) |
| C(43) | 23(1) | 32(1) | 31(1)  | -4(1)  | 9(1)   | -1(1) |
| C(44) | 16(1) | 21(1) | 29(1)  | -2(1)  | 0(1)   | 1(1)  |
| C(45) | 17(1) | 26(1) | 30(1)  | 2(1)   | -4(1)  | 2(1)  |
| C(46) | 20(1) | 41(1) | 36(1)  | -3(1)  | -10(1) | 1(1)  |
| C(47) | 21(1) | 43(1) | 31(1)  | -8(1)  | -4(1)  | -5(1) |
| C(48) | 71(2) | 23(1) | 49(1)  | 1(1)   | -2(1)  | 16(1) |
| C(49) | 39(1) | 53(2) | 43(1)  | -16(1) | -23(1) | 13(1) |
| C(50) | 31(2) | 57(2) | 134(4) | -2(2)  | -18(2) | 12(1) |
| C(51) | 58(2) | 28(1) | 38(1)  | 4(1)   | -10(1) | 8(1)  |
| C(52) | 20(1) | 30(1) | 26(1)  | -13(1) | 1(1)   | -2(1) |
| Cl(1) | 19(1) | 19(1) | 24(1)  | 2(1)   | 0(1)   | 1(1)  |
| N(1)  | 15(1) | 22(1) | 16(1)  | 0(1)   | -3(1)  | -2(1) |
| O(1)  | 15(1) | 17(1) | 15(1)  | -1(1)  | -1(1)  | 0(1)  |
| O(2)  | 17(1) | 14(1) | 19(1)  | 0(1)   | 1(1)   | 1(1)  |
| O(3)  | 31(1) | 21(1) | 17(1)  | 1(1)   | -1(1)  | -1(1) |
| O(4)  | 38(1) | 16(1) | 19(1)  | 1(1)   | 4(1)   | -3(1) |
| P(1)  | 14(1) | 15(1) | 14(1)  | 0(1)   | -1(1)  | 0(1)  |
| Rh(1) | 13(1) | 18(1) | 19(1)  | 0(1)   | -1(1)  | -1(1) |

---

**Table 20.** Hydrogen coordinates ( $\times 10^4$ ) and isotropic displacement parameters ( $\text{\AA}^2 \times 10^3$ ) for **T9**.

|        | x     | y    | z    | U(eq) |
|--------|-------|------|------|-------|
| H(1A)  | 246   | 5704 | 2629 | 28    |
| H(1B)  | 727   | 6383 | 3057 | 28    |
| H(2A)  | -1218 | 5322 | 4121 | 25    |
| H(2B)  | -998  | 5042 | 3295 | 25    |
| H(3A)  | -2255 | 5806 | 3257 | 33    |
| H(3B)  | -1754 | 6487 | 3664 | 33    |
| H(5)   | 1061  | 4779 | 5732 | 22    |
| H(6)   | -566  | 4431 | 5079 | 22    |
| H(8)   | -849  | 3362 | 4308 | 26    |
| H(10)  | 988   | 4470 | 3126 | 25    |
| H(12)  | -905  | 3311 | 2064 | 30    |
| H(14)  | 688   | 2673 | 4516 | 33    |
| H(15)  | -1629 | 5494 | 5294 | 25    |
| H(17)  | -359  | 5649 | 7259 | 29    |
| H(19)  | -2981 | 5480 | 7225 | 34    |
| H(21A) | -1800 | 6748 | 2385 | 36    |
| H(21B) | -1372 | 5939 | 2200 | 36    |
| H(22A) | -514  | 7168 | 2951 | 35    |
| H(22B) | -274  | 6864 | 2138 | 35    |
| H(24)  | 2318  | 4456 | 4783 | 37    |
| H(26A) | -1370 | 4028 | 6331 | 52    |
| H(26B) | -1080 | 3741 | 7136 | 52    |
| H(26C) | -1326 | 3137 | 6507 | 52    |
| H(27)  | 3256  | 2315 | 4814 | 47    |
| H(29A) | -2214 | 2915 | 2851 | 57    |
| H(29B) | -2020 | 2715 | 3702 | 57    |
| H(29C) | -1595 | 2214 | 3055 | 57    |
| H(30A) | 486   | 3754 | 1406 | 59    |
| H(30B) | 1047  | 4393 | 1818 | 59    |
| H(30C) | 89    | 4585 | 1529 | 59    |
| H(31A) | -3582 | 5927 | 5809 | 48    |

|        |          |          |          |       |
|--------|----------|----------|----------|-------|
| H(31B) | -3641    | 5034     | 5971     | 48    |
| H(31C) | -3155    | 5334     | 5243     | 48    |
| H(33A) | -1384    | 6095     | 8365     | 63    |
| H(33B) | -1369    | 5186     | 8414     | 63    |
| H(33C) | -2277    | 5629     | 8390     | 63    |
| H(34A) | 308      | 8488     | 6476     | 42    |
| H(34B) | 694      | 8355     | 5662     | 42    |
| H(34C) | 1325     | 8597     | 6326     | 42    |
| H(35)  | 42       | 7047     | 5675     | 22    |
| H(37)  | 1336     | 5417     | 6810     | 28    |
| H(42A) | 3812     | 7174     | 3834     | 37    |
| H(42B) | 3393     | 7449     | 3066     | 37    |
| H(43A) | 2751     | 6328     | 2853     | 34    |
| H(43B) | 3605     | 6049     | 3277     | 34    |
| H(46A) | 3860     | 6428     | 4697     | 39    |
| H(46B) | 3543     | 6143     | 5495     | 39    |
| H(47A) | 2854     | 7240     | 5752     | 38    |
| H(47B) | 3658     | 7548     | 5277     | 38    |
| H(48A) | 2230     | 1279     | 4311     | 71    |
| H(48B) | 1213     | 1418     | 4436     | 71    |
| H(48C) | 1841     | 1302     | 5134     | 71    |
| H(49A) | 2935     | 6468     | 7542     | 68    |
| H(49B) | 2375     | 5722     | 7716     | 68    |
| H(49C) | 2174     | 6499     | 8146     | 68    |
| H(50A) | 4241     | 3322     | 5030     | 111   |
| H(50B) | 3837     | 4095     | 5347     | 111   |
| H(50C) | 4027     | 4010     | 4478     | 111   |
| H(51A) | 161      | 2503     | 6595     | 62    |
| H(51B) | 398      | 3074     | 7257     | 62    |
| H(51C) | 1013     | 3022     | 6542     | 62    |
| H(52)  | 1905     | 7636     | 7146     | 30    |
| H(40)  | 2103(17) | 8005(15) | 4886(14) | 31(7) |
| H(41)  | 2203(17) | 7873(15) | 3659(14) | 30(7) |
| H(44)  | 2204(18) | 5499(16) | 3700(15) | 36(7) |
| H(45)  | 2348(17) | 5594(15) | 4956(14) | 30(6) |

---

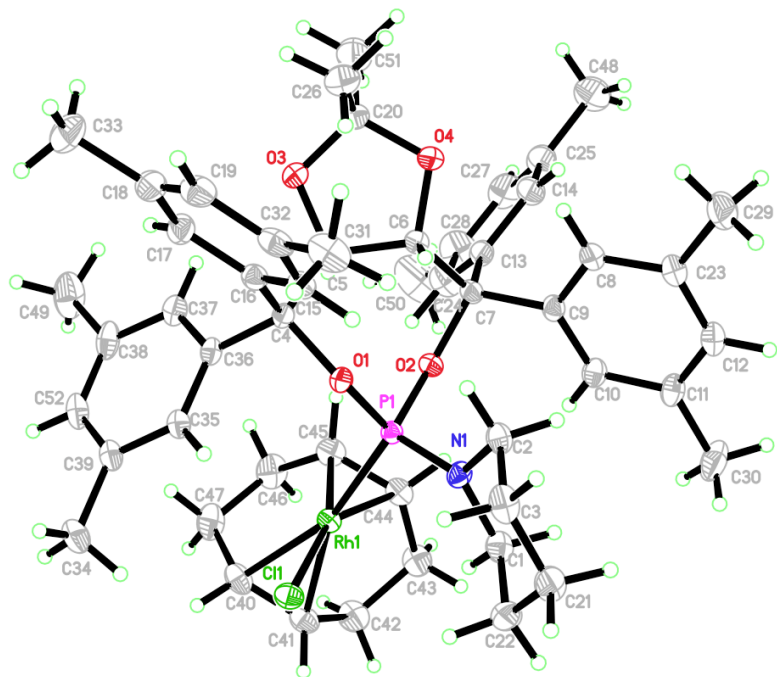

**Table 21.** Crystal data and structure refinement for **A1**.

|                                   |                                                          |                            |
|-----------------------------------|----------------------------------------------------------|----------------------------|
| Identification code               | rovis41_0m                                               |                            |
| Empirical formula                 | C <sub>34</sub> H <sub>50</sub> Cl N O <sub>2</sub> P Rh |                            |
| Formula weight                    | 674.08                                                   |                            |
| Temperature                       | 120 K                                                    |                            |
| Wavelength                        | 0.71073 Å                                                |                            |
| Crystal system                    | Triclinic                                                |                            |
| Space group                       | P-1                                                      |                            |
| Unit cell dimensions              | $a = 10.4105(5) \text{ \AA}$                             | $\alpha = 77.003(3)^\circ$ |
|                                   | $b = 10.8685(6) \text{ \AA}$                             | $\beta = 76.360(2)^\circ$  |
|                                   | $c = 16.5368(10) \text{ \AA}$                            | $\gamma = 64.354(2)^\circ$ |
| Volume                            | 1622.99(15) Å <sup>3</sup>                               |                            |
| Z                                 | 2                                                        |                            |
| Density (calculated)              | 1.379 Mg/m <sup>3</sup>                                  |                            |
| Absorption coefficient            | 0.688 mm <sup>-1</sup>                                   |                            |
| F(000)                            | 708                                                      |                            |
| Crystal size                      | 0.70 x 0.37 x 0.17 mm <sup>3</sup>                       |                            |
| Theta range for data collection   | 2.10 to 33.37°.                                          |                            |
| Index ranges                      | -16<=h<=13, -16<=k<=15, -25<=l<=25                       |                            |
| Reflections collected             | 19235                                                    |                            |
| Independent reflections           | 12140 [R(int) = 0.0176]                                  |                            |
| Completeness to theta = 33.37°    | 96.3 %                                                   |                            |
| Absorption correction             | Multi-scan                                               |                            |
| Max. and min. transmission        | 0.8890 and 0.6455                                        |                            |
| Refinement method                 | Full-matrix least-squares on F <sup>2</sup>              |                            |
| Data / restraints / parameters    | 12140 / 0 / 389                                          |                            |
| Goodness-of-fit on F <sup>2</sup> | 1.104                                                    |                            |
| Final R indices [I>2sigma(I)]     | R1 = 0.0336, wR2 = 0.0761                                |                            |
| R indices (all data)              | R1 = 0.0410, wR2 = 0.0792                                |                            |
| Largest diff. peak and hole       | 1.056 and -0.844 e.Å <sup>-3</sup>                       |                            |

**Table 22.** Atomic coordinates ( $\times 10^4$ ) and equivalent isotropic displacement parameters ( $\text{\AA}^2 \times 10^3$ ) for **A1**.  $U(\text{eq})$  is defined as one third of the trace of the orthogonalized  $U^{ij}$  tensor.

|       | x        | y       | z       | $U(\text{eq})$ |
|-------|----------|---------|---------|----------------|
| C(1)  | 2679(2)  | 6412(2) | 4177(1) | 18(1)          |
| C(2)  | 3711(2)  | 5600(2) | 3586(1) | 13(1)          |
| C(3)  | 3191(2)  | 4967(2) | 3167(1) | 12(1)          |
| C(4)  | 1725(2)  | 5267(2) | 3240(1) | 13(1)          |
| C(5)  | 1231(2)  | 6611(2) | 4340(1) | 19(1)          |
| C(6)  | 728(2)   | 6061(2) | 3855(1) | 16(1)          |
| C(7)  | 212(2)   | 7467(2) | 5014(1) | 29(1)          |
| C(8)  | -842(2)  | 6305(2) | 4004(1) | 22(1)          |
| C(9)  | 5251(2)  | 5552(2) | 3354(1) | 17(1)          |
| C(10) | 5482(2)  | 6415(2) | 3879(1) | 23(1)          |
| C(11) | 5462(2)  | 6175(2) | 2427(1) | 24(1)          |
| C(12) | 6416(2)  | 4076(2) | 3485(1) | 23(1)          |
| C(13) | 6577(2)  | 718(2)  | 3606(1) | 22(1)          |
| C(14) | 4216(2)  | 1871(2) | 4453(1) | 25(1)          |
| C(15) | 1241(2)  | 4796(2) | 2630(1) | 14(1)          |
| C(16) | 1684(2)  | 3384(2) | 2628(1) | 14(1)          |
| C(17) | 1071(2)  | 2863(2) | 2194(1) | 18(1)          |
| C(18) | 164(2)   | 3863(2) | 1646(1) | 22(1)          |
| C(19) | -161(2)  | 5260(2) | 1545(1) | 21(1)          |
| C(20) | 342(2)   | 5760(2) | 2065(1) | 17(1)          |
| C(21) | -45(2)   | 7279(2) | 1987(1) | 22(1)          |
| C(22) | -1070(2) | 6240(2) | 893(1)  | 28(1)          |
| C(23) | 1264(2)  | 1357(2) | 2277(1) | 22(1)          |
| C(24) | 1991(2)  | 396(2)  | 3020(1) | 27(1)          |
| C(25) | 2139(2)  | 773(2)  | 1460(2) | 33(1)          |
| C(26) | -240(2)  | 1330(2) | 2412(2) | 36(1)          |
| C(27) | 6145(2)  | 815(2)  | 289(1)  | 19(1)          |
| C(28) | 7404(2)  | 550(2)  | 552(1)  | 19(1)          |
| C(29) | 8267(2)  | 1418(2) | 274(1)  | 24(1)          |
| C(30) | 7346(2)  | 2971(2) | 255(1)  | 22(1)          |
| C(31) | 6010(2)  | 3301(2) | 932(1)  | 16(1)          |
| C(32) | 4641(2)  | 3464(2) | 823(1)  | 16(1)          |



|       |         |         |         |       |
|-------|---------|---------|---------|-------|
| C(33) | 4271(2) | 3234(2) | 57(1)   | 21(1) |
| C(34) | 5448(2) | 2006(2) | -359(1) | 23(1) |
| Cl(3) | 5896(1) | -687(1) | 2247(1) | 21(1) |
| N(1)  | 5070(2) | 1691(2) | 3620(1) | 16(1) |
| O(1)  | 2774(1) | 2508(1) | 3105(1) | 14(1) |
| O(2)  | 4135(1) | 4065(1) | 2599(1) | 12(1) |
| P(1)  | 4404(1) | 2437(1) | 2749(1) | 12(1) |
| Rh(1) | 5602(1) | 1536(1) | 1559(1) | 12(1) |

---

**Table 23.** Bond lengths [Å] and angles [°] for **A1**.

|             |            |                   |            |
|-------------|------------|-------------------|------------|
| C(1)-C(5)   | 1.394(2)   | C(29)-C(30)       | 1.536(3)   |
| C(1)-C(2)   | 1.400(2)   | C(30)-C(31)       | 1.526(2)   |
| C(2)-C(3)   | 1.399(2)   | C(31)-C(32)       | 1.409(2)   |
| C(2)-C(9)   | 1.538(2)   | C(31)-Rh(1)       | 2.1299(17) |
| C(3)-C(4)   | 1.397(2)   | C(32)-C(33)       | 1.508(2)   |
| C(3)-O(2)   | 1.3982(18) | C(32)-Rh(1)       | 2.1182(17) |
| C(4)-C(6)   | 1.407(2)   | C(33)-C(34)       | 1.534(3)   |
| C(4)-C(15)  | 1.492(2)   | Cl(3)-Rh(1)       | 2.3485(4)  |
| C(5)-C(6)   | 1.400(2)   | N(1)-P(1)         | 1.6337(15) |
| C(5)-C(7)   | 1.513(2)   | O(1)-P(1)         | 1.6333(12) |
| C(6)-C(8)   | 1.505(2)   | O(2)-P(1)         | 1.6359(12) |
| C(9)-C(10)  | 1.533(2)   | P(1)-Rh(1)        | 2.2451(4)  |
| C(9)-C(11)  | 1.536(3)   | C(5)-C(1)-C(2)    | 123.69(15) |
| C(9)-C(12)  | 1.540(3)   | C(3)-C(2)-C(1)    | 114.97(14) |
| C(13)-N(1)  | 1.462(2)   | C(3)-C(2)-C(9)    | 123.15(14) |
| C(14)-N(1)  | 1.457(2)   | C(1)-C(2)-C(9)    | 121.57(14) |
| C(15)-C(16) | 1.399(2)   | C(4)-C(3)-O(2)    | 116.60(13) |
| C(15)-C(20) | 1.403(2)   | C(4)-C(3)-C(2)    | 122.91(14) |
| C(16)-C(17) | 1.397(2)   | O(2)-C(3)-C(2)    | 120.33(13) |
| C(16)-O(1)  | 1.402(2)   | C(3)-C(4)-C(6)    | 119.67(14) |
| C(17)-C(18) | 1.403(3)   | C(3)-C(4)-C(15)   | 119.01(14) |
| C(17)-C(23) | 1.538(3)   | C(6)-C(4)-C(15)   | 121.25(14) |
| C(18)-C(19) | 1.383(3)   | C(1)-C(5)-C(6)    | 119.50(15) |
| C(19)-C(20) | 1.407(2)   | C(1)-C(5)-C(7)    | 119.57(16) |
| C(19)-C(22) | 1.512(3)   | C(6)-C(5)-C(7)    | 120.88(16) |
| C(20)-C(21) | 1.503(3)   | C(5)-C(6)-C(4)    | 118.45(15) |
| C(23)-C(24) | 1.534(3)   | C(5)-C(6)-C(8)    | 120.17(15) |
| C(23)-C(25) | 1.536(3)   | C(4)-C(6)-C(8)    | 121.37(15) |
| C(23)-C(26) | 1.541(3)   | C(10)-C(9)-C(11)  | 107.65(15) |
| C(27)-C(28) | 1.369(3)   | C(10)-C(9)-C(2)   | 111.50(14) |
| C(27)-C(34) | 1.510(3)   | C(11)-C(9)-C(2)   | 107.96(14) |
| C(27)-Rh(1) | 2.2678(17) | C(10)-C(9)-C(12)  | 107.42(15) |
| C(28)-C(29) | 1.501(3)   | C(11)-C(9)-C(12)  | 109.48(15) |
| C(28)-Rh(1) | 2.2432(17) | C(2)-C(9)-C(12)   | 112.70(14) |
|             |            | C(16)-C(15)-C(20) | 120.09(15) |

|                   |            |                   |            |
|-------------------|------------|-------------------|------------|
| C(16)-C(15)-C(4)  | 119.49(14) | C(31)-C(32)-Rh(1) | 71.09(10)  |
| C(20)-C(15)-C(4)  | 120.42(15) | C(33)-C(32)-Rh(1) | 109.09(11) |
| C(17)-C(16)-C(15) | 122.79(15) | C(32)-C(33)-C(34) | 113.89(15) |
| C(17)-C(16)-O(1)  | 121.46(15) | C(27)-C(34)-C(33) | 111.41(15) |
| C(15)-C(16)-O(1)  | 115.74(14) | C(14)-N(1)-C(13)  | 115.22(14) |
| C(16)-C(17)-C(18) | 114.22(16) | C(14)-N(1)-P(1)   | 123.53(12) |
| C(16)-C(17)-C(23) | 127.09(17) | C(13)-N(1)-P(1)   | 121.16(12) |
| C(18)-C(17)-C(23) | 118.68(16) | C(16)-O(1)-P(1)   | 117.76(10) |
| C(19)-C(18)-C(17) | 124.55(16) | C(3)-O(2)-P(1)    | 122.20(10) |
| C(18)-C(19)-C(20) | 119.32(16) | O(1)-P(1)-N(1)    | 97.23(7)   |
| C(18)-C(19)-C(22) | 120.29(17) | O(1)-P(1)-O(2)    | 101.98(6)  |
| C(20)-C(19)-C(22) | 120.39(18) | N(1)-P(1)-O(2)    | 109.12(7)  |
| C(15)-C(20)-C(19) | 117.89(16) | O(1)-P(1)-Rh(1)   | 119.26(5)  |
| C(15)-C(20)-C(21) | 121.95(16) | N(1)-P(1)-Rh(1)   | 118.68(5)  |
| C(19)-C(20)-C(21) | 120.13(16) | O(2)-P(1)-Rh(1)   | 108.89(4)  |
| C(24)-C(23)-C(25) | 108.90(17) | C(32)-Rh(1)-C(31) | 38.73(7)   |
| C(24)-C(23)-C(17) | 115.06(15) | C(32)-Rh(1)-C(28) | 96.83(7)   |
| C(25)-C(23)-C(17) | 109.30(17) | C(31)-Rh(1)-C(28) | 81.16(7)   |
| C(24)-C(23)-C(26) | 106.14(18) | C(32)-Rh(1)-P(1)  | 91.19(5)   |
| C(25)-C(23)-C(26) | 108.87(17) | C(31)-Rh(1)-P(1)  | 95.11(5)   |
| C(17)-C(23)-C(26) | 108.39(15) | C(28)-Rh(1)-P(1)  | 161.50(5)  |
| C(28)-C(27)-C(34) | 124.64(17) | C(32)-Rh(1)-C(27) | 80.89(7)   |
| C(28)-C(27)-Rh(1) | 71.35(10)  | C(31)-Rh(1)-C(27) | 88.00(7)   |
| C(34)-C(27)-Rh(1) | 110.21(11) | C(28)-Rh(1)-C(27) | 35.34(7)   |
| C(27)-C(28)-C(29) | 125.78(17) | P(1)-Rh(1)-C(27)  | 163.15(5)  |
| C(27)-C(28)-Rh(1) | 73.31(10)  | C(32)-Rh(1)-Cl(3) | 157.29(5)  |
| C(29)-C(28)-Rh(1) | 107.07(11) | C(31)-Rh(1)-Cl(3) | 162.92(5)  |
| C(28)-C(29)-C(30) | 113.71(15) | C(28)-Rh(1)-Cl(3) | 88.04(5)   |
| C(31)-C(30)-C(29) | 113.04(15) | P(1)-Rh(1)-Cl(3)  | 90.953(16) |
| C(32)-C(31)-C(30) | 124.82(16) | C(27)-Rh(1)-Cl(3) | 90.81(5)   |
| C(32)-C(31)-Rh(1) | 70.19(10)  |                   |            |
| C(30)-C(31)-Rh(1) | 113.59(11) |                   |            |
| C(31)-C(32)-C(33) | 126.44(15) |                   |            |

---

Symmetry transformations used to generate equivalent atoms:

**Table 24.** Anisotropic displacement parameters ( $\text{\AA}^2 \times 10^3$ ) for **A1**. The anisotropic displacement factor exponent takes the form:  $-2p^2 [ h^2 a^{*2} U^{11} + \dots + 2 h k a^* b^* U^{12} ]$

|       | $U^{11}$ | $U^{22}$ | $U^{33}$ | $U^{23}$ | $U^{13}$ | $U^{12}$ |
|-------|----------|----------|----------|----------|----------|----------|
| C(1)  | 19(1)    | 18(1)    | 17(1)    | -7(1)    | -3(1)    | -7(1)    |
| C(2)  | 14(1)    | 13(1)    | 14(1)    | -2(1)    | -3(1)    | -5(1)    |
| C(3)  | 12(1)    | 11(1)    | 11(1)    | -3(1)    | 0(1)     | -4(1)    |
| C(4)  | 12(1)    | 13(1)    | 14(1)    | -3(1)    | -2(1)    | -5(1)    |
| C(5)  | 17(1)    | 18(1)    | 18(1)    | -9(1)    | 2(1)     | -5(1)    |
| C(6)  | 12(1)    | 16(1)    | 18(1)    | -5(1)    | 0(1)     | -4(1)    |
| C(7)  | 23(1)    | 35(1)    | 30(1)    | -22(1)   | 5(1)     | -8(1)    |
| C(8)  | 12(1)    | 25(1)    | 27(1)    | -10(1)   | 2(1)     | -5(1)    |
| C(9)  | 14(1)    | 20(1)    | 18(1)    | -6(1)    | -1(1)    | -9(1)    |
| C(10) | 22(1)    | 31(1)    | 25(1)    | -10(1)   | -4(1)    | -14(1)   |
| C(11) | 30(1)    | 29(1)    | 20(1)    | -6(1)    | 2(1)     | -21(1)   |
| C(12) | 15(1)    | 22(1)    | 33(1)    | -7(1)    | -6(1)    | -5(1)    |
| C(13) | 16(1)    | 23(1)    | 21(1)    | 0(1)     | -4(1)    | -4(1)    |
| C(14) | 26(1)    | 28(1)    | 14(1)    | -2(1)    | -1(1)    | -6(1)    |
| C(15) | 11(1)    | 16(1)    | 14(1)    | -4(1)    | -1(1)    | -5(1)    |
| C(16) | 10(1)    | 17(1)    | 15(1)    | -5(1)    | 0(1)     | -5(1)    |
| C(17) | 14(1)    | 22(1)    | 20(1)    | -11(1)   | 2(1)     | -8(1)    |
| C(18) | 18(1)    | 31(1)    | 21(1)    | -12(1)   | -3(1)    | -10(1)   |
| C(19) | 13(1)    | 31(1)    | 17(1)    | -5(1)    | -3(1)    | -6(1)    |
| C(20) | 11(1)    | 20(1)    | 18(1)    | -3(1)    | -2(1)    | -4(1)    |
| C(21) | 19(1)    | 18(1)    | 25(1)    | 1(1)     | -7(1)    | -4(1)    |
| C(22) | 21(1)    | 40(1)    | 22(1)    | -4(1)    | -9(1)    | -8(1)    |
| C(23) | 16(1)    | 23(1)    | 33(1)    | -16(1)   | 4(1)     | -9(1)    |
| C(24) | 27(1)    | 20(1)    | 37(1)    | -8(1)    | 2(1)     | -13(1)   |
| C(25) | 29(1)    | 33(1)    | 37(1)    | -23(1)   | 5(1)     | -10(1)   |
| C(26) | 20(1)    | 31(1)    | 65(2)    | -22(1)   | 1(1)     | -14(1)   |
| C(27) | 27(1)    | 15(1)    | 15(1)    | -7(1)    | -1(1)    | -7(1)    |
| C(28) | 20(1)    | 14(1)    | 18(1)    | -5(1)    | 3(1)     | -3(1)    |
| C(29) | 18(1)    | 20(1)    | 26(1)    | -4(1)    | 6(1)     | -5(1)    |
| C(30) | 20(1)    | 20(1)    | 23(1)    | -4(1)    | 5(1)     | -9(1)    |
| C(31) | 19(1)    | 12(1)    | 16(1)    | -3(1)    | 1(1)     | -7(1)    |
| C(32) | 18(1)    | 13(1)    | 15(1)    | -2(1)    | -2(1)    | -3(1)    |

|       |       |       |       |       |       |       |
|-------|-------|-------|-------|-------|-------|-------|
| C(33) | 24(1) | 19(1) | 18(1) | -2(1) | -7(1) | -4(1) |
| C(34) | 32(1) | 20(1) | 17(1) | -5(1) | -5(1) | -8(1) |
| Cl(3) | 22(1) | 12(1) | 25(1) | -1(1) | 2(1)  | -6(1) |
| N(1)  | 14(1) | 16(1) | 13(1) | -1(1) | -2(1) | -4(1) |
| O(1)  | 11(1) | 14(1) | 16(1) | -2(1) | 0(1)  | -5(1) |
| O(2)  | 12(1) | 12(1) | 13(1) | -4(1) | 1(1)  | -4(1) |
| P(1)  | 11(1) | 11(1) | 12(1) | -3(1) | 0(1)  | -4(1) |
| Rh(1) | 12(1) | 10(1) | 13(1) | -3(1) | 0(1)  | -3(1) |

---

**Table 25.** Hydrogen coordinates ( $\times 10^4$ ) and isotropic displacement parameters ( $\text{\AA}^2 \times 10^3$ ) for **A1**.

|        | x     | y    | z    | U(eq) |
|--------|-------|------|------|-------|
| H(1)   | 2976  | 6842 | 4478 | 21    |
| H(7A)  | 739   | 7761 | 5279 | 44    |
| H(7B)  | -220  | 6923 | 5427 | 44    |
| H(7C)  | -528  | 8260 | 4765 | 44    |
| H(8A)  | -977  | 5748 | 3683 | 33    |
| H(8B)  | -1408 | 7260 | 3834 | 33    |
| H(8C)  | -1141 | 6061 | 4591 | 33    |
| H(10A) | 5377  | 6035 | 4462 | 35    |
| H(10B) | 4779  | 7347 | 3804 | 35    |
| H(10C) | 6433  | 6403 | 3700 | 35    |
| H(11A) | 6423  | 6144 | 2266 | 36    |
| H(11B) | 4777  | 7115 | 2353 | 36    |
| H(11C) | 5319  | 5656 | 2083 | 36    |
| H(12A) | 6231  | 3656 | 4051 | 35    |
| H(12B) | 7348  | 4109 | 3385 | 35    |
| H(12C) | 6396  | 3545 | 3099 | 35    |
| H(13A) | 7027  | 984  | 3940 | 33    |
| H(13B) | 7074  | 721  | 3038 | 33    |
| H(13C) | 6619  | -191 | 3831 | 33    |
| H(14A) | 3942  | 1106 | 4667 | 38    |
| H(14B) | 3365  | 2711 | 4419 | 38    |
| H(14C) | 4777  | 1913 | 4823 | 38    |
| H(18)  | -247  | 3567 | 1328 | 26    |
| H(21A) | 527   | 7429 | 2302 | 34    |
| H(21B) | -1049 | 7738 | 2203 | 34    |
| H(21C) | 140   | 7640 | 1406 | 34    |
| H(22A) | -1369 | 5738 | 620  | 43    |
| H(22B) | -513  | 6671 | 483  | 43    |
| H(22C) | -1905 | 6933 | 1161 | 43    |
| H(24A) | 1942  | -481 | 3073 | 41    |
| H(24B) | 1504  | 796  | 3527 | 41    |

|        |          |          |          |       |
|--------|----------|----------|----------|-------|
| H(24C) | 2983     | 272      | 2926     | 41    |
| H(25A) | 1661     | 1339     | 995      | 49    |
| H(25B) | 2216     | -150     | 1498     | 49    |
| H(25C) | 3086     | 765      | 1378     | 49    |
| H(26A) | -726     | 1885     | 1947     | 54    |
| H(26B) | -793     | 1690     | 2922     | 54    |
| H(26C) | -138     | 398      | 2450     | 54    |
| H(29A) | 8802     | 1246     | -283     | 28    |
| H(29B) | 8961     | 1138     | 652      | 28    |
| H(30A) | 7932     | 3417     | 329      | 26    |
| H(30B) | 7044     | 3349     | -292     | 26    |
| H(33A) | 4094     | 4061     | -352     | 26    |
| H(33B) | 3384     | 3087     | 216      | 26    |
| H(34A) | 5027     | 1709     | -702     | 28    |
| H(34B) | 6177     | 2291     | -724     | 28    |
| H(5)   | 3810(20) | 4010(20) | 1165(14) | 17(5) |
| H(3)   | 7840(20) | -300(20) | 836(13)  | 14(5) |
| H(2)   | 6040(20) | 3770(20) | 1363(14) | 19(5) |
| H(4)   | 5750(30) | 180(30)  | 435(16)  | 29(6) |

---

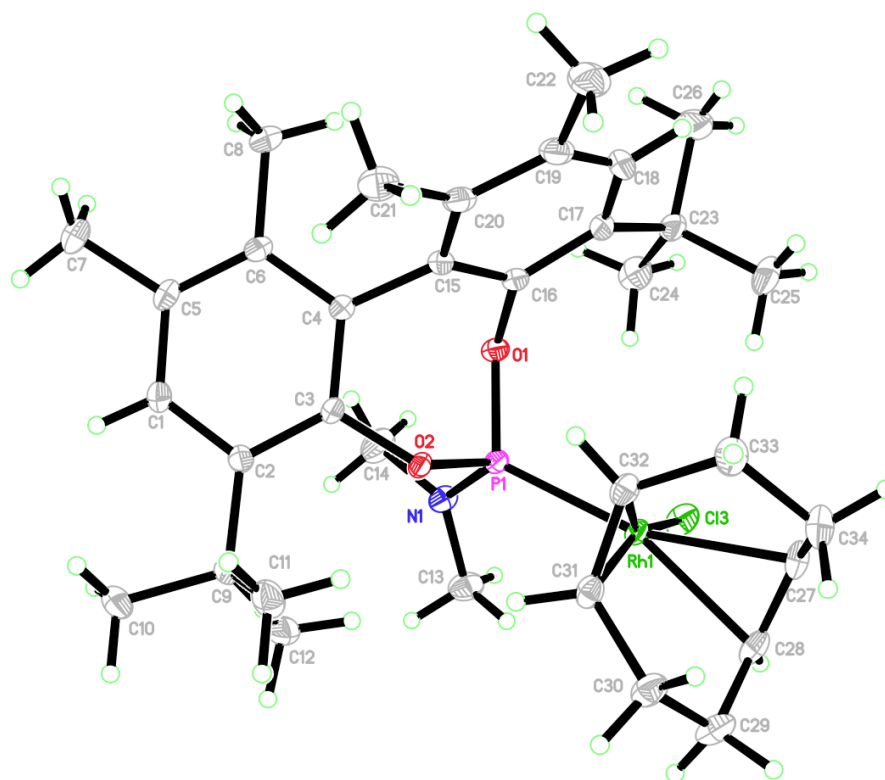



**Table 26.** Crystal data and structure refinement for **B4**.

|                                   |                                                                          |                     |
|-----------------------------------|--------------------------------------------------------------------------|---------------------|
| Identification code               | rovis45_0m                                                               |                     |
| Empirical formula                 | C <sub>36</sub> H <sub>46</sub> Cl N O <sub>2</sub> P Rh Si <sub>2</sub> |                     |
| Formula weight                    | 750.25                                                                   |                     |
| Temperature                       | 120 K                                                                    |                     |
| Wavelength                        | 0.71073 Å                                                                |                     |
| Crystal system                    | Orthorhombic                                                             |                     |
| Space group                       | P 2 <sub>1</sub> 2 <sub>1</sub> 2 <sub>1</sub>                           |                     |
| Unit cell dimensions              | $a = 11.2417(5)$ Å                                                       | $\alpha = 90^\circ$ |
|                                   | $b = 14.6792(6)$ Å                                                       | $\beta = 90^\circ$  |
|                                   | $c = 21.3614(9)$ Å                                                       | $\gamma = 90^\circ$ |
| Volume                            | 3525.0(3) Å <sup>3</sup>                                                 |                     |
| Z                                 | 4                                                                        |                     |
| Density (calculated)              | 1.414 Mg/m <sup>3</sup>                                                  |                     |
| Absorption coefficient            | 0.706 mm <sup>-1</sup>                                                   |                     |
| F(000)                            | 1560                                                                     |                     |
| Crystal size                      | 0.23 x 0.09 x 0.07 mm <sup>3</sup>                                       |                     |
| Theta range for data collection   | 1.68 to 33.27°.                                                          |                     |
| Index ranges                      | -17<=h<=9, -22<=k<=13, -32<=l<=32                                        |                     |
| Reflections collected             | 31400                                                                    |                     |
| Independent reflections           | 12869 [R(int) = 0.0581]                                                  |                     |
| Completeness to theta = 33.27°    | 99.8 %                                                                   |                     |
| Absorption correction             | Multi-scan                                                               |                     |
| Max. and min. transmission        | 0.9535 and 0.8516                                                        |                     |
| Refinement method                 | Full-matrix least-squares on F <sup>2</sup>                              |                     |
| Data / restraints / parameters    | 12869 / 0 / 422                                                          |                     |
| Goodness-of-fit on F <sup>2</sup> | 0.996                                                                    |                     |
| Final R indices [I>2sigma(I)]     | R1 = 0.0453, wR2 = 0.0863                                                |                     |
| R indices (all data)              | R1 = NaN, wR2 = 0.1035                                                   |                     |
| Absolute structure parameter      | -0.02(2)                                                                 |                     |
| Largest diff. peak and hole       | 0.606 and -0.511 e.Å <sup>-3</sup>                                       |                     |

**Table 27.** Atomic coordinates ( $\times 10^4$ ) and equivalent isotropic displacement parameters ( $\text{\AA}^2 \times 10^3$ ) for **B4**.  $U(\text{eq})$  is defined as one third of the trace of the orthogonalized  $U^{ij}$  tensor.

|       | x       | y        | z        | $U(\text{eq})$ |
|-------|---------|----------|----------|----------------|
| C(1)  | 2668(3) | 9520(2)  | 7963(1)  | 13(1)          |
| C(2)  | 2739(3) | 9780(2)  | 8586(1)  | 13(1)          |
| C(3)  | 3808(3) | 9550(2)  | 8970(1)  | 14(1)          |
| C(4)  | 4184(3) | 8655(2)  | 9024(1)  | 14(1)          |
| C(5)  | 4491(3) | 10242(2) | 9275(1)  | 16(1)          |
| C(6)  | 4291(3) | 11185(2) | 9180(1)  | 21(1)          |
| C(7)  | 5006(3) | 11826(2) | 9464(2)  | 25(1)          |
| C(8)  | 5938(4) | 11561(2) | 9862(2)  | 28(1)          |
| C(9)  | 6161(3) | 10659(2) | 9959(2)  | 25(1)          |
| C(10) | 5458(3) | 9979(2)  | 9667(1)  | 18(1)          |
| C(11) | 5676(3) | 9047(2)  | 9765(1)  | 20(1)          |
| C(12) | 1735(3) | 9766(2)  | 7554(1)  | 14(1)          |
| C(13) | 822(3)  | 10266(2) | 7815(1)  | 16(1)          |
| C(14) | 1739(3) | 10247(2) | 8852(1)  | 13(1)          |
| C(15) | 779(3)  | 10498(2) | 8459(1)  | 15(1)          |
| C(16) | 5064(3) | 8364(2)  | 9455(1)  | 18(1)          |
| C(17) | -202(3) | 10975(2) | 8712(2)  | 19(1)          |
| C(18) | -256(3) | 11172(2) | 9337(2)  | 25(1)          |
| C(19) | 660(3)  | 10898(2) | 9735(2)  | 22(1)          |
| C(20) | 1644(3) | 10454(2) | 9501(1)  | 18(1)          |
| C(21) | 6948(3) | 6855(3)  | 9421(2)  | 30(1)          |
| C(22) | 4290(3) | 6298(2)  | 9382(2)  | 29(1)          |
| C(23) | 5371(4) | 7106(3)  | 10556(2) | 35(1)          |
| C(24) | 719(3)  | 10386(2) | 6319(2)  | 29(1)          |
| C(25) | 3102(3) | 9395(3)  | 6291(2)  | 28(1)          |
| C(26) | 888(4)  | 8363(2)  | 6575(2)  | 31(1)          |
| C(27) | 3357(3) | 6739(2)  | 7088(2)  | 28(1)          |
| C(28) | 1950(3) | 7068(3)  | 7938(2)  | 31(1)          |
| C(29) | 7986(3) | 7731(2)  | 7648(2)  | 22(1)          |
| C(30) | 7579(3) | 7587(2)  | 7054(2)  | 22(1)          |
| C(31) | 8513(3) | 8598(3)  | 7896(2)  | 26(1)          |
| C(32) | 7583(3) | 9197(2)  | 8227(2)  | 27(1)          |

|       |         |         |         |       |
|-------|---------|---------|---------|-------|
| C(33) | 6394(3) | 9198(2) | 7905(2) | 22(1) |
| C(34) | 6176(3) | 9175(2) | 7261(2) | 23(1) |
| C(35) | 7115(3) | 9224(3) | 6747(2) | 28(1) |
| C(36) | 7507(3) | 8280(3) | 6531(2) | 30(1) |
| Cl(1) | 5810(1) | 6265(1) | 7811(1) | 27(1) |
| N(1)  | 3063(2) | 7296(2) | 7631(1) | 19(1) |
| O(1)  | 3630(2) | 9053(1) | 7708(1) | 15(1) |
| O(2)  | 3651(2) | 7999(1) | 8639(1) | 15(1) |
| P(2)  | 4043(1) | 8027(1) | 7902(1) | 14(1) |
| Rh(1) | 5961(1) | 7841(1) | 7651(1) | 15(1) |
| Si(1) | 1647(1) | 9484(1) | 6693(1) | 18(1) |
| Si(3) | 5400(1) | 7133(1) | 9681(1) | 20(1) |

---

—

**Table 28.** Bond lengths [Å] and angles [°] for **B4**.

|             |          |             |           |
|-------------|----------|-------------|-----------|
| C(1)-C(2)   | 1.387(4) | C(28)-N(1)  | 1.452(4)  |
| C(1)-O(1)   | 1.392(3) | C(29)-C(30) | 1.365(5)  |
| C(1)-C(12)  | 1.411(4) | C(29)-C(31) | 1.500(5)  |
| C(2)-C(14)  | 1.433(4) | C(29)-Rh(1) | 2.282(3)  |
| C(2)-C(3)   | 1.494(4) | C(30)-C(36) | 1.513(5)  |
| C(3)-C(4)   | 1.385(4) | C(30)-Rh(1) | 2.252(3)  |
| C(3)-C(5)   | 1.430(4) | C(31)-C(32) | 1.539(5)  |
| C(4)-O(2)   | 1.402(3) | C(32)-C(33) | 1.503(5)  |
| C(4)-C(16)  | 1.417(4) | C(33)-C(34) | 1.396(5)  |
| C(5)-C(6)   | 1.417(4) | C(33)-Rh(1) | 2.120(3)  |
| C(5)-C(10)  | 1.426(4) | C(34)-C(35) | 1.525(5)  |
| C(6)-C(7)   | 1.378(5) | C(34)-Rh(1) | 2.141(3)  |
| C(7)-C(8)   | 1.404(5) | C(35)-C(36) | 1.525(5)  |
| C(8)-C(9)   | 1.363(5) | Cl(1)-Rh(1) | 2.3455(8) |
| C(9)-C(10)  | 1.417(4) | N(1)-P(2)   | 1.643(3)  |
| C(10)-C(11) | 1.406(4) | O(1)-P(2)   | 1.630(2)  |
| C(11)-C(16) | 1.385(4) | O(2)-P(2)   | 1.634(2)  |
| C(12)-C(13) | 1.380(4) | P(2)-Rh(1)  | 2.2388(9) |
| C(12)-Si(1) | 1.888(3) |             |           |
| C(13)-C(15) | 1.418(4) |             |           |
| C(14)-C(15) | 1.415(4) |             |           |
| C(14)-C(20) | 1.424(4) |             |           |
| C(15)-C(17) | 1.414(4) |             |           |
| C(16)-Si(3) | 1.907(3) |             |           |
| C(17)-C(18) | 1.367(5) |             |           |
| C(18)-C(19) | 1.394(5) |             |           |
| C(19)-C(20) | 1.377(4) |             |           |
| C(21)-Si(3) | 1.872(4) |             |           |
| C(22)-Si(3) | 1.863(4) |             |           |
| C(23)-Si(3) | 1.870(3) |             |           |
| C(24)-Si(1) | 1.866(4) |             |           |
| C(25)-Si(1) | 1.852(4) |             |           |
| C(26)-Si(1) | 1.871(4) |             |           |
| C(27)-N(1)  | 1.457(4) |             |           |

|                   |          |                   |            |
|-------------------|----------|-------------------|------------|
|                   |          | C(18)-C(17)-C(15) | 120.8(3)   |
| C(2)-C(1)-O(1)    | 117.8(3) | C(17)-C(18)-C(19) | 120.1(3)   |
| C(2)-C(1)-C(12)   | 124.5(3) | C(20)-C(19)-C(18) | 120.6(3)   |
| O(1)-C(1)-C(12)   | 117.5(2) | C(19)-C(20)-C(14) | 120.9(3)   |
| C(1)-C(2)-C(14)   | 117.8(3) | C(30)-C(29)-C(31) | 126.2(3)   |
| C(1)-C(2)-C(3)    | 120.7(3) | C(30)-C(29)-Rh(1) | 71.30(19)  |
| C(14)-C(2)-C(3)   | 121.5(2) | C(31)-C(29)-Rh(1) | 109.4(2)   |
| C(4)-C(3)-C(5)    | 118.2(3) | C(29)-C(30)-C(36) | 126.9(3)   |
| C(4)-C(3)-C(2)    | 120.4(3) | C(29)-C(30)-Rh(1) | 73.67(19)  |
| C(5)-C(3)-C(2)    | 121.4(3) | C(36)-C(30)-Rh(1) | 105.3(2)   |
| C(3)-C(4)-O(2)    | 118.1(3) | C(29)-C(31)-C(32) | 112.3(3)   |
| C(3)-C(4)-C(16)   | 123.6(3) | C(33)-C(32)-C(31) | 113.2(3)   |
| O(2)-C(4)-C(16)   | 118.2(3) | C(34)-C(33)-C(32) | 127.3(3)   |
| C(6)-C(5)-C(10)   | 118.0(3) | C(34)-C(33)-Rh(1) | 71.7(2)    |
| C(6)-C(5)-C(3)    | 123.0(3) | C(32)-C(33)-Rh(1) | 108.7(2)   |
| C(10)-C(5)-C(3)   | 118.9(3) | C(33)-C(34)-C(35) | 125.9(3)   |
| C(7)-C(6)-C(5)    | 120.7(3) | C(33)-C(34)-Rh(1) | 70.0(2)    |
| C(6)-C(7)-C(8)    | 120.8(3) | C(35)-C(34)-Rh(1) | 113.6(2)   |
| C(9)-C(8)-C(7)    | 119.9(3) | C(36)-C(35)-C(34) | 112.0(3)   |
| C(8)-C(9)-C(10)   | 121.0(3) | C(30)-C(36)-C(35) | 113.7(3)   |
| C(11)-C(10)-C(9)  | 121.5(3) | C(28)-N(1)-C(27)  | 115.2(3)   |
| C(11)-C(10)-C(5)  | 119.0(3) | C(28)-N(1)-P(2)   | 124.7(2)   |
| C(9)-C(10)-C(5)   | 119.5(3) | C(27)-N(1)-P(2)   | 119.7(2)   |
| C(16)-C(11)-C(10) | 123.2(3) | C(1)-O(1)-P(2)    | 125.26(19) |
| C(13)-C(12)-C(1)  | 116.0(3) | C(4)-O(2)-P(2)    | 115.68(17) |
| C(13)-C(12)-Si(1) | 118.1(2) | O(1)-P(2)-O(2)    | 101.02(11) |
| C(1)-C(12)-Si(1)  | 125.8(2) | O(1)-P(2)-N(1)    | 108.82(13) |
| C(12)-C(13)-C(15) | 123.0(3) | O(2)-P(2)-N(1)    | 98.22(12)  |
| C(15)-C(14)-C(20) | 117.7(3) | O(1)-P(2)-Rh(1)   | 108.99(8)  |
| C(15)-C(14)-C(2)  | 119.2(2) | O(2)-P(2)-Rh(1)   | 119.14(8)  |
| C(20)-C(14)-C(2)  | 123.1(3) | N(1)-P(2)-Rh(1)   | 118.83(10) |
| C(17)-C(15)-C(14) | 119.8(3) | C(33)-Rh(1)-C(34) | 38.25(13)  |
| C(17)-C(15)-C(13) | 121.1(3) | C(33)-Rh(1)-P(2)  | 92.62(10)  |
| C(14)-C(15)-C(13) | 119.1(3) | C(34)-Rh(1)-P(2)  | 95.22(10)  |
| C(11)-C(16)-C(4)  | 116.0(3) | C(33)-Rh(1)-C(30) | 96.59(14)  |
| C(11)-C(16)-Si(3) | 117.8(2) | C(34)-Rh(1)-C(30) | 80.79(13)  |
| C(4)-C(16)-Si(3)  | 126.0(2) | P(2)-Rh(1)-C(30)  | 159.00(9)  |

|                   |            |
|-------------------|------------|
| C(33)-Rh(1)-C(29) | 80.71(13)  |
| C(34)-Rh(1)-C(29) | 87.19(13)  |
| P(2)-Rh(1)-C(29)  | 165.96(9)  |
| C(30)-Rh(1)-C(29) | 35.02(12)  |
| C(33)-Rh(1)-Cl(1) | 154.96(10) |
| C(34)-Rh(1)-Cl(1) | 165.24(10) |
| P(2)-Rh(1)-Cl(1)  | 90.89(3)   |
| C(30)-Rh(1)-Cl(1) | 88.71(9)   |
| C(29)-Rh(1)-Cl(1) | 90.14(9)   |
| C(25)-Si(1)-C(24) | 110.21(17) |
| C(25)-Si(1)-C(26) | 106.13(18) |
| C(24)-Si(1)-C(26) | 108.07(18) |
| C(25)-Si(1)-C(12) | 114.94(15) |
| C(24)-Si(1)-C(12) | 106.95(15) |
| C(26)-Si(1)-C(12) | 110.39(15) |
| C(22)-Si(3)-C(23) | 108.46(19) |
| C(22)-Si(3)-C(21) | 112.20(17) |
| C(23)-Si(3)-C(21) | 107.93(18) |
| C(22)-Si(3)-C(16) | 113.88(15) |
| C(23)-Si(3)-C(16) | 105.61(16) |
| C(21)-Si(3)-C(16) | 108.39(16) |

---

Symmetry transformations used to generate equivalent atoms:

**Table 29.** Anisotropic displacement parameters ( $\text{\AA}^2 \times 10^3$ ) for **B4**. The anisotropic displacement factor exponent takes the form:  $-2p^2 [ h^2 a^{*2} U^{11} + \dots + 2 h k a^* b^* U^{12} ]$

|       | U <sup>11</sup> | U <sup>22</sup> | U <sup>33</sup> | U <sup>23</sup> | U <sup>13</sup> | U <sup>12</sup> |
|-------|-----------------|-----------------|-----------------|-----------------|-----------------|-----------------|
| C(1)  | 14(1)           | 11(1)           | 14(1)           | -1(1)           | 3(1)            | 1(1)            |
| C(2)  | 14(1)           | 12(1)           | 14(1)           | 0(1)            | -1(1)           | -1(1)           |
| C(3)  | 14(2)           | 16(1)           | 12(1)           | 2(1)            | -1(1)           | 2(1)            |
| C(4)  | 15(2)           | 15(1)           | 12(1)           | -1(1)           | 2(1)            | 0(1)            |
| C(5)  | 18(2)           | 18(1)           | 13(1)           | -3(1)           | 0(1)            | 3(1)            |
| C(6)  | 26(2)           | 17(1)           | 20(1)           | -1(1)           | -2(1)           | 0(1)            |
| C(7)  | 31(2)           | 18(2)           | 27(2)           | -2(1)           | -6(1)           | -1(1)           |
| C(8)  | 32(2)           | 25(2)           | 26(2)           | -4(1)           | -10(2)          | -10(2)          |
| C(9)  | 25(2)           | 27(2)           | 22(1)           | -2(1)           | -8(1)           | -2(1)           |
| C(10) | 19(2)           | 20(2)           | 14(1)           | -2(1)           | -3(1)           | -1(1)           |
| C(11) | 20(2)           | 24(2)           | 18(1)           | -3(1)           | -5(1)           | 3(1)            |
| C(12) | 14(1)           | 14(1)           | 14(1)           | 1(1)            | -1(1)           | -2(1)           |
| C(13) | 15(2)           | 16(1)           | 17(1)           | -1(1)           | -4(1)           | -2(1)           |
| C(14) | 15(1)           | 11(1)           | 14(1)           | 1(1)            | 2(1)            | 1(1)            |
| C(15) | 14(2)           | 14(1)           | 17(1)           | 0(1)            | 0(1)            | 1(1)            |
| C(16) | 18(2)           | 23(2)           | 14(1)           | -2(1)           | -1(1)           | 5(1)            |
| C(17) | 18(2)           | 18(2)           | 21(1)           | -3(1)           | 0(1)            | 6(1)            |
| C(18) | 24(2)           | 25(2)           | 26(2)           | -4(1)           | 0(1)            | 11(2)           |
| C(19) | 24(2)           | 26(2)           | 17(1)           | -3(1)           | 3(1)            | 5(1)            |
| C(20) | 24(2)           | 15(1)           | 14(1)           | 0(1)            | -1(1)           | 2(1)            |
| C(21) | 24(2)           | 30(2)           | 35(2)           | -3(2)           | -4(2)           | 9(2)            |
| C(22) | 30(2)           | 22(2)           | 34(2)           | 6(2)            | -3(2)           | 2(2)            |
| C(23) | 54(2)           | 33(2)           | 19(1)           | 3(2)            | -5(2)           | 13(2)           |
| C(24) | 33(2)           | 34(2)           | 21(2)           | -1(1)           | -7(2)           | 5(2)            |
| C(25) | 24(2)           | 43(2)           | 18(1)           | 0(2)            | 0(1)            | 1(2)            |
| C(26) | 32(2)           | 29(2)           | 32(2)           | -8(2)           | -3(2)           | -3(2)           |
| C(27) | 28(2)           | 28(2)           | 29(2)           | -16(2)          | -5(2)           | 0(2)            |
| C(28) | 26(2)           | 41(2)           | 26(2)           | -4(2)           | 4(1)            | -16(2)          |
| C(29) | 19(1)           | 23(2)           | 25(1)           | 2(2)            | 0(1)            | 1(1)            |
| C(30) | 15(2)           | 25(2)           | 24(2)           | -6(1)           | 4(1)            | 3(1)            |
| C(31) | 19(2)           | 35(2)           | 24(2)           | -2(2)           | -2(1)           | -3(2)           |
| C(32) | 25(2)           | 28(2)           | 29(2)           | -6(2)           | 0(2)            | -6(2)           |

|       |       |       |       |       |       |       |
|-------|-------|-------|-------|-------|-------|-------|
| C(33) | 19(2) | 15(2) | 32(2) | -3(1) | 3(1)  | -4(1) |
| C(34) | 20(2) | 17(1) | 31(2) | 5(1)  | -2(1) | 2(1)  |
| C(35) | 22(2) | 35(2) | 29(2) | 10(2) | 3(2)  | 1(2)  |
| C(36) | 22(2) | 47(2) | 20(2) | 1(2)  | 4(1)  | -2(2) |
| Cl(1) | 26(1) | 15(1) | 38(1) | -2(1) | 2(1)  | 2(1)  |
| N(1)  | 17(1) | 21(1) | 20(1) | -7(1) | 3(1)  | -4(1) |
| O(1)  | 14(1) | 17(1) | 13(1) | 0(1)  | 2(1)  | 5(1)  |
| O(2)  | 18(1) | 15(1) | 13(1) | -2(1) | 0(1)  | 1(1)  |
| P(2)  | 14(1) | 15(1) | 14(1) | -2(1) | 1(1)  | 0(1)  |
| Rh(1) | 14(1) | 14(1) | 19(1) | -2(1) | 1(1)  | 1(1)  |
| Si(1) | 18(1) | 23(1) | 14(1) | -3(1) | -2(1) | 0(1)  |
| Si(3) | 23(1) | 19(1) | 18(1) | 1(1)  | -2(1) | 6(1)  |

---



**Table 30.** Hydrogen coordinates ( $\times 10^4$ ) and isotropic displacement parameters ( $\text{\AA}^2 \times 10^3$ ) for **B4**.

|        | x    | y     | z     | U(eq) |
|--------|------|-------|-------|-------|
| H(6)   | 3669 | 11374 | 8924  | 25    |
| H(7)   | 4870 | 12442 | 9391  | 30    |
| H(8)   | 6403 | 11999 | 10059 | 33    |
| H(9)   | 6783 | 10487 | 10220 | 30    |
| H(11)  | 6260 | 8881  | 10052 | 25    |
| H(13)  | 206  | 10460 | 7557  | 19    |
| H(17)  | -818 | 11158 | 8450  | 23    |
| H(18)  | -904 | 11489 | 9497  | 30    |
| H(19)  | 607  | 11016 | 10162 | 27    |
| H(20)  | 2254 | 10286 | 9771  | 21    |
| H(21A) | 6980 | 6848  | 8972  | 44    |
| H(21B) | 7171 | 6268  | 9579  | 44    |
| H(21C) | 7488 | 7308  | 9578  | 44    |
| H(22A) | 3502 | 6509  | 9476  | 43    |
| H(22B) | 4417 | 5718  | 9579  | 43    |
| H(22C) | 4377 | 6235  | 8937  | 43    |
| H(23A) | 5537 | 6499  | 10698 | 53    |
| H(23B) | 4600 | 7290  | 10701 | 53    |
| H(23C) | 5962 | 7516  | 10717 | 53    |
| H(24A) | 765  | 10328 | 5872  | 44    |
| H(24B) | 1006 | 10975 | 6442  | 44    |
| H(24C) | -93  | 10318 | 6450  | 44    |
| H(25A) | 3546 | 9946  | 6355  | 43    |
| H(25B) | 2976 | 9304  | 5851  | 43    |
| H(25C) | 3539 | 8888  | 6459  | 43    |
| H(26A) | 1386 | 7882  | 6730  | 46    |
| H(26B) | 742  | 8272  | 6136  | 46    |
| H(26C) | 146  | 8360  | 6797  | 46    |
| H(27A) | 2769 | 6827  | 6768  | 43    |
| H(27B) | 3374 | 6109  | 7208  | 43    |
| H(27C) | 4124 | 6913  | 6931  | 43    |

|        |          |          |          |        |
|--------|----------|----------|----------|--------|
| H(28A) | 2039     | 6504     | 8161     | 47     |
| H(28B) | 1334     | 7005     | 7630     | 47     |
| H(28C) | 1741     | 7542     | 8227     | 47     |
| H(31A) | 8860     | 8938     | 7552     | 32     |
| H(31B) | 9144     | 8452     | 8188     | 32     |
| H(32A) | 7481     | 8982     | 8653     | 33     |
| H(32B) | 7878     | 9818     | 8247     | 33     |
| H(35A) | 6795     | 9557     | 6393     | 34     |
| H(35B) | 7802     | 9555     | 6902     | 34     |
| H(36A) | 6951     | 8062     | 6218     | 36     |
| H(36B) | 8281     | 8329     | 6334     | 36     |
| H(29)  | 8080(30) | 7230(20) | 7882(15) | 16(8)  |
| H(30)  | 7440(30) | 7020(20) | 6941(14) | 8(8)   |
| H(33)  | 5790(40) | 9430(30) | 8163(18) | 31(11) |
| H(34)  | 5530(30) | 9340(30) | 7133(17) | 20(10) |

---

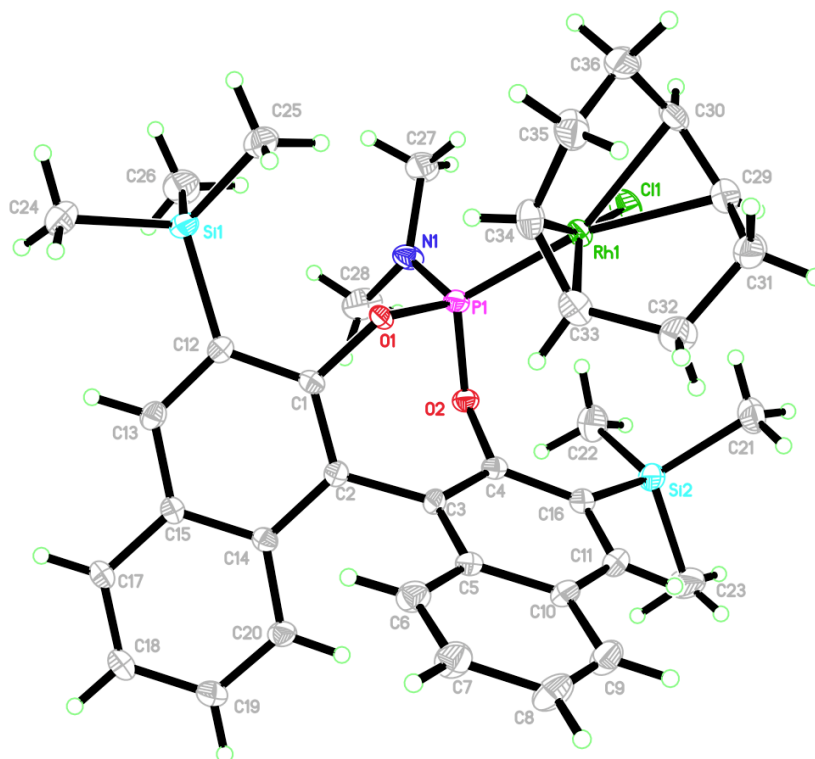

---

<sup>1</sup> Yu, R. T.; Rovis, T. *J. Am. Chem. Soc.* **2006**, *128*, 12370-12371.

<sup>2</sup> Lee, E. E.; Rovis, T. *Org. Lett.* **2008**, *10*, 1231-1234.

<sup>3</sup> Yu, R. T.; Lee, E. E.; Malik, G.; Rovis, T. *Angew. Chem. Int. Ed.* **2009**, *48*, 2379-2382.

<sup>4</sup> Giacomina, F.; Meetsma, A.; Panella, L.; Lefort, L.; de Vries, A. H. M.; de Vries, J.G. *Angew. Chem. Int. Ed.* **2007**, *46*, 1497-1500.

<sup>5</sup> Yu, R. T.; Rovis, T. *J. Am. Chem. Soc.* **2008**, *130*, 3262-3263.

<sup>6</sup> Bruker AXS Inc., 5465 East Cheryl Parkway, Madison, WI 53711-5373 USA

<sup>7</sup> Sheldrick, G. (1997) *SHELXL-97 Program for Crystal Structure Refinement*, Institut für Anorganische Chemie der Universität, Göttingen, Germany.
